# Supplementary material
Source: MDPI journal article supplement (https://www.mdpi.com/2071-1050/10/11/4121)
Supplement: s1 [file s1]

# CSA tool for Company A

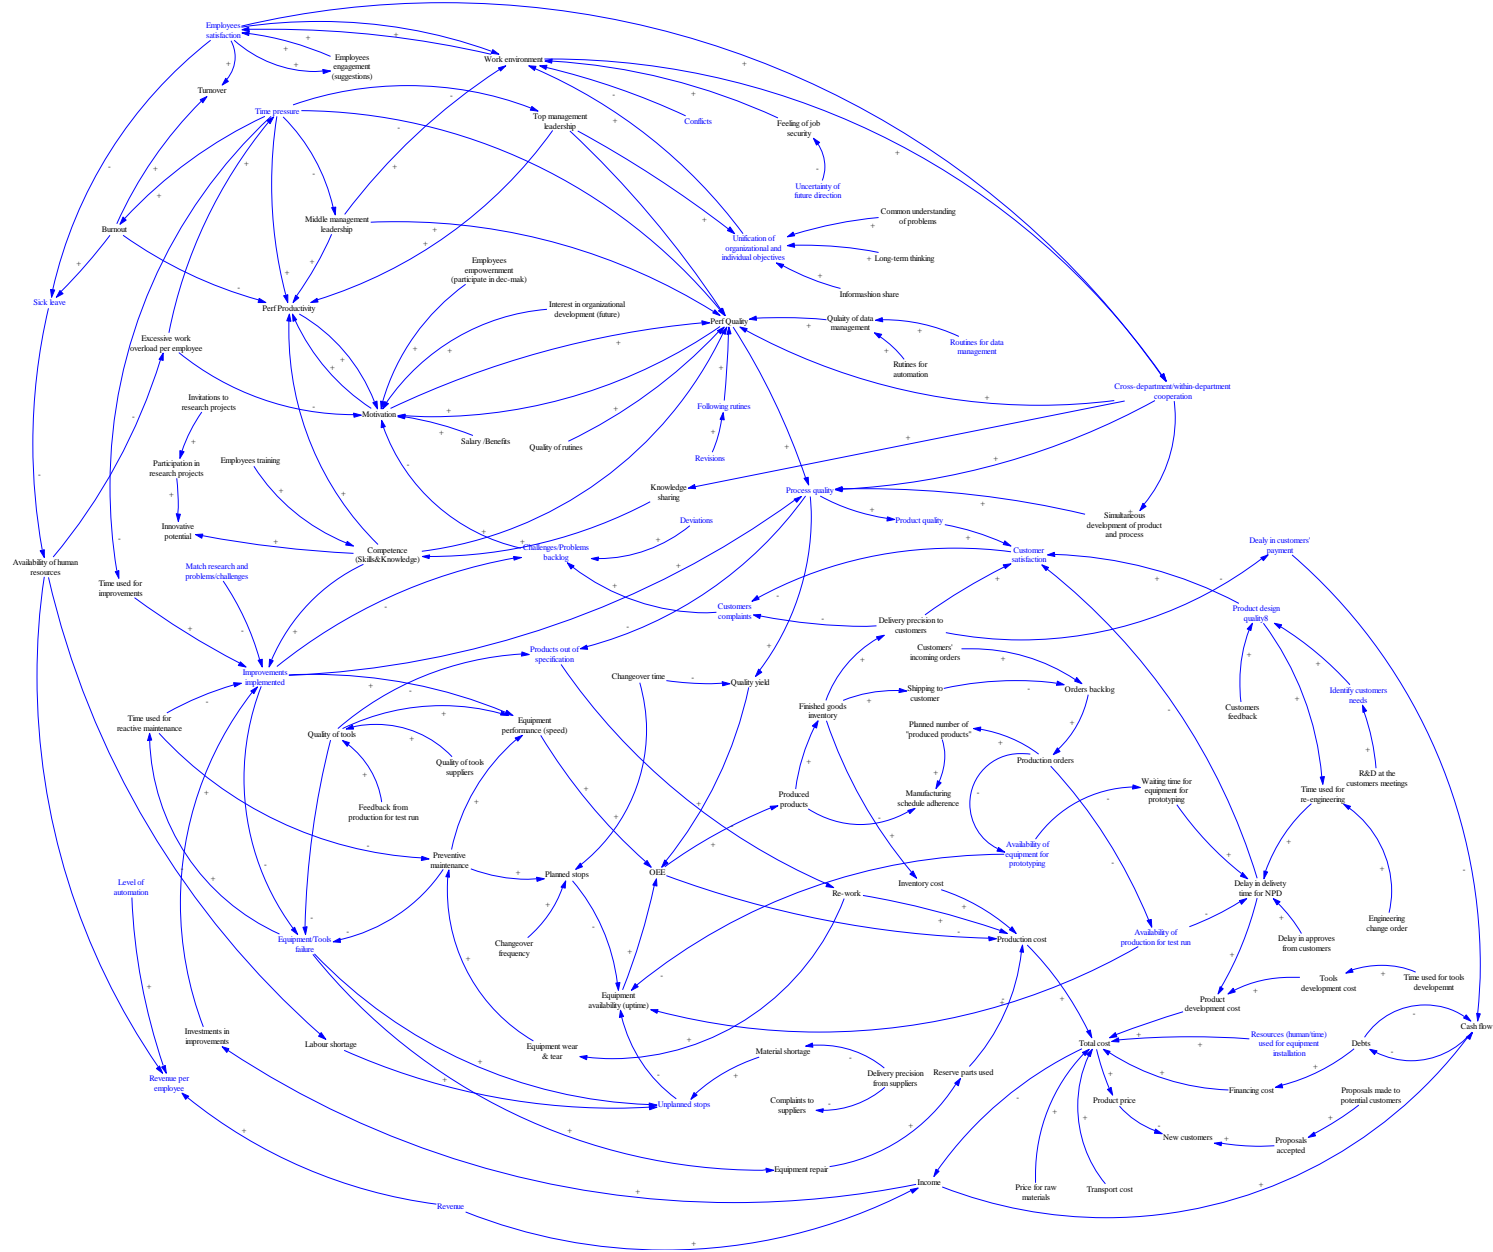

| Sustainability criteria for world                                                                             | Indicators                                                                                                                                                   | Desired direction | Element of organizational model       |
|---------------------------------------------------------------------------------------------------------------|--------------------------------------------------------------------------------------------------------------------------------------------------------------|-------------------|---------------------------------------|
| 2.1. Reduce extreme poverty (Target 1.1, 1.2)                                                                 | Minimal wage for workers per year.                                                                                                                           | ↑                 | Salary/Benefits.                      |
|                                                                                                               | Total tax payed per year.                                                                                                                                    | ↑                 | Revenue.                              |
|                                                                                                               | Range of benefits for workers.                                                                                                                               | ↑                 | Salary/Benefits.                      |
|                                                                                                               | Ration of supplier price to market price.                                                                                                                    | ↑                 | Price for raw materials.              |
| 2.2. Improve nationally social protection systems and measures (Target 1.3)                                   | Social security benefits for workers.                                                                                                                        | ↑                 | Salary/Benefits.                      |
|                                                                                                               | Number of employees with insurance, per type of insurance.                                                                                                   | ↑                 |                                       |
| 2.3. Ensure equal rights to basic services (e.g., new technology) (Target 1.4)                                | Number of new solutions/techniques/technologies implemented.                                                                                                 | ↑                 |                                       |
| 2.4. Reduce exposure and vulnerability to climate-related extreme events. (Target 1.5)                        | Risk management related to climate-related events.                                                                                                           | Y/N               |                                       |
|                                                                                                               | Investments in resilience to environmental hazards and resource scarcity, NOK & % of all investments.                                                        | ↑                 | Investments in improvements.          |
| 2.19. Reduce maternal mortality (Target 3.1)                                                                  | Maternity/paternity leave.                                                                                                                                   | ↑                 |                                       |
|                                                                                                               | Total number of incidents of discrimination against pregnancy.                                                                                               | ↓                 |                                       |
|                                                                                                               | Decent working conditions for female employees.                                                                                                              | ↑                 | Work environment.                     |
| 2.22. Reduce mortality from non-communicable diseases (Target 3.4)                                            | Type of injury and rates of injury, occupational diseases, lost days, and absenteeism, and total number of work related fatalities, by region and by gender. | ↓                 | Sick leave.                           |
|                                                                                                               | Total hours of overwork.                                                                                                                                     | ↓                 |                                       |
|                                                                                                               | Hours of overwork per employee.                                                                                                                              | ↓                 | Excessive work overload per employee. |
|                                                                                                               | Type of support for parents.                                                                                                                                 | -                 | Salary/Benefits.                      |
|                                                                                                               | Total air emission (GHGs, ODS, NOx, SOx, POP, VOC, HAP, PM).                                                                                                 | ↓                 | Produced products. Re-work.           |
|                                                                                                               | Total number and volume of significant spills.                                                                                                               | ↓                 |                                       |
|                                                                                                               | Total water discharge by quality and destination.                                                                                                            | ↓                 |                                       |
|                                                                                                               | Human health impact (e.g., ionizing radiation, human toxicity, respiratory inorganics).                                                                      | ↓                 |                                       |
|                                                                                                               |                                                                                                                                                              |                   |                                       |
| 2.24. Reduce number of deaths and injuries from road traffic accidents (Target 3.6)                           | Legal complaints against vehicles owned by company.                                                                                                          | ↓                 |                                       |
| 2.26. Increase health coverage (Target 3.8)                                                                   | Percentage of employees with life insurance, disability, and invalidity coverage.                                                                            | ↑                 |                                       |
| 2.27. Reduce deaths and illness from hazardous chemicals (Target 3.9)                                         | Total amount of hazardous chemicals used in production.                                                                                                      | ↓                 |                                       |
|                                                                                                               | Total amount of hazardous chemicals in a product.                                                                                                            | ↓                 |                                       |
| 2.28. Reduce deaths and illness from air, water, and soil pollution and contamination (Target 3.9)            | Total air emission (GHGs, ODS, NOx, SOx, POP, VOC, HAP, PM).                                                                                                 | ↑                 | Produced products. Re-work.           |
|                                                                                                               | Water quality within the company.                                                                                                                            | ↑                 |                                       |
|                                                                                                               | Total water discharge by quality and destination.                                                                                                            | ↓                 |                                       |
|                                                                                                               | Total weight of waste by type and disposal method.                                                                                                           | ↓                 | Improvements implemented.             |
| 2.33. Ensure free, equitable and quality primary and secondary education for all girls and boys (Target 4.1)  | Operations and suppliers identified as having significant risk for incidents of child labor.                                                                 | 0                 |                                       |
| 2.34. Ensure access to quality early childhood development, care and pre-primary education (Target 4.2)       | Type of support for parents.                                                                                                                                 | -                 |                                       |
| 2.35. Ensure equal access to affordable and quality technical, vocational and tertiary education (Target 4.3) | Average hours of training per year per employee by gender, and by employee category.                                                                         | ↑                 | Employees training.                   |
|                                                                                                               | Programs for skills management and lifelong learning that support the continued employability of employees.                                                  | ↑                 | Competence.                           |

|                                                                                                                              |                                                                                                                                                         |     |                                            |
|------------------------------------------------------------------------------------------------------------------------------|---------------------------------------------------------------------------------------------------------------------------------------------------------|-----|--------------------------------------------|
| 2.36. Increase the number of youth and adults with relevant skills for development/decent jobs/entrepreneurship (Target 4.4) | Percentage of employees receiving regular performance and career development reviews, by gender and age.                                                | ↑   |                                            |
|                                                                                                                              | Programs for skills management and lifelong learning that support the continued employability of employees.                                             | ↑   | Competence.                                |
| 2.37. Eliminate genders disparities in education (Target 4.5)                                                                | Training, internship programs, and further education without discrimination.                                                                            | ↑   | Employees training.                        |
| 2.38. Ensure access to education/training for vulnerable (Target 4.5)                                                        | Percentage of employees receiving regular performance and career development reviews, by gender and by employee category.                               | ↑   |                                            |
| 2.40. Improve knowledge and skills to promote SD (Target 4.7)                                                                | Percentage of employees trained in sustainability initiatives and sustainable development, including specific topics on women's rights, water use, etc. | ↑   | Employees training.                        |
| 2.44. Reduce discrimination against all women/girls (Target 5.1)                                                             | Percentage of employees in the company by gender.                                                                                                       | -   |                                            |
|                                                                                                                              | Percentage of women in senior executive and senior and middle management ranks.                                                                         | ↑   |                                            |
|                                                                                                                              | Total number of incidents of discrimination and harassment.                                                                                             | 0   |                                            |
|                                                                                                                              | Total number of employees that took parental leave, by gender.                                                                                          | -   |                                            |
| 2.45. Eliminate violence against women (Target 5.2)                                                                          | Registered cases of workplace violence and harassment against women.                                                                                    | 0   | Employees' satisfaction. Work environment. |
| 2.47. Recognize unpaid domestic work and care (Target 5.4.)                                                                  | Benefits provided to full-time employees compared to temporary/part-time employees.                                                                     | ↓   | Salary/Benefits.                           |
|                                                                                                                              | Flexible work option.                                                                                                                                   | ↑   | Salary/Benefits.                           |
|                                                                                                                              | Total number of employees that took parental leave, by gender.                                                                                          | -   |                                            |
| 2.48. Ensure equal opportunities for women for leadership (Target 5.5)                                                       | Percentage of women in senior executive and senior and middle management ranks.                                                                         | ↑   |                                            |
| 2.53. Promote gender equality (Target 5.c)                                                                                   | Percentage of employees in the company by gender.                                                                                                       | -   |                                            |
|                                                                                                                              | Percentage of women in senior executive and senior and middle management ranks.                                                                         | ↑   |                                            |
|                                                                                                                              | Ratio of basic salary and remuneration of women to men by employee category.                                                                            | -   | Salary/Benefits.                           |
| 2.54. Increase access to safe and affordable drinking water (Target 6.1)                                                     | Total water withdrawal.                                                                                                                                 | ↓   |                                            |
|                                                                                                                              | Total volume of water recycled and reused by the company.                                                                                               | ↑   |                                            |
|                                                                                                                              | Total water discharge by quality and destination.                                                                                                       | ↓   |                                            |
| 2.55. Increase sanitation and hygiene (Target 6.2)                                                                           | Waste management.                                                                                                                                       | ↑   |                                            |
|                                                                                                                              | Access to sanitation facility (% of employees with access to a sanitation facility).                                                                    | ↑   |                                            |
|                                                                                                                              | Sanitation and hygiene management.                                                                                                                      | Y/N |                                            |
| 2.56. Improve water quality (Target 6.3)                                                                                     | Total water discharge by quality and destination.                                                                                                       | ↓   |                                            |
| 2.57. Increase water-use efficiency (Target 6.4)                                                                             | Water efficiency (consumption per unit produced) within the company.                                                                                    | ↑   |                                            |
|                                                                                                                              | Water efficiency (consumption per unit produced) at the suppliers' sites.                                                                               | ↑   |                                            |
|                                                                                                                              | Total water discharge by quality and destination                                                                                                        | ↓   |                                            |
| 2.58. Reduce water scarcity (Target 6.4)                                                                                     | Total water withdrawal.                                                                                                                                 | ↓   |                                            |
|                                                                                                                              | Total volume of water recycled and reused by the company.                                                                                               | ↑   |                                            |
| 2.60. Protect and restore water-related ecosystems (Target 6.6)                                                              | Total water discharge by quality and destination.                                                                                                       | ↓   |                                            |
|                                                                                                                              | Investments in environmental protection.                                                                                                                | ↑   | Investments in improvements.               |
| 2.64. Increase the use of renewable energy (Target 7.2)                                                                      | Proportion of renewable energy used in the company.                                                                                                     | ↑   |                                            |
| 2.65. Improve energy efficiency (Target 7.3)                                                                                 | Energy efficiency (consumption per unit produced).                                                                                                      | ↑   | Produced products. Production cost.        |
|                                                                                                                              | Energy intensity (consumption per monetary unit of sales).                                                                                              | ↓   | Produced products.                         |
| 2.69. Sustain economic growth (Target 8.1)                                                                                   | Revenues.                                                                                                                                               | ↑   | Revenue.                                   |
|                                                                                                                              | Total tax paid per year.                                                                                                                                | ↑   | Revenue.                                   |

|                                                                                          |                                                                                                                                                |   |                                                    |
|------------------------------------------------------------------------------------------|------------------------------------------------------------------------------------------------------------------------------------------------|---|----------------------------------------------------|
|                                                                                          | Operating cost.                                                                                                                                | ↓ | Production cost. Total cost.                       |
|                                                                                          | Employee wages and benefits.                                                                                                                   | ↑ | Salary/Benefits.                                   |
|                                                                                          | Payments to providers of capital.                                                                                                              | ↑ |                                                    |
|                                                                                          | Payments to government.                                                                                                                        | ↑ |                                                    |
|                                                                                          | Community investments.                                                                                                                         | ↑ |                                                    |
| 2.70. Increase economic productivity (Target 8.2)                                        | Proportion of employees agreed that their productivity has increased.                                                                          | ↑ | Perf_Productivity.                                 |
|                                                                                          | Ratio of monthly product value shipped to monthly labor expenditures.                                                                          | ↑ |                                                    |
|                                                                                          | Adoption of information technology.                                                                                                            | ↑ |                                                    |
|                                                                                          | Technological productivity.                                                                                                                    | ↑ |                                                    |
| 2.71. Ensure technological upgrading and innovation (Target 8.2)                         | Total number of implemented technological upgrades and innovative practices.                                                                   | ↑ | Improvements implemented.<br>Innovation potential. |
| 2.72. Increase decent job creation (Target 8.3)                                          | Work conditions.                                                                                                                               | ↑ | Work environment.                                  |
|                                                                                          | Proportion of orders (in NOK) from local suppliers.                                                                                            | ↑ |                                                    |
|                                                                                          | Total number and rates of new employee hires.                                                                                                  | ↑ |                                                    |
| 2.73. Ensure creativity and innovation (Target 8.3)                                      | Total number of implemented innovative practices.                                                                                              | ↑ | Improvements implemented.<br>Innovation potential. |
|                                                                                          | Return on implementation of innovative practice.                                                                                               | ↑ |                                                    |
|                                                                                          | Proportion of employees by level of education.                                                                                                 | - |                                                    |
|                                                                                          | Employees' perception of creativity of the company.                                                                                            | ↑ |                                                    |
| 2.74. Improve resource efficiency in consumption and production (Target 8.4)             | Energy efficiency (consumption per unit produced).                                                                                             | ↑ | Produced products.                                 |
|                                                                                          | Water efficiency (consumption per unit produced).                                                                                              | ↑ | Produced products.                                 |
|                                                                                          | Material efficiency (consumption per unit produced).                                                                                           | ↑ | Produced products.                                 |
|                                                                                          | Percentage of recycled input materials.                                                                                                        | ↑ |                                                    |
|                                                                                          | Percentage of reclaimed products and their packaging materials for each product category.                                                      | ↑ |                                                    |
|                                                                                          | Duration of product life.                                                                                                                      | ↑ |                                                    |
| 2.75. Provide decent work for people, including for those with disabilities (Target 8.5) | Total number of employees with disabilities.                                                                                                   | - |                                                    |
|                                                                                          | Total number and rates of new employee hires.                                                                                                  | ↑ |                                                    |
|                                                                                          | Employee turnover by age group and gender.                                                                                                     | ↓ |                                                    |
|                                                                                          | Benefits and social protection.                                                                                                                | ↑ | Salary/Benefits                                    |
|                                                                                          | Total number of employees that were entitled to parental leave, by gender.                                                                     | - |                                                    |
|                                                                                          | Total number of employees that took parental leave, by gender.                                                                                 | - |                                                    |
|                                                                                          | Return to work and retention rates after parental leave, by gender.                                                                            | ↑ |                                                    |
|                                                                                          | Training and education.                                                                                                                        | ↑ | Employees training                                 |
|                                                                                          | Total number of incidents of discrimination and harassment.                                                                                    | 0 |                                                    |
| 2.76. Provide employment to young people (Target 8.5)                                    | Ration of employees with flexible working hours to fixed hours.                                                                                | ↑ |                                                    |
|                                                                                          | Total number of employees in category under 30 years old.                                                                                      | ↑ |                                                    |
| 2.77. Minimize forced labor (Target 8.7)                                                 | Perception of company's performance on human rights by its employees.                                                                          | ↑ |                                                    |
|                                                                                          | Percentage of new suppliers that were screened using human rights criteria.                                                                    | ↑ |                                                    |
| 2.78. Minimize child labor (Target 8.7)                                                  | Operations and suppliers identified as having significant risk for incidents of child labor.                                                   | 0 |                                                    |
| 2.79. Improve safe and secure working environment (Target 8.8)                           | Incidents related to occupational health and safety.                                                                                           | 0 | Sick leave                                         |
|                                                                                          | Type of injury and rates of injury, occupational diseases, lost days, and absenteeism, and total number of work-related fatalities, by gender. | ↓ | Sick leave.                                        |

|                                                                                         |                                                                                                                                                                                    |     |                                                    |
|-----------------------------------------------------------------------------------------|------------------------------------------------------------------------------------------------------------------------------------------------------------------------------------|-----|----------------------------------------------------|
|                                                                                         | Workers with high incidence or high risk of diseases related to their occupation.                                                                                                  | ↓   |                                                    |
|                                                                                         | Total operations and suppliers in which employee rights to exercise freedom of association or collective bargaining may be violated or at significant risk.                        | ↓   |                                                    |
|                                                                                         | Total number of incidents of discrimination and harassment.                                                                                                                        | 0   |                                                    |
| 2.84. Improve infrastructure (Target 9.1)                                               | Infrastructure investments.                                                                                                                                                        | ↑   | Investments in improvements.                       |
| 2.85. Increase industry's share of employment and gross domestic product (Target 9.2)   | Total tax paid per year.                                                                                                                                                           | ↑   | Revenue.                                           |
|                                                                                         | Total number and rates of new employee hires.                                                                                                                                      | ↑   |                                                    |
|                                                                                         | Net employment creation expressed as percentage contribution to employment in a region.                                                                                            | ↑   |                                                    |
| 2.86. Increase the access of small-scale enterprises to financial services (Target 9.3) | Percentage of orders (and invoices) from local SMEs suppliers compared to total orders.                                                                                            | ↑   |                                                    |
| 2.87. Upgrade infrastructure and retrofit industries (Target 9.4)                       | Total number of implemented technological upgrading projects.                                                                                                                      | ↑   | Investments in improvements. Innovation potential. |
| 2.88. Increase scientific research (Target 9.5)                                         | Time used for R&D activities as a percentage of total worktime.                                                                                                                    | ↑   | Product quality. Process quality.                  |
|                                                                                         | ROI in R&D activities.                                                                                                                                                             | ↑   |                                                    |
|                                                                                         | Total number of cooperation projects with research institutions.                                                                                                                   | ↑   | Participation in research projects.                |
| 2.93. Increase income of the bottom 40% of population (Target 10.1)                     | Minimal wage for workers per year.                                                                                                                                                 | ↑   | Salary/Benefits.                                   |
| 2.94. Reduce proportion of people below 50% of median income (Target 10.2)              | Minimal wage for workers per year.                                                                                                                                                 | ↑   | Salary/Benefits.                                   |
| 2.95. Reduce inequalities and discrimination (Target 10.3)                              | Total number of incidents of discrimination and harassment.                                                                                                                        | 0   |                                                    |
|                                                                                         | Training and education.                                                                                                                                                            | ↑   | Employees training                                 |
|                                                                                         | Benefits provided to full-time employees compared to temporary/part-time employees.                                                                                                | ↓   | Salary/Benefits                                    |
| 2.96. Adopt policies to decrease inequality (Target 10.4)                               | Total tax paid per year.                                                                                                                                                           | ↑   | Revenue                                            |
|                                                                                         | Percentage of employees in the company in each category, gender, age (under 30 years old, 30-50 years old, over 50 years old), minority groups.                                    | -   |                                                    |
|                                                                                         | Average wage for employees in the company in each category, gender, age (under 30 years old, 30-50 years old, over 50 years old), minority groups.                                 | -   |                                                    |
| 2.105. Increase access to safe, adequate and affordable housing (Target 11.1)           | Total investments in infrastructure.                                                                                                                                               | ↑   |                                                    |
| 2.106. Increase access to safe, adequate and affordable transport (Target 11.2)         | Total investments in infrastructure.                                                                                                                                               | ↑   |                                                    |
| 2.111. Reduce number of deaths and affected by disasters (Target 11.5)                  | Disaster risk management.                                                                                                                                                          | Y/N |                                                    |
| 2.120. Reduce the use of natural resources (Target 12.2)                                | Total weight/volume of renewable materials used in production per type of material (raw materials, associated process materials, semi-manufacture parts, packaging materials).     | ↑   |                                                    |
|                                                                                         | Total weight/volume of non-renewable materials used in production per type of material (raw materials, associated process materials, semi-manufacture parts, packaging materials). | ↓   |                                                    |
|                                                                                         | Energy efficiency (consumption per unit produced).                                                                                                                                 | ↑   | Produced products                                  |
|                                                                                         | Water efficiency (consumption per unit produced).                                                                                                                                  | ↑   | Produced products                                  |
|                                                                                         | Percentage of reclaimed products and their packaging materials for each product category.                                                                                          | ↑   |                                                    |

|                                                                                                                |                                                                                                                                                                       |     |                                           |
|----------------------------------------------------------------------------------------------------------------|-----------------------------------------------------------------------------------------------------------------------------------------------------------------------|-----|-------------------------------------------|
| 2.122. Reduce releases to air/water/soil of chemicals and all wastes throughout their life cycle (Target 12.4) | Total air emission (GHGs, ODS, NOx, SOx, POP, VOC, HAP, PM) during the LC.                                                                                            | ↓   | Produced products. Re-work                |
|                                                                                                                | Total weight of waste by type and disposal method during the LC.                                                                                                      | ↓   |                                           |
|                                                                                                                | Total water discharge by quality and destination during the LC.                                                                                                       | ↓   |                                           |
| 2.123. Reduce waste generation (Target 12.5)                                                                   | Total weight of waste by type and disposal method.                                                                                                                    | ↓   |                                           |
|                                                                                                                | Percentage of reclaimed products and their packaging materials for each product category.                                                                             | ↑   |                                           |
| 2.124. Publication of sustainability reports (Target 12.6)                                                     | Comprehensiveness of sustainability report (issues covered).                                                                                                          | ↑   |                                           |
|                                                                                                                | Percentage of operations with implemented social impact assessments.                                                                                                  | ↑   |                                           |
|                                                                                                                | Percentage of operations with implemented environmental impact assessments.                                                                                           | ↑   |                                           |
| 2.125. Increase the use of sustainable public procurement practices (Target 12.7)                              | Eco-labels/Sustainable certifications for products.                                                                                                                   | ↑   |                                           |
|                                                                                                                | Proportion of suppliers ISO 14001 certified.                                                                                                                          | ↑   |                                           |
|                                                                                                                | Percentage of new suppliers that were screened using labor practices criteria.                                                                                        | ↑   |                                           |
|                                                                                                                | Percentage of new suppliers that were screened using environmental criteria.                                                                                          | ↑   |                                           |
|                                                                                                                | Percentage of new suppliers that were screened using human rights criteria.                                                                                           | ↑   |                                           |
|                                                                                                                | Percentage of new suppliers that were screened using criteria for impacts on society.                                                                                 | ↑   |                                           |
|                                                                                                                |                                                                                                                                                                       |     |                                           |
| 2.126. Promote education about sustainable development (Target 12.8)                                           | Accessibility of product information to customers.                                                                                                                    | ↑   | Customer satisfaction                     |
|                                                                                                                | Educational initiatives on sustainable development for customers and suppliers.                                                                                       | ↑   |                                           |
| 2.129. Reduce the use of fossil-fuel (Target 12.c)                                                             | Total fossil-fuel energy consumption within the company.                                                                                                              | ↓   |                                           |
|                                                                                                                | Total fossil-fuel energy consumption of suppliers'.                                                                                                                   | ↓   |                                           |
|                                                                                                                | Total fossil-fuel energy consumption of logistics.                                                                                                                    | ↓   |                                           |
| 2.130. Increase resilience and adaptive capacity to natural disasters (Target 13.1)                            | Risk management related to climate change.                                                                                                                            | Y/N |                                           |
|                                                                                                                | Environmental protection expenditure.                                                                                                                                 | ↑   | Investments in improvements               |
| 2.132. Improve education on climate change mitigation/adaptation (Target 13.3)                                 | Training and education in climate change projects for stakeholders.                                                                                                   | ↑   |                                           |
| 2.133. Increase number of CC mitigation actions (Target 13.3)                                                  | Total environmental expenditures.                                                                                                                                     | ↑   | Investments in improvements               |
|                                                                                                                | Total investment for pollution prevention and control (air, water, and solid waste).                                                                                  | ↑   | Investments in improvements               |
| 2.135. Reduce marine pollution (Target 14.1)                                                                   | Total water discharge by quality and destination.                                                                                                                     | ↓   |                                           |
|                                                                                                                | Total number and volume of significant spills.                                                                                                                        | ↓   |                                           |
| 2.160. Reduce violence and deaths rates related to violence (Target 16.1)                                      | Registered cases of workplace violence and harassment.                                                                                                                | ↓   | Employees' satisfaction. Work environment |
| 2.161. Reduce abuse, exploitation, trafficking and violence against children (Target 16.2)                     | Operations and suppliers identified as having significant risk for incidents of child labor.                                                                          | 0   |                                           |
| 2.162. Promote the rule of law at national and international levels (Target 16.3)                              | Total monetary value of significant fines for non-compliance with laws and regulations.                                                                               | ↓   | Total cost                                |
|                                                                                                                | Total number of non-monetary sanctions for non-compliance with laws and regulations.                                                                                  | ↓   |                                           |
| 2.164. Reduce corruption and bribery (Target 16.5)                                                             | Total number and percentage of operations assessed for risks related to corruption and the significant risks identified.                                              | ↓   |                                           |
|                                                                                                                | Total number and percentage of employees that the organization's anti-corruption policies and procedures have been communicated to, broken down by employee category. | ↑   |                                           |
|                                                                                                                | Total number of confirmed incidents of corruption.                                                                                                                    | ↓   |                                           |
|                                                                                                                | Stakeholder engagement plans based on stakeholder mapping.                                                                                                            | ↑   |                                           |

|                                                                                                                   |                                                                                                                           |     |                                                         |
|-------------------------------------------------------------------------------------------------------------------|---------------------------------------------------------------------------------------------------------------------------|-----|---------------------------------------------------------|
| 2.166. Improve decision-making at all levels (responsive, inclusive, participatory, representative) (Target 16.7) | Local community consultation committees and processes that include vulnerable groups.                                     | ↑   |                                                         |
|                                                                                                                   | Works councils, occupational health and safety committees, and other employee representation bodies to deal with impacts. | ↑   |                                                         |
|                                                                                                                   | Percentage of total workforce represented in formal joint management.                                                     | ↑   | Employees empowerment                                   |
| 2.169. Improve public access to information (Target 16.10)                                                        | Publicly available missions and values statement.                                                                         | Y/N |                                                         |
|                                                                                                                   | Publicly available strategy and performance results.                                                                      | Y/N | Unification of organizational and individual objectives |
| 2.170. Protect fundamental freedoms (Target 16.10)                                                                | Total number of substantiated complaints regarding breaches of employees' and customers' privacy and losses of data.      | ↓   |                                                         |
| 2.172. Reduce discrimination and harassment (Target 16.b)                                                         | Total number of incidents of discrimination and harassment.                                                               | 0   | Employees' satisfaction. Work environment               |
| 2.188. Improve public, public-private and civil society partnership (Target 17.17)                                | The extent to which the government is present in the shareholding structure.                                              | -   |                                                         |
| 2.190. Improve measurement of progress on sustainable development (Target 17.19)                                  | Comprehensiveness of sustainability report (issues covered).                                                              | ↑   |                                                         |

| Sustainability criteria for manufacturing                                                   | Indicators                                                                                                  | Desired direction | Elements of organizational model             |
|---------------------------------------------------------------------------------------------|-------------------------------------------------------------------------------------------------------------|-------------------|----------------------------------------------|
| 1.1. Reduce cost of product during the whole LC of the product                              | Total product cost.                                                                                         | ↓                 | Total cost. Production cost. Transport cost. |
| 1.2. Reduce noise from all processes                                                        | Noise level in the factory.                                                                                 | ↓                 |                                              |
| 1.3. Improve safety of technologies                                                         | Total number of safety incidents.                                                                           | 0                 |                                              |
| 1.4. Reduce pollution to air during the whole LC of the product                             | Total air emission (GHGs, ODS, NOx, SOx, POP, VOC, HAP, PM) at material extrusion.                          | ↓                 |                                              |
|                                                                                             | Total air emission (GHGs, ODS, NOx, SOx, POP, VOC, HAP, PM) at the suppliers.                               | ↓                 |                                              |
|                                                                                             | Total air emission (GHGs, ODS, NOx, SOx, POP, VOC, HAP, PM) during the production.                          | ↓                 | Produced products.                           |
|                                                                                             | Total air emission (GHGs, ODS, NOx, SOx, POP, VOC, HAP, PM) during the distribution.                        | ↓                 |                                              |
|                                                                                             | Total air emission (GHGs, ODS, NOx, SOx, POP, VOC, HAP, PM) during the use.                                 | ↓                 |                                              |
| 1.5. Improve customers satisfaction                                                         | Customer satisfaction.                                                                                      | ↑                 | Customer satisfaction.                       |
| 1.6. Minimize the use of non-renewable natural resources during the whole LC of the product | Ratio of non-renewable natural resources compared to renewable during the production.                       | ↓                 |                                              |
|                                                                                             | Ratio of non-renewable natural resources compared to renewable during the material extrusion.               | ↓                 |                                              |
|                                                                                             | Ratio of non-renewable natural resources compared to renewable during the transportation.                   | ↓                 |                                              |
|                                                                                             | Ratio of non-renewable natural resources compared to renewable at the suppliers.                            | ↓                 |                                              |
| 1.7. Increase value creation for society                                                    | End users' quality of life.                                                                                 | ↑                 |                                              |
| 1.8. Minimize the use of non-renewable energy during the LC of the product                  | Ratio of non-renewable energy compared to renewable during the production.                                  | ↓                 |                                              |
|                                                                                             | Ratio of non-renewable energy compared to renewable during the material extrusion.                          | ↓                 |                                              |
|                                                                                             | Ratio of non-renewable energy compared to renewable during the transportation.                              | ↓                 |                                              |
|                                                                                             | Ratio of non-renewable energy compared to renewable at the suppliers.                                       | ↓                 |                                              |
| 1.9. Minimize the use of land during the product LC                                         | Use of land for extrusion & production.                                                                     | ↓                 |                                              |
| 1.10. Maximize new opportunities for organization                                           | Number of projects with research institutes.                                                                | ↑                 | Participation in research projects.          |
|                                                                                             | Investments in R&D, NOK & % from total investments.                                                         | ↑                 | Investments in improvements.                 |
| 1.11. Reduce generation of waste during the whole LC of the product                         | Total weight of waste by type and disposal method during the LC.                                            | ↓                 |                                              |
|                                                                                             | Total scrap produced.                                                                                       | ↓                 | Products out of specification.               |
| 1.12. Ensure competitiveness of the product                                                 | Cost of product compared to similar products.                                                               | ↓                 | Product price. Total cost.                   |
|                                                                                             | Quality of product compared to competitors.                                                                 | ↑                 | Product quality.                             |
| 1.13. Ensure competitiveness of the organization                                            | Organizational income.                                                                                      | ↑                 | Income.                                      |
|                                                                                             | Organizational image.                                                                                       | ↑                 |                                              |
|                                                                                             | Technological advancement.                                                                                  | ↑                 | Innovative potential.                        |
| 1.14. Improve employees' rights and development                                             | Employees' rights to privacy, fair compensation, and freedom from discrimination.                           | ↑                 |                                              |
|                                                                                             | Employees training and education.                                                                           | ↑                 | Employees training.                          |
|                                                                                             | Number of courses/conferences/workshops attended.                                                           | ↑                 | Employees training.                          |
|                                                                                             | Investment in employee training and education as percentage of net sales.                                   | ↑                 | Employees training. Competence.              |
| 1.15. Improve operational effectiveness                                                     | Relationship between the planned production cycle to complete a batch and the actual production cycle time. | ↑                 | OEE.                                         |
|                                                                                             | Total defects (requires rework, repair, reprocessing).                                                      | ↓                 | Re-work. Products out of specification.      |
|                                                                                             | OEE.                                                                                                        | ↑                 | OEE.                                         |



|                                                                                                                 |                                                                                                                                                              |   |                                                             |
|-----------------------------------------------------------------------------------------------------------------|--------------------------------------------------------------------------------------------------------------------------------------------------------------|---|-------------------------------------------------------------|
|                                                                                                                 | Yield loss.                                                                                                                                                  | ↓ | Quality yield.                                              |
| 1.16. Improve operational efficiency                                                                            | Output ratio in time unit (actual versus planned output).                                                                                                    | ↑ | Production orders. Produced products.                       |
|                                                                                                                 | Ratio of the value added production time to total production time.                                                                                           | ↑ | OEE.                                                        |
|                                                                                                                 | Changeover time.                                                                                                                                             | ↓ | Changeover frequency.                                       |
| 1.17. Ensure social equity                                                                                      | Difference between access to benefits among categories of employees.                                                                                         | ↓ | Salary/Benefits.                                            |
| 1.18. Increase functionality of the product                                                                     | Product's functionality perceived by customer.                                                                                                               | ↑ | Customer satisfaction.                                      |
| 1.19. Protect personal health during the whole LC of the product/service                                        | Health impact of the product in use.                                                                                                                         | ↓ |                                                             |
|                                                                                                                 | Type of injury and rates of injury, occupational diseases, lost days, and absenteeism, and total number of work-related fatalities, by region and by gender. | ↓ | Sick leave.                                                 |
|                                                                                                                 | Workers with high incidence or high risk of diseases related to their occupation.                                                                            | ↓ |                                                             |
| 1.20. Increase innovation (through innovative techniques/ methods/ technologies/ practices/ products/ services) | Total number of implemented innovative practices.                                                                                                            | ↑ | Innovative potential. Investments in improvements.          |
|                                                                                                                 | Return on implementation of innovative practice.                                                                                                             | ↑ |                                                             |
|                                                                                                                 | Proportion of employees by level of education.                                                                                                               | - | Competence.                                                 |
| 1.21. Improve information security and cybersecurity                                                            | Information security incidents.                                                                                                                              | ↓ |                                                             |
| 1.22. Enhance learning of employees                                                                             | Investment in employee training and education as percentage of net sales.                                                                                    | ↑ | Employees training. Competence.                             |
|                                                                                                                 | Number of courses/conferences/workshops attended.                                                                                                            | ↑ | Employees training.                                         |
| 1.23. Improve conditions of work and social protection for employees                                            | Conditions of work evaluated by employees.                                                                                                                   | ↑ | Work environment.                                           |
|                                                                                                                 | Paid days off.                                                                                                                                               | ↑ |                                                             |
| 1.24. Increase organizational productivity                                                                      | Ratio of produced to ordered products.                                                                                                                       | ↑ | Production orders. Produced products.                       |
|                                                                                                                 | Ratio of sales per employee.                                                                                                                                 | ↑ |                                                             |
|                                                                                                                 | Ratio of produced products to labour-hours.                                                                                                                  | ↑ |                                                             |
| 1.25. Increase organizational profitability                                                                     | Profit.                                                                                                                                                      | ↑ | Revenue.                                                    |
|                                                                                                                 | Manufacturing cost as a percentage of revenue.                                                                                                               | ↓ | Production cost. Revenue.                                   |
|                                                                                                                 | Liquidity.                                                                                                                                                   | ↑ |                                                             |
| 1.26. Improve quality of the product                                                                            | Total number of rejected/returned products by customer.                                                                                                      | ↓ | Customer complaints.                                        |
|                                                                                                                 | Product durability.                                                                                                                                          | ↑ | Product quality.                                            |
| 1.27. Improve quality of the process                                                                            | Yield for process.                                                                                                                                           | ↑ | Process quality.                                            |
| 1.28. Improve quality of systems                                                                                | Yield for production system.                                                                                                                                 | ↑ |                                                             |
| 1.29. Improve reliability of the product                                                                        | Failure rate of product in use.                                                                                                                              | ↓ |                                                             |
| 1.30. Improve reliability of processes                                                                          | Mean Time Between Failure in a process.                                                                                                                      | ↑ | Equipment/Tools failure.                                    |
|                                                                                                                 | Failure Rate of process.                                                                                                                                     | ↓ | Equipment/Tools failure.                                    |
|                                                                                                                 | Ratio of corrective maintenance time in relation to the total maintenance (planned and corrective).                                                          | ↓ | Preventive maintenance. Time used for reactive maintenance. |
| 1.31. Improve reliability of technologies                                                                       | Mean Time Between Failure for equipment.                                                                                                                     | ↑ | Equipment/Tools failure.                                    |
|                                                                                                                 | Failure Rate of equipment.                                                                                                                                   | ↓ | Equipment/Tools failure.                                    |
| 1.32. Improve reliability of systems                                                                            | Mean Time Between Failure for production system.                                                                                                             | ↑ | Equipment/Tools failure.                                    |

|                                                                              |                                                                                                                                                                                               |   |                              |
|------------------------------------------------------------------------------|-----------------------------------------------------------------------------------------------------------------------------------------------------------------------------------------------|---|------------------------------|
|                                                                              | Failure Rate of production system.                                                                                                                                                            | ↓ | Equipment/Tools failure.     |
|                                                                              | Number of emergency events or unplanned shutdowns                                                                                                                                             | ↓ | Unplanned stops.             |
| 1.33. Improve safety of the product                                          | Total number of incidents of non-compliance with regulations and voluntary codes concerning the health and safety impacts of products.                                                        | ↓ |                              |
| 1.34. Improve safety of processes                                            | Hours of safety training per employee.                                                                                                                                                        | ↑ | Employees training.          |
|                                                                              | Safety incidents for process.                                                                                                                                                                 | 0 |                              |
| 1.35. Ensure fairness on employee wages and benefits                         | Minimal wage for workers per year.                                                                                                                                                            | ↑ | Salary/Benefits.             |
|                                                                              | Ration of local minimum wage to the organization's entry level wage by gender.                                                                                                                | ↑ | Salary/Benefits.             |
| 1.36. Reduce employee turnover                                               | Employees turnover per year.                                                                                                                                                                  | ↓ | Turnover.                    |
| 1.37. Protect biodiversity                                                   | Investments in biodiversity.                                                                                                                                                                  | ↑ |                              |
| 1.38. No bribery and corruption                                              | Total number and percentage of employees that the organization's anti-corruption policies and procedures have been communicated to, broken down by employee category.                         | ↑ |                              |
|                                                                              | Total number of confirmed incidents of corruption.                                                                                                                                            | ↓ |                              |
| 1.39. Improve professional knowledge and competence of employees             | Percentage of employees who agree that their knowledge and competence has been increased.                                                                                                     | ↑ | Competence.                  |
| 1.40. Improve safety of systems                                              | Safety incidents in production systems.                                                                                                                                                       | 0 |                              |
| 1.41. Ensure compatible salary                                               | Rate of salary compared to average in industry.                                                                                                                                               | ↑ | Salary/Benefits.             |
| 1.42. Reduce pollution to soil during the whole LC of the product            | Pollution to soil in production.                                                                                                                                                              | ↓ |                              |
|                                                                              | Pollution to soil in suppliers' production.                                                                                                                                                   | ↓ |                              |
|                                                                              | Pollution to soil during transportation.                                                                                                                                                      | ↓ |                              |
|                                                                              | Pollution to soil during the use.                                                                                                                                                             | ↓ |                              |
| 1.43. Improve employees satisfaction                                         | Percentage of employees satisfied with their work.                                                                                                                                            | ↑ | Employees satisfaction.      |
|                                                                              | Percentage of employees feel motivated at work.                                                                                                                                               | ↑ | Motivation.                  |
|                                                                              | Total grievances registered and resolved.                                                                                                                                                     | ↓ | Conflicts. Work environment. |
| 1.44. Minimize the use of toxic materials during the whole LC of the product | Toxic materials in production.                                                                                                                                                                | ↓ |                              |
|                                                                              | Toxic materials in product.                                                                                                                                                                   | ↓ |                              |
| 1.45. Increase employee involvement and empowerment                          | Percentage of employees who agree that company involve and encourage employees.                                                                                                               | ↑ | Employees empowerment.       |
|                                                                              | Percentage of employees that are shareholders in the company.                                                                                                                                 | ↑ |                              |
|                                                                              | Number of suggested improvements by employee.                                                                                                                                                 | ↑ |                              |
| 1.46. Provide democratic processes and accountable governance structures     | Percentage of total employees covered by collective bargaining agreements.                                                                                                                    | ↑ |                              |
|                                                                              | Composition of the governance body and its committees by: executive or non-executive, gender, competences relating to economic, environmental and social impacts, stakeholder representation. | - |                              |
|                                                                              | Organization's openness to stakeholder review and participation in decision-making process.                                                                                                   | ↑ |                              |
| 1.47. Minimize the use of water during the whole LC of the product           | Total water withdrawal in production.                                                                                                                                                         | ↓ |                              |
|                                                                              | Total water withdrawal by suppliers.                                                                                                                                                          | ↓ |                              |
|                                                                              | Total water withdrawal in use.                                                                                                                                                                | ↓ |                              |
| 1.48. Increasing the wealth of the society                                   | Total number and rates of new employee hires.                                                                                                                                                 | ↑ |                              |
|                                                                              | Societal investment.                                                                                                                                                                          | ↑ |                              |
| 1.49. Improve the quality of life (employees, customers, and society)        | Quality of life evaluated by employees.                                                                                                                                                       | ↑ |                              |

|                                                                    |                                                                                                                                                              |   |                                           |
|--------------------------------------------------------------------|--------------------------------------------------------------------------------------------------------------------------------------------------------------|---|-------------------------------------------|
| 1.50. Decrease in the frequency of environmental accidents         | Environmental accidents in production.                                                                                                                       | 0 |                                           |
| 1.51. Provide equitable opportunities for all employees            | Percentage of employees feeling equitable opportunities for development.                                                                                     | ↑ | Employees satisfaction.                   |
| 1.52. Ensure organizational survival                               | Market share.                                                                                                                                                | ↑ |                                           |
|                                                                    | Organizational income.                                                                                                                                       | ↑ | Income.                                   |
|                                                                    | Return on average capital employed (ROACE).                                                                                                                  | ↑ |                                           |
| 1.53. Encourage workplace diversity                                | Percentage of employees within the company in each category, gender, age (under 30 years old, 30-50 years old, over 50 years old), minority groups.          | - |                                           |
| 1.54. Ensure acceptable working hours                              | Hours of overwork per employee.                                                                                                                              | ↓ | Excessive work overload per employee.     |
|                                                                    | Percentage of working hours outside of normal working hours.                                                                                                 | ↓ |                                           |
| 1.55. Improve company reputation                                   | Reputation of the company.                                                                                                                                   | ↑ | New customers.                            |
|                                                                    | Number of complaints received from the community.                                                                                                            | ↓ |                                           |
|                                                                    | Total number of sanctions for noncompliance with laws and regulations.                                                                                       | ↓ |                                           |
| 1.56. Maximize effectiveness of product over the whole LC          | Duration of product life.                                                                                                                                    | ↑ |                                           |
| 1.57. Reduce pollution to water during the whole LC of the product | Quality of discharged water from production.                                                                                                                 | ↑ |                                           |
|                                                                    | Quality of discharged water at suppliers' sites.                                                                                                             | ↑ |                                           |
|                                                                    | Total amount of pollutants to water during transportation.                                                                                                   | ↓ |                                           |
|                                                                    | Total amount of pollutants to water during the use.                                                                                                          | ↓ |                                           |
| 1.58. Ensure conformance to laws and regulations                   | Cases of law and regulations violation.                                                                                                                      | ↓ |                                           |
| 1.59. Ensure fair competition                                      | Total number of legal actions for anti-competitive behavior, anti-trust, and monopoly practices.                                                             | ↓ |                                           |
| 1.60. Increase productivity of employees                           | Percentage of employees agreed that their productivity has increased.                                                                                        | ↑ | Perf_Productivity.                        |
|                                                                    | Ratio of monthly product value shipped to monthly labor expenditures,                                                                                        | ↑ |                                           |
| 1.61. Improve occupational health and safety                       | Type of injury and rates of injury, occupational diseases, lost days, and absenteeism, and total number of work-related fatalities, by region and by gender. | ↓ | Sick leave.                               |
| 1.62. Ensure freedom of association and collective bargaining      | Percentage of employees feeling the freedom of associations.                                                                                                 | ↑ | Employees satisfaction.                   |
|                                                                    | Number of employees in associations.                                                                                                                         | ↑ |                                           |
|                                                                    | Total operations and suppliers in which employee rights to exercise freedom of association or collective bargaining may be violated or at significant risk.  | ↓ |                                           |
| 1.63. Reduce discrimination                                        | Total number of incidents of discrimination and harassment.                                                                                                  | 0 | Employees satisfaction. Work environment. |
| 1.64. Improve restoration of natural habitats                      | Investments in restoration of natural habitats.                                                                                                              | ↑ | Investments in improvements.              |
| 1.65. Increase employment creation                                 | Net employment creation expressed as percentage contribution to employment in a region.                                                                      | ↑ |                                           |
|                                                                    | Total number and rates of new employee hires.                                                                                                                | ↑ |                                           |
|                                                                    | Proportion of orders (in NOK) from local suppliers.                                                                                                          | ↑ |                                           |
| 1.66. Improve well-being of local communities                      | Investments into community projects (e.g., schools, hospitals, infrastructure) as percentage of revenues.                                                    | ↑ | Revenue.                                  |
|                                                                    | Local community development programs based on local communities' needs.                                                                                      | ↑ |                                           |
|                                                                    | Proportion of employees hired from the local community.                                                                                                      | ↑ |                                           |

|                                                   |                                                                                                                                              |   |                              |
|---------------------------------------------------|----------------------------------------------------------------------------------------------------------------------------------------------|---|------------------------------|
|                                                   | Proportion of orders (in NOK) from local suppliers.                                                                                          | ↑ |                              |
| 1.67. Ensure human rights for employees           | Cases of violation of human rights.                                                                                                          | 0 |                              |
|                                                   | Perception of company's performance on human rights by its employees.                                                                        | ↑ |                              |
| 1.68. Improve work-life balance for employees     | Total hours of overwork.                                                                                                                     | ↓ |                              |
| 1.69. Respect indigenous rights                   | Total number of incidents of violations involving rights of indigenous peoples.                                                              | 0 |                              |
| 1.70. Responsible political involvement           | Participation in public policy development.                                                                                                  | ↑ |                              |
| 1.71. Increase social investment                  | Total social investment.                                                                                                                     | ↑ |                              |
| 1.72. Increase supplier support and collaboration | Improvements projects for suppliers.                                                                                                         | ↑ | Investments in improvements. |
|                                                   | Suppliers owned or staffed by members of vulnerable, marginalized or underrepresented social groups.                                         | ↑ |                              |
| 1.73. Ensure customers' rights                    | Total number of substantiated complaints regarding breaches of customer privacy and losses of customer data                                  | ↓ | Customers complaints.        |
| 1.74. Increase stakeholder engagement             | Percentage of stakeholders agreed that they are engaged in decision-making.                                                                  | ↑ |                              |
|                                                   | Policy and procedures involving consultation and negotiation with employees over changes in the company (e.g., restructuring, redundancies). | ↑ | Employees empowerment.       |
|                                                   | Summary of the policy on stakeholder involvement.                                                                                            | - |                              |
| 1.75. Threat suppliers fairly                     | Ratio of supplier price to market price.                                                                                                     | ↑ | Price of raw materials.      |

## CSA tool for Company B

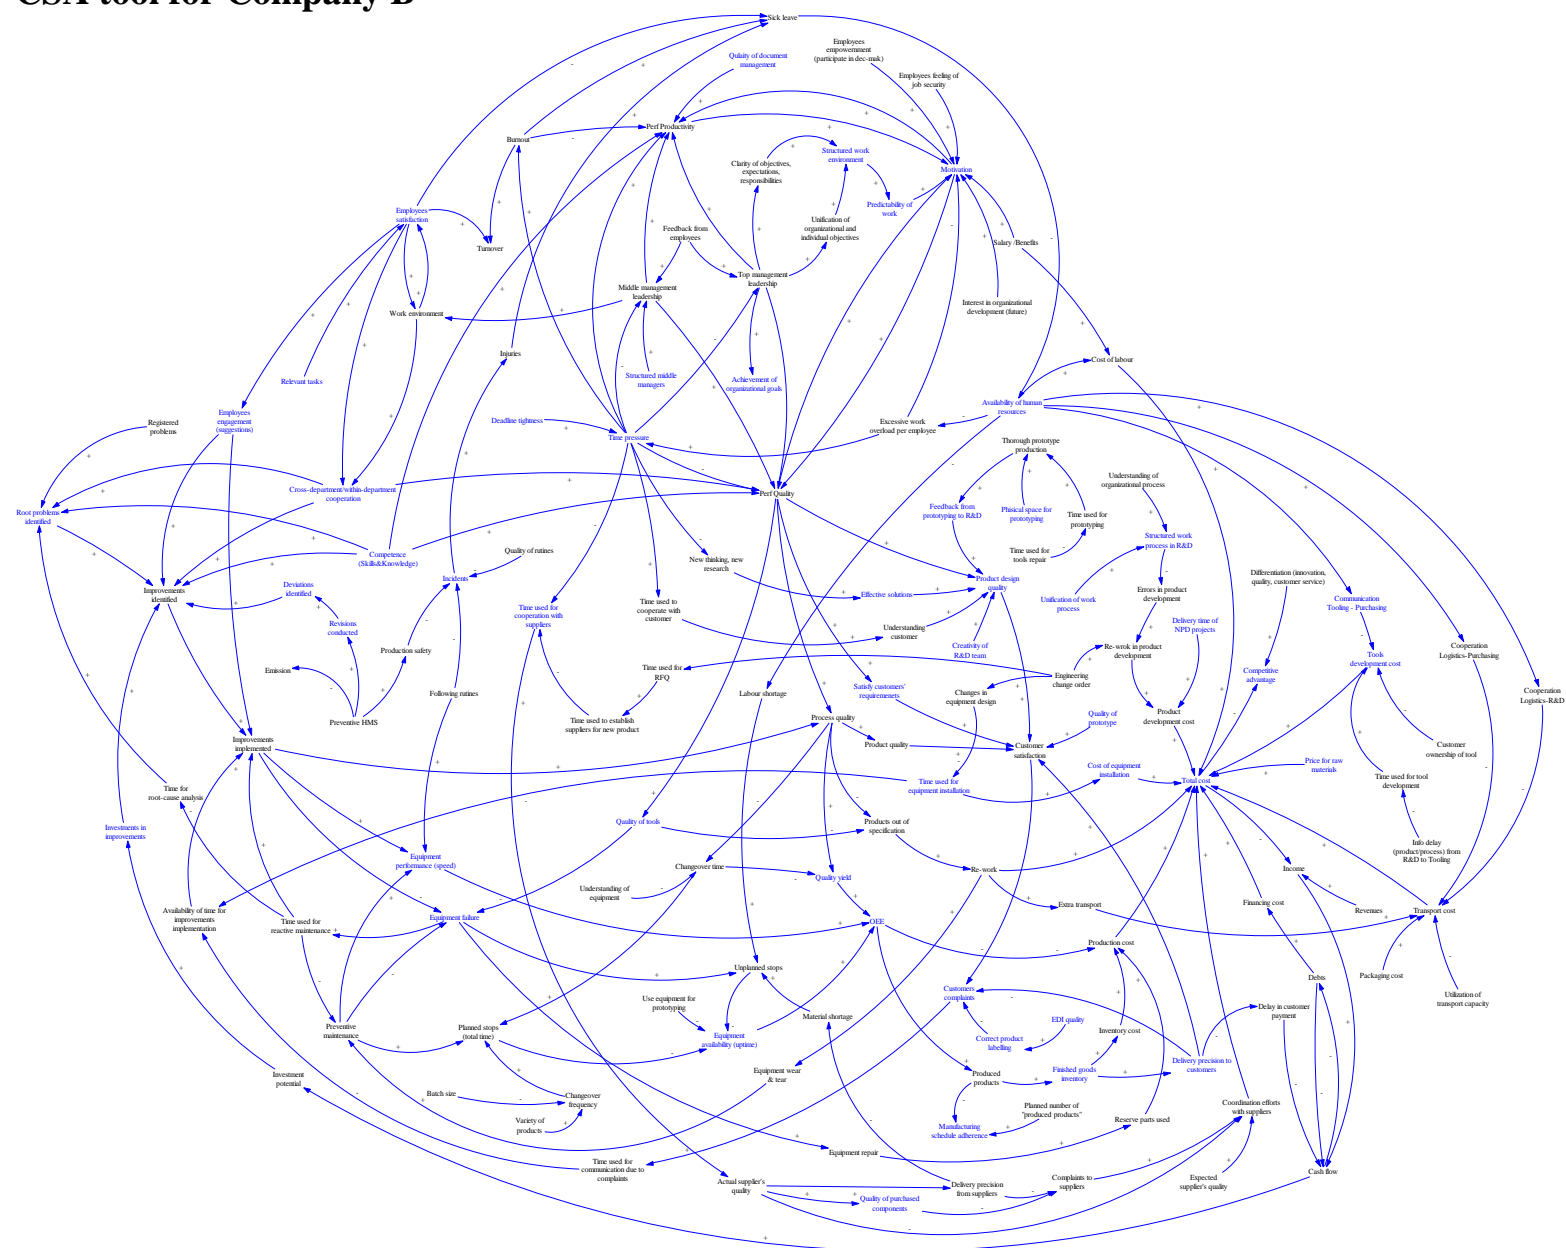

| Sustainability criteria for world                                                                             | Indicators                                                                                                                                                   | Desired direction | Element of organizational model       |
|---------------------------------------------------------------------------------------------------------------|--------------------------------------------------------------------------------------------------------------------------------------------------------------|-------------------|---------------------------------------|
| 2.1. Reduce extreme poverty (Target 1.1, 1.2)                                                                 | Minimal wage for workers per year.                                                                                                                           | ↑                 | Salary/Benefits.                      |
|                                                                                                               | Total tax paid per year.                                                                                                                                     | ↑                 | Revenue.                              |
|                                                                                                               | Range of benefits for workers.                                                                                                                               | ↑                 | Salary/Benefits.                      |
|                                                                                                               | Ratio of supplier price to market price.                                                                                                                     | ↑                 | Price for raw materials.              |
| 2.2. Improve nationally social protection systems and measures (Target 1.3)                                   | Social security benefits for workers.                                                                                                                        | ↑                 | Salary/Benefits.                      |
|                                                                                                               | Number of employees with insurance, per type of insurance.                                                                                                   | ↑                 |                                       |
| 2.3. Ensure equal rights to basic services (e.g., new technology) (Target 1.4)                                | Number of new solutions/techniques/technologies implemented.                                                                                                 | ↑                 | New thinking, new research.           |
| 2.4. Reduce exposure and vulnerability to climate-related extreme events. (Target 1.5)                        | Risk management related to climate-related events.                                                                                                           | Y/N               |                                       |
|                                                                                                               | Investments in resilience to environmental hazards and resource scarcity, NOK & % of all investments.                                                        | ↑                 | Investment potential.                 |
| 2.19. Reduce maternal mortality (Target 3.1)                                                                  | Maternity/paternity leave.                                                                                                                                   | ↑                 |                                       |
|                                                                                                               | Total number of incidents of discrimination against pregnancy.                                                                                               | ↓                 |                                       |
|                                                                                                               | Decent working conditions for female employees.                                                                                                              | ↑                 | Work environment                      |
| 2.22. Reduce mortality from non-communicable diseases (Target 3.4)                                            | Type of injury and rates of injury, occupational diseases, lost days, and absenteeism, and total number of work related fatalities, by region and by gender. | ↓                 | Injuries.                             |
|                                                                                                               | Total hours of overwork.                                                                                                                                     | ↓                 |                                       |
|                                                                                                               | Hours of overwork per employee.                                                                                                                              | ↓                 | Excessive work overload per employee. |
|                                                                                                               | Type of benefits for parents.                                                                                                                                | -                 | Salary/Benefits.                      |
|                                                                                                               | Total air emission (GHGs, ODS, NOx, SOx, POP, VOC, HAP, PM).                                                                                                 | ↓                 | Emission.                             |
|                                                                                                               | Total number and volume of significant spills.                                                                                                               | ↓                 |                                       |
|                                                                                                               | Total water discharge by quality and destination.                                                                                                            | ↓                 |                                       |
|                                                                                                               | Human health impact (e.g., ionizing radiation, human toxicity, respiratory inorganics).                                                                      | ↓                 |                                       |
|                                                                                                               |                                                                                                                                                              |                   |                                       |
| 2.24. Reduce number of deaths and injuries from road traffic accidents (Target 3.6)                           | Legal complaints against vehicles owned by company.                                                                                                          | ↓                 |                                       |
| 2.26. Increase health coverage (Target 3.8)                                                                   | Life insurance, disability, and invalidity coverage.                                                                                                         | ↑                 |                                       |
| 2.27. Reduce deaths and illness from hazardous chemicals (Target 3.9)                                         | Total amount of hazardous chemicals used in production.                                                                                                      | ↓                 |                                       |
|                                                                                                               | Total amount of hazardous chemicals in a product.                                                                                                            | ↓                 |                                       |
| 2.28. Reduce deaths and illness from air, water, and soil pollution and contamination (Target 3.9)            | Total air emission (GHGs, ODS, NOx, SOx, POP, VOC, HAP, PM).                                                                                                 | ↑                 | Emission.                             |
|                                                                                                               | Water quality within the company.                                                                                                                            | ↑                 |                                       |
|                                                                                                               | Total water discharge by quality and destination.                                                                                                            | ↓                 |                                       |
|                                                                                                               | Total weight of waste by type and disposal method.                                                                                                           | ↓                 |                                       |
| 2.33. Ensure free, equitable and quality primary and secondary education for all girls and boys (Target 4.1)  | Operations and suppliers identified as having significant risk for incidents of child labor.                                                                 | 0                 |                                       |
| 2.34. Ensure access to quality early childhood development, care and pre-primary education (Target 4.2)       | Type of support for parents.                                                                                                                                 | -                 |                                       |
| 2.35. Ensure equal access to affordable and quality technical, vocational and tertiary education (Target 4.3) | Average hours of training per year per employee by gender, and by employee category.                                                                         | ↑                 | Competence.                           |
|                                                                                                               | Programs for skills management and lifelong learning that support the continued employability of employees.                                                  | ↑                 |                                       |

|                                                                                                                              |                                                                                                                                                         |     |                                           |
|------------------------------------------------------------------------------------------------------------------------------|---------------------------------------------------------------------------------------------------------------------------------------------------------|-----|-------------------------------------------|
| 2.36. Increase the number of youth and adults with relevant skills for development/decent jobs/entrepreneurship (Target 4.4) | Percentage of employees receiving regular performance and career development reviews, by gender and age.                                                | ↑   |                                           |
|                                                                                                                              | Programs for skills management and lifelong learning that support the continued employability of employees.                                             | ↑   |                                           |
| 2.37. Eliminate genders disparities in education (Target 4.5)                                                                | Training, internship programs, and further education without discrimination.                                                                            | ↑   | Competence.                               |
| 2.38. Ensure access to education/training for vulnerable (Target 4.5)                                                        | Percentage of employees receiving regular performance and career development reviews, by gender and by employee category.                               | ↑   |                                           |
| 2.40. Improve knowledge and skills to promote SD (Target 4.7)                                                                | Percentage of employees trained in sustainability initiatives and sustainable development, including specific topics on women's rights, water use, etc. | ↑   |                                           |
| 2.44. Reduce discrimination against all women/girls (Target 5.1)                                                             | Percentage of employees in the company by gender.                                                                                                       | -   |                                           |
|                                                                                                                              | Percentage of women in senior executive and senior and middle management ranks.                                                                         | ↑   |                                           |
|                                                                                                                              | Total number of incidents of discrimination and harassment.                                                                                             | 0   | Work environment.                         |
|                                                                                                                              | Total number of employees that took parental leave, by gender.                                                                                          | -   |                                           |
| 2.45. Eliminate violence against women (Target 5.2)                                                                          | Registered cases of workplace violence and harassment against women.                                                                                    | 0   | Work environment. Employees satisfaction. |
| 2.47. Recognize unpaid domestic work and care (Target 5.4.)                                                                  | Benefits provided to full-time employees compared to temporary/part-time employees.                                                                     | ↓   | Salary/Benefits.                          |
|                                                                                                                              | Flexible work option.                                                                                                                                   | ↑   |                                           |
|                                                                                                                              | Total number of employees that took parental leave, by gender.                                                                                          | -   |                                           |
| 2.48. Ensure equal opportunities for women for leadership (Target 5.5)                                                       | Percentage of women in senior executive and senior and middle management ranks.                                                                         | ↑   |                                           |
| 2.53. Promote gender equality (Target 5.c)                                                                                   | Percentage of employees in the company by gender.                                                                                                       | -   |                                           |
|                                                                                                                              | Percentage of women in senior executive and senior and middle management ranks.                                                                         | ↑   |                                           |
|                                                                                                                              | Ratio of basic salary and remuneration of women to men by employee category.                                                                            | -   | Salary/Benefits.                          |
| 2.54. Increase access to safe and affordable drinking water (Target 6.1)                                                     | Total water withdrawal.                                                                                                                                 | ↓   |                                           |
|                                                                                                                              | Total volume of water recycled and reused by the company.                                                                                               | ↑   |                                           |
|                                                                                                                              | Total water discharge by quality and destination.                                                                                                       | ↓   |                                           |
| 2.55. Increase sanitation and hygiene (Target 6.2)                                                                           | Waste management.                                                                                                                                       | ↑   |                                           |
|                                                                                                                              | Access to sanitation facility (% of employees with access to a sanitation facility).                                                                    | ↑   |                                           |
|                                                                                                                              | Sanitation and hygiene management.                                                                                                                      | Y/N |                                           |
| 2.56. Improve water quality (Target 6.3)                                                                                     | Total water discharge by quality and destination.                                                                                                       | ↓   |                                           |
| 2.57. Increase water-use efficiency (Target 6.4)                                                                             | Water efficiency (consumption per unit produced) within the company.                                                                                    | ↑   |                                           |
|                                                                                                                              | Water efficiency (consumption per unit produced) at the suppliers' sites.                                                                               | ↑   |                                           |
|                                                                                                                              | Total water discharge by quality and destination                                                                                                        | ↓   |                                           |
| 2.58. Reduce water scarcity (Target 6.4)                                                                                     | Total water withdrawal.                                                                                                                                 | ↓   |                                           |
|                                                                                                                              | Total volume of water recycled and reused by the company.                                                                                               | ↑   |                                           |
| 2.60. Protect and restore water-related ecosystems (Target 6.6)                                                              | Total water discharge by quality and destination.                                                                                                       | ↓   |                                           |
|                                                                                                                              | Investments in environmental protection.                                                                                                                | ↑   |                                           |
| 2.64. Increase the use of renewable energy (Target 7.2)                                                                      | Proportion of renewable energy used in the company.                                                                                                     | ↑   |                                           |
| 2.65. Improve energy efficiency (Target 7.3)                                                                                 | Energy efficiency (consumption per unit produced).                                                                                                      | ↑   | Produced products.                        |

|                                                                                      |                                                                                           |   |                                                       |
|--------------------------------------------------------------------------------------|-------------------------------------------------------------------------------------------|---|-------------------------------------------------------|
|                                                                                      | Energy intensity (consumption per monetary unit of sales).                                | ↓ | Produced products.                                    |
| 2.69. Sustain economic growth (Target 8.1)                                           | Revenues.                                                                                 | ↑ | Revenue.                                              |
|                                                                                      | Total tax paid per year.                                                                  | ↑ | Revenue.                                              |
|                                                                                      | Operating costs.                                                                          | ↓ | Production cost. Total cost.                          |
|                                                                                      | Employee wages and benefits.                                                              | ↑ | Salary/Benefits.                                      |
|                                                                                      | Payments to providers of capital.                                                         | ↑ |                                                       |
|                                                                                      | Payments to government.                                                                   | ↑ |                                                       |
|                                                                                      | Community investments.                                                                    | ↑ | Investment potential.                                 |
| 2.70. Increase economic productivity (Target 8.2)                                    | Proportion of employees agreed that their productivity has increased.                     | ↑ | Perf_Productivity.                                    |
|                                                                                      | Ratio of monthly product value shipped to monthly labor expenditures.                     | ↑ | Cost of labour.                                       |
|                                                                                      | Adoption of information technology.                                                       | ↑ |                                                       |
|                                                                                      | Technological productivity.                                                               | ↑ |                                                       |
| 2.71. Ensure technological upgrading and innovation (Target 8.2)                     | Total number of implemented technological upgrades and innovative practices.              | ↑ | New thinking, new research. Improvements implemented. |
| 2.72. Increase decent job creation (Target 8.3)                                      | Work conditions.                                                                          | ↑ | Work environment. Employees satisfaction.             |
|                                                                                      | Proportion of orders (in NOK) from local suppliers.                                       | ↑ |                                                       |
|                                                                                      | Total number and rates of new employee hires.                                             | ↑ | Availability of human resources.                      |
| 2.73. Ensure creativity and innovation (Target 8.3)                                  | Total number of implemented innovative practices.                                         | ↑ | New thinking, new research. Improvements implemented. |
|                                                                                      | Return on implementation of innovative practice.                                          | ↑ |                                                       |
|                                                                                      | Proportion of employees by level of education.                                            | - | Competence.                                           |
|                                                                                      | Employees' perception of creativity of the company.                                       | ↑ |                                                       |
| 2.74. Improve resource efficiency in consumption and production (Target 8.4)         | Energy efficiency (consumption per unit produced).                                        | ↑ | Produced products.                                    |
|                                                                                      | Water efficiency (consumption per unit produced).                                         | ↑ | Produced products.                                    |
|                                                                                      | Material efficiency (consumption per unit produced).                                      | ↑ | Produced products.                                    |
|                                                                                      | Percentage of recycled input materials.                                                   | ↑ |                                                       |
|                                                                                      | Percentage of reclaimed products and their packaging materials for each product category. | ↑ |                                                       |
|                                                                                      | Duration of product life.                                                                 | ↑ |                                                       |
| 2.75. Provide decent work for people, including those with disabilities (Target 8.5) | Total number of employees with disabilities.                                              | - |                                                       |
|                                                                                      | Total number and rates of new employee hires.                                             | ↑ |                                                       |
|                                                                                      | Employee turnover by age group and gender.                                                | ↓ | Turnover.                                             |
|                                                                                      | Benefits and social protection.                                                           | ↑ | Salary/Benefits.                                      |
|                                                                                      | Total number of employees that were entitled to parental leave, by gender.                | - |                                                       |
|                                                                                      | Total number of employees that took parental leave, by gender.                            | - |                                                       |
|                                                                                      | Return to work and retention rates after parental leave, by gender.                       | ↑ |                                                       |
|                                                                                      | Training and education.                                                                   | ↑ | Competence.                                           |
|                                                                                      | Total number of incidents of discrimination and harassment.                               | 0 | Work environment.                                     |
| 2.76. Provide employment to young people (Target 8.5)                                | Ratio of employees with flexible working hours to fixed hours.                            | ↑ |                                                       |
| 2.77. Minimize forced labor (Target 8.7)                                             | Total number of employees in category under 30 years old.                                 | ↑ |                                                       |
|                                                                                      | Perception of company's performance on human rights by its employees.                     | ↑ |                                                       |



|                                                                                         |                                                                                                                                                                                |     |                                                           |
|-----------------------------------------------------------------------------------------|--------------------------------------------------------------------------------------------------------------------------------------------------------------------------------|-----|-----------------------------------------------------------|
|                                                                                         | Percentage of new suppliers that were screened using human rights criteria.                                                                                                    | ↑   | Coordination efforts with suppliers.                      |
| 2.78. Minimize child labor (Target 8.7)                                                 | Operations and suppliers identified as having significant risk for incidents of child labor.                                                                                   | 0   |                                                           |
| 2.79. Improve safe and secure working environment (Target 8.8)                          | Incidents related to occupational health and safety.                                                                                                                           | 0   | Incidents.                                                |
|                                                                                         | Type of injury and rates of injury, occupational diseases, lost days, and absenteeism, and total number of work-related fatalities, by gender.                                 | ↓   | Injuries.                                                 |
|                                                                                         | Workers with high incidence or high risk of diseases related to their occupation.                                                                                              | ↓   | Production safety.                                        |
|                                                                                         | Total operations and suppliers in which employee rights to exercise freedom of association or collective bargaining may be violated or at significant risk.                    | ↓   |                                                           |
|                                                                                         | Total number of incidents of discrimination and harassment.                                                                                                                    | 0   | Work environment.                                         |
| 2.84. Improve infrastructure (Target 9.1)                                               | Infrastructure investments.                                                                                                                                                    | ↑   | Investments potential.                                    |
| 2.85. Increase industry's share of employment and gross domestic product (Target 9.2)   | Total tax paid per year.                                                                                                                                                       | ↑   | Revenue.                                                  |
|                                                                                         | Total number and rates of new employee hires.                                                                                                                                  | ↑   | Availability of human resources. Cost of labor. Turnover. |
|                                                                                         | Net employment creation expressed as percentage contribution to employment in a region.                                                                                        | ↑   |                                                           |
| 2.86. Increase the access of small-scale enterprises to financial services (Target 9.3) | Percentage of orders (and invoices) from local SMEs suppliers compared to total orders.                                                                                        | ↑   |                                                           |
| 2.87. Upgrade infrastructure and retrofit industries (Target 9.4)                       | Total number of implemented technological upgrading projects.                                                                                                                  | ↑   | New thinking, new research. Improvements implemented.     |
| 2.88. Increase scientific research (Target 9.5)                                         | Time used for R&D activities as a percentage of total worktime.                                                                                                                | ↑   |                                                           |
|                                                                                         | ROI in R&D activities.                                                                                                                                                         | ↑   |                                                           |
|                                                                                         | Total number of cooperation projects with research institutions.                                                                                                               | ↑   |                                                           |
| 2.93. Increase income of the bottom 40% of population (Target 10.1)                     | Minimal wage for workers per year.                                                                                                                                             | ↑   | Salary/Benefits.                                          |
| 2.94. Reduce proportion of people below 50% of median income (Target 10.2)              | Minimal wage for workers per year.                                                                                                                                             | ↑   | Salary/Benefits.                                          |
| 2.95. Reduce inequalities and discrimination (Target 10.3)                              | Total number of incidents of discrimination and harassment.                                                                                                                    | 0   | Work environment.                                         |
|                                                                                         | Training and education.                                                                                                                                                        | ↑   | Competence. Effective solutions.                          |
|                                                                                         | Benefits provided to full-time employees compared to temporary/part-time employees.                                                                                            | ↓   | Salary/Benefits.                                          |
| 2.96. Adopt policies to decrease inequality (Target 10.4)                               | Total tax paid per year.                                                                                                                                                       | ↑   | Revenue.                                                  |
|                                                                                         | Percentage of employees within the company in each category, gender, age (under 30 years old, 30-50 years old, over 50 years old), minority groups.                            | -   |                                                           |
|                                                                                         | Average wage for employees within the company in each category, gender, age (under 30 years old, 30-50 years old, over 50 years old), minority groups.                         | -   | Salary/Benefits.                                          |
| 2.105. Increase access to safe, adequate and affordable housing (Target 11.1)           | Total investments in infrastructure.                                                                                                                                           | ↑   | Investment potential.                                     |
| 2.106. Increase access to safe, adequate and affordable transport (Target 11.2)         | Total investments in infrastructure.                                                                                                                                           | ↑   | Investment potential.                                     |
| 2.111. Reduce number of deaths and affected by disasters (Target 11.5)                  | Disaster risk management.                                                                                                                                                      | Y/N |                                                           |
| 2.120. Reduce the use of natural resources (Target 12.2)                                | Total weight/volume of renewable materials used in production per type of material (raw materials, associated process materials, semi-manufacture parts, packaging materials). | ↑   |                                                           |

|                                                                                                                |                                                                                                                                                                                    |     |                                                     |
|----------------------------------------------------------------------------------------------------------------|------------------------------------------------------------------------------------------------------------------------------------------------------------------------------------|-----|-----------------------------------------------------|
|                                                                                                                | Total weight/volume of non-renewable materials used in production per type of material (raw materials, associated process materials, semi-manufacture parts, packaging materials). | ↓   |                                                     |
|                                                                                                                | Energy efficiency (consumption per unit produced).                                                                                                                                 | ↑   | Produced products.                                  |
|                                                                                                                | Water efficiency (consumption per unit produced).                                                                                                                                  | ↑   | Produced products.                                  |
|                                                                                                                | Percentage of reclaimed products and their packaging materials for each product category.                                                                                          | ↑   |                                                     |
| 2.122. Reduce releases to air/water/soil of chemicals and all wastes throughout their life cycle (Target 12.4) | Total air emission (GHGs, ODS, NOx, SOx, POP, VOC, HAP, PM) during the LC.                                                                                                         | ↓   | Emission.                                           |
|                                                                                                                | Total weight of waste by type and disposal method during the LC.                                                                                                                   | ↓   |                                                     |
|                                                                                                                | Total water discharge by quality and destination during the LC.                                                                                                                    | ↓   |                                                     |
| 2.123. Reduce waste generation (Target 12.5)                                                                   | Total weight of waste by type and disposal method.                                                                                                                                 | ↓   |                                                     |
|                                                                                                                | Percentage of reclaimed products and their packaging materials for each product category.                                                                                          | ↑   |                                                     |
| 2.124. Publication of sustainability reports (Target 12.6)                                                     | Comprehensiveness of sustainability report.                                                                                                                                        | ↑   |                                                     |
|                                                                                                                | Percentage of operations with implemented social impact assessments.                                                                                                               | ↑   |                                                     |
|                                                                                                                | Percentage of operations with implemented environmental impact assessments.                                                                                                        | ↑   |                                                     |
| 2.125. Increase the use of sustainable public procurement practices (Target 12.7)                              | Eco-labels/Sustainable certifications for products.                                                                                                                                | ↑   |                                                     |
|                                                                                                                | Proportion of suppliers ISO 14001 certified.                                                                                                                                       | ↑   | Time used for cooperation with suppliers.           |
|                                                                                                                | Percentage of new suppliers that were screened using labor practices criteria.                                                                                                     | ↑   | Time used for cooperation with suppliers.           |
|                                                                                                                | Percentage of new suppliers that were screened using environmental criteria.                                                                                                       | ↑   | Time used for cooperation with suppliers.           |
|                                                                                                                | Percentage of new suppliers that were screened using human rights criteria.                                                                                                        | ↑   | Time used for cooperation with suppliers.           |
|                                                                                                                | Percentage of new suppliers that were screened using criteria for impacts on society.                                                                                              | ↑   | Time used for cooperation with suppliers.           |
| 2.126. Promote education about sustainable development (Target 12.8)                                           | Accessibility of product information to customers.                                                                                                                                 | ↑   | Customer satisfaction.                              |
|                                                                                                                | Educational initiatives on sustainable development for customers and suppliers.                                                                                                    | ↑   |                                                     |
| 2.129. Reduce the use of fossil-fuel (Target 12.c)                                                             | Total fossil-fuel energy consumption within the company.                                                                                                                           | ↓   |                                                     |
|                                                                                                                | Total fossil-fuel energy consumption of suppliers'.                                                                                                                                | ↓   |                                                     |
|                                                                                                                | Total fossil-fuel energy consumption of logistics.                                                                                                                                 | ↓   | Utilization of transport capacity. Extra transport. |
| 2.130. Increase resilience and adaptive capacity to natural disasters (Target 13.1)                            | Risk management related to climate change.                                                                                                                                         | Y/N |                                                     |
|                                                                                                                | Environmental protection expenditure.                                                                                                                                              | ↑   | Investment potential.                               |
| 2.132. Improve education on climate change mitigation/adaptation (Target 13.3)                                 | Training and education in climate change projects for stakeholders.                                                                                                                | ↑   |                                                     |
| 2.133. Increase number of CC mitigation actions (Target 13.3)                                                  | Total environmental expenditures.                                                                                                                                                  | ↑   | Investment potential. Improvements implemented.     |
|                                                                                                                | Total investment for pollution prevention and control (air, water, and solid waste).                                                                                               | ↑   | Investment potential. Improvements implemented.     |
| 2.135. Reduce marine pollution (Target 14.1)                                                                   | Total water discharge by quality and destination.                                                                                                                                  | ↓   |                                                     |
|                                                                                                                | Total number and volume of significant spills.                                                                                                                                     | ↓   |                                                     |
| 2.160. Reduce violence and deaths rates related to violence (Target 16.1)                                      | Registered cases of workplace violence and harassment.                                                                                                                             | ↓   | Work environment.                                   |

|                                                                                                                   |                                                                                                                                                                  |     |                                                        |
|-------------------------------------------------------------------------------------------------------------------|------------------------------------------------------------------------------------------------------------------------------------------------------------------|-----|--------------------------------------------------------|
| 2.161. Reduce abuse, exploitation, trafficking and violence against children (Target 16.2)                        | Operations and suppliers identified as having significant risk for incidents of child labor.                                                                     | 0   |                                                        |
| 2.162. Promote the rule of law at national and international levels (Target 16.3)                                 | Total monetary value of significant fines for non-compliance with laws and regulations.                                                                          | ↓   | Total cost.                                            |
|                                                                                                                   | Total number of non-monetary sanctions for non-compliance with laws and regulations.                                                                             | ↓   |                                                        |
| 2.164. Reduce corruption and bribery (Target 16.5)                                                                | Total number and percentage of operations assessed for risks related to corruption and the significant risks identified.                                         | ↓   |                                                        |
|                                                                                                                   | Total number and percentage of employees that the company's anti-corruption policies and procedures have been communicated to, broken down by employee category. | ↑   |                                                        |
|                                                                                                                   | Total number of confirmed incidents of corruption.                                                                                                               | ↓   |                                                        |
|                                                                                                                   |                                                                                                                                                                  |     |                                                        |
| 2.166. Improve decision-making at all levels (responsive, inclusive, participatory, representative) (Target 16.7) | Stakeholder engagement plans based on stakeholder mapping.                                                                                                       | ↑   |                                                        |
|                                                                                                                   | Local community consultation committees and processes that include vulnerable groups.                                                                            | ↑   |                                                        |
|                                                                                                                   | Works councils, occupational health and safety committees, and other employee representation bodies to deal with impacts.                                        | ↑   |                                                        |
|                                                                                                                   | Percentage of total workforce represented in formal joint management.                                                                                            | ↑   | Employees empowerment.                                 |
| 2.169. Improve public access to information (Target 16.10)                                                        | Publicly available missions and values statement.                                                                                                                | Y/N |                                                        |
|                                                                                                                   | Publicly available strategy and performance results.                                                                                                             | Y/N | Clarity of objectives, expectations, responsibilities. |
| 2.170. Protect fundamental freedoms (Target 16.10)                                                                | Total number of substantiated complaints regarding breaches of employees' and customers' privacy and losses of data.                                             | ↓   | Customers complaints.                                  |
| 2.172. Reduce discrimination and harassment (Target 16.b)                                                         | Total number of incidents of discrimination and harassment.                                                                                                      | 0   | Employees satisfaction. Work environment.              |
| 2.188. Improve public, public-private and civil society partnership (Target 17.17)                                | The extent to which the government is present in the shareholding structure.                                                                                     | -   |                                                        |
| 2.190. Improve measurement of progress on sustainable development (Target 17.19)                                  | Comprehensiveness of sustainability reports (issues covered).                                                                                                    | ↑   |                                                        |

| Sustainability criteria for manufacturing                                                   | Indicators                                                                                    | Desired direction | Element of organizational model                          |
|---------------------------------------------------------------------------------------------|-----------------------------------------------------------------------------------------------|-------------------|----------------------------------------------------------|
| 1.1. Reduce cost of product during the whole LC of the product                              | Total product cost.                                                                           | ↓                 | Total cost.                                              |
| 1.2. Reduce noise from all processes                                                        | Noise level in the factory.                                                                   | ↓                 |                                                          |
| 1.3. Improve safety of technologies                                                         | Total number of safety incidents.                                                             | 0                 | Incidents.                                               |
| 1.4. Reduce pollution to air during the whole LC of the product                             | Total air emissions (GHGs, ODS, NOx, SOx, POP, VOC, HAP, PM) during material extrusion.       | ↓                 |                                                          |
|                                                                                             | Total air emissions (GHGs, ODS, NOx, SOx, POP, VOC, HAP, PM) at the suppliers.                | ↓                 |                                                          |
|                                                                                             | Total air emissions (GHGs, ODS, NOx, SOx, POP, VOC, HAP, PM) during the production.           | ↓                 | Emission.                                                |
|                                                                                             | Total air emissions (GHGs, ODS, NOx, SOx, POP, VOC, HAP, PM) during the distribution.         | ↓                 | Utilization of transport capacity. Extra transport.      |
|                                                                                             | Total air emissions (GHGs, ODS, NOx, SOx, POP, VOC, HAP, PM) during the use.                  | ↓                 |                                                          |
| 1.5. Improve customers satisfaction                                                         | Customer satisfaction.                                                                        | ↑                 | Customer satisfaction.                                   |
| 1.6. Minimize the use of non-renewable natural resources during the whole LC of the product | Ratio of non-renewable natural resources compared to renewable during the production.         | ↓                 |                                                          |
|                                                                                             | Ratio of non-renewable natural resources compared to renewable during the material extrusion. | ↓                 |                                                          |
|                                                                                             | Ratio of non-renewable natural resources compared to renewable during the transportation.     | ↓                 |                                                          |
|                                                                                             | Ratio of non-renewable natural resources compared to renewable at the suppliers.              | ↓                 |                                                          |
| 1.7. Increase value creation for society                                                    | End users' quality of life.                                                                   | ↑                 |                                                          |
| 1.8. Minimize the use of non-renewable energy during the LC of the product                  | Ratio of non-renewable energy compared to renewable during the production.                    | ↓                 |                                                          |
|                                                                                             | Ratio of non-renewable energy compared to renewable during the material extrusion.            | ↓                 |                                                          |
|                                                                                             | Ratio of non-renewable energy compared to renewable during the transportation.                | ↓                 |                                                          |
|                                                                                             | Ratio of non-renewable energy compared to renewable at the suppliers.                         | ↓                 |                                                          |
| 1.9. Minimize the use of land during the product LC                                         | Use of land for extrusion & production.                                                       | ↓                 |                                                          |
| 1.10. Maximize new opportunities for organization                                           | Number of projects with research institutes.                                                  | ↑                 |                                                          |
|                                                                                             | Investments in R&D, NOK & % from total investments.                                           | ↑                 | Investment potential. Investments in improvements.       |
| 1.11. Reduce generation of waste during the whole LC of the product                         | Total weight of waste by type and disposal method during the LC.                              | ↓                 |                                                          |
|                                                                                             | Total scrap produced.                                                                         | ↓                 | Products out of specification.                           |
| 1.12. Ensure competitiveness of the product                                                 | Cost of product compared to similar products.                                                 | ↓                 |                                                          |
|                                                                                             | Quality of product compared to competitors.                                                   | ↑                 | Product quality.                                         |
| 1.13. Ensure competitiveness of the organization                                            | Organizational income.                                                                        | ↑                 | Income.                                                  |
|                                                                                             | Organizational image.                                                                         | ↑                 |                                                          |
|                                                                                             | Technological advancement.                                                                    | ↑                 |                                                          |
| 1.14. Improve employees' rights and development                                             | Employees' rights to privacy, fair compensation, and freedom from discrimination.             | ↑                 |                                                          |
|                                                                                             | Employees training and education.                                                             | ↑                 | Competence. Effective solution. Improvements identified. |
|                                                                                             | Number of courses/conferences/workshops attended.                                             | ↑                 |                                                          |
|                                                                                             | Investment in employee training and education as percentage of net sales.                     | ↑                 | Investment potential.                                    |

|                                                                                                                 |                                                                                                                                                              |   |                                                  |
|-----------------------------------------------------------------------------------------------------------------|--------------------------------------------------------------------------------------------------------------------------------------------------------------|---|--------------------------------------------------|
| 1.15. Improve operational effectiveness                                                                         | Relationship between the planned production cycle to complete a batch and the actual production cycle time.                                                  | ↑ | Manufacturing schedule adherence.                |
|                                                                                                                 | Total defects (requires rework, repair, reprocessing).                                                                                                       | ↓ | Products out of specification.                   |
|                                                                                                                 | OEE.                                                                                                                                                         | ↑ | OEE.                                             |
|                                                                                                                 | Yield loss.                                                                                                                                                  | ↓ | Quality yield.                                   |
| 1.16. Improve operational efficiency                                                                            | Output ratio in time unit (actual versus planned output).                                                                                                    | ↑ | OEE.                                             |
|                                                                                                                 | Ratio of the value added production time to total production time.                                                                                           | ↑ |                                                  |
|                                                                                                                 | Changeover time.                                                                                                                                             | ↓ | Changeover time.                                 |
| 1.17. Ensure social equity                                                                                      | Difference between access to benefits among categories of employees.                                                                                         | ↓ | Salary/Benefits.                                 |
| 1.18. Increase functionality of the product                                                                     | Product's functionality perceived by customer.                                                                                                               | ↑ | Satisfy customers' requirements.                 |
| 1.19. Protect personal health during the whole LC of the product/service                                        | Health impact of the product in use.                                                                                                                         | ↓ |                                                  |
|                                                                                                                 | Type of injury and rates of injury, occupational diseases, lost days, and absenteeism, and total number of work-related fatalities, by region and by gender. | ↓ | Injuries.                                        |
|                                                                                                                 | Workers with high incidence or high risk of diseases related to their occupation.                                                                            | ↓ | Production safety.                               |
| 1.20. Increase innovation (through innovative techniques/ methods/ technologies/ practices/ products/ services) | Total number of implemented innovative practices.                                                                                                            | ↑ | New thinking, new research. Effective solutions. |
|                                                                                                                 | Return on implementation of innovative practice.                                                                                                             | ↑ |                                                  |
|                                                                                                                 | Proportion of employees by level of education.                                                                                                               | - | Competence. Creativity of R&D team.              |
| 1.21. Improve information security and cybersecurity                                                            | Information security incidents.                                                                                                                              | ↓ |                                                  |
| 1.22. Enhance learning of employees                                                                             | Investment in employee training and education as percentage of net sales.                                                                                    | ↑ | Investment potential.                            |
|                                                                                                                 | Number of courses/conferences/workshops attended.                                                                                                            | ↑ |                                                  |
| 1.23. Improve conditions of work and social protection for employees                                            | Conditions of work evaluated by employees.                                                                                                                   | ↑ | Work environment.                                |
|                                                                                                                 | Paid days off.                                                                                                                                               | ↑ | Salary/Benefits.                                 |
| 1.24. Increase organizational productivity                                                                      | Ratio of produced to ordered products.                                                                                                                       | ↑ | Produced products.                               |
|                                                                                                                 | Ratio of sales per employee.                                                                                                                                 | ↑ |                                                  |
|                                                                                                                 | Ratio of produced products to labour-hours.                                                                                                                  | ↑ | Produced products.                               |
| 1.25. Increase organizational profitability                                                                     | Profit.                                                                                                                                                      | ↑ | Revenue.                                         |
|                                                                                                                 | Manufacturing cost as a percentage of revenue.                                                                                                               | ↓ | Total cost. Production cost. Revenue.            |
|                                                                                                                 | Liquidity.                                                                                                                                                   | ↑ |                                                  |
| 1.26. Improve quality of the product                                                                            | Total number of rejected/returned products by customer.                                                                                                      | ↓ | Customers complaints.                            |
|                                                                                                                 | Product durability.                                                                                                                                          | ↑ | Product quality.                                 |
| 1.27. Improve quality of the process                                                                            | Yield for process.                                                                                                                                           | ↑ | Quality yield.                                   |
| 1.28. Improve quality of systems                                                                                | Yield for production system.                                                                                                                                 | ↑ |                                                  |
| 1.29. Improve reliability of the product                                                                        | Failure rate of product in use.                                                                                                                              | ↓ |                                                  |
| 1.30. Improve reliability of processes                                                                          | Mean Time Between Failure in a process.                                                                                                                      | ↑ | Equipment failure.                               |
|                                                                                                                 | Failure Rate of process.                                                                                                                                     | ↓ | Equipment failure.                               |

|                                                                              |                                                                                                                                                                                               |   |                                                             |
|------------------------------------------------------------------------------|-----------------------------------------------------------------------------------------------------------------------------------------------------------------------------------------------|---|-------------------------------------------------------------|
|                                                                              | Ratio of corrective maintenance time in relation to the total maintenance (planned and corrective).                                                                                           | ↓ | Time used for reactive maintenance. Preventive maintenance. |
| 1.31. Improve reliability of technologies                                    | Mean Time Between Failure for equipment.                                                                                                                                                      | ↑ | Equipment failure.                                          |
|                                                                              | Failure Rate of equipment.                                                                                                                                                                    | ↓ |                                                             |
| 1.32. Improve reliability of systems                                         | Mean Time Between Failure for production system.                                                                                                                                              | ↑ |                                                             |
|                                                                              | Failure Rate of production system.                                                                                                                                                            | ↓ |                                                             |
|                                                                              | Number of emergency events or unplanned shutdowns                                                                                                                                             | ↓ | Unplanned stops.                                            |
| 1.33. Improve safety of the product                                          | Total number of incidents of non-compliance with regulations and voluntary codes concerning the health and safety impacts of products.                                                        | ↓ |                                                             |
| 1.34. Improve safety of processes                                            | Hours of safety training per employee.                                                                                                                                                        | ↑ |                                                             |
|                                                                              | Safety incidents for process.                                                                                                                                                                 | 0 | Incidents.                                                  |
| 1.35. Ensure fairness on employee wages and benefits                         | Minimal wage for workers per year.                                                                                                                                                            | ↑ | Salary/Benefits.                                            |
|                                                                              | Ratio of local minimum wage to the company's entry level wage by gender.                                                                                                                      | ↑ | Salary/Benefits.                                            |
| 1.36. Reduce employee turnover                                               | Employees turnover per year.                                                                                                                                                                  | ↓ | Turnover.                                                   |
| 1.37. Protect biodiversity                                                   | Investments in biodiversity.                                                                                                                                                                  | ↑ | Investment potential.                                       |
| 1.38. No bribery and corruption                                              | Total number and percentage of employees that the company's anti-corruption policies and procedures have been communicated to, broken down by employee category.                              | ↑ |                                                             |
|                                                                              | Total number of confirmed incidents of corruption.                                                                                                                                            | ↓ |                                                             |
| 1.39. Improve professional knowledge and competence of employees             | Percentage of employees who agree that their knowledge and competence has been increased.                                                                                                     | ↑ | Competence.                                                 |
| 1.40. Improve safety of systems                                              | Safety incidents in production systems.                                                                                                                                                       | 0 | Incidents.                                                  |
| 1.41. Ensure compatible salary                                               | Rate of salary compared to average in industry.                                                                                                                                               | ↑ | Salary/Benefits.                                            |
| 1.42. Reduce pollution to soil during the whole LC of the product            | Pollution to soil in production.                                                                                                                                                              | ↓ |                                                             |
|                                                                              | Pollution to soil in suppliers' production.                                                                                                                                                   | ↓ |                                                             |
|                                                                              | Pollution to soil during transportation.                                                                                                                                                      | ↓ |                                                             |
|                                                                              | Pollution to soil during the use.                                                                                                                                                             | ↓ |                                                             |
| 1.43. Improve employees satisfaction                                         | Percentage of employees satisfied with their work.                                                                                                                                            | ↑ | Employees satisfaction.                                     |
|                                                                              | Percentage of employees feel motivated at work.                                                                                                                                               | ↑ | Motivation. Employees engagement.                           |
|                                                                              | Total grievances registered and resolved.                                                                                                                                                     | ↓ |                                                             |
| 1.44. Minimize the use of toxic materials during the whole LC of the product | Toxic materials in production.                                                                                                                                                                | ↓ |                                                             |
|                                                                              | Toxic materials in product.                                                                                                                                                                   | ↓ |                                                             |
| 1.45. Increase employee involvement and empowerment                          | Percentage of employees who agree that company involve and encourage employees.                                                                                                               | ↑ | Employees empowerment. Employees engagement.                |
|                                                                              | Percentage of employees that are shareholders in the company.                                                                                                                                 | ↑ |                                                             |
|                                                                              | Number of suggested improvements by employee.                                                                                                                                                 | ↑ | Employees engagement.                                       |
| 1.46. Provide democratic processes and accountable governance structures     | Percentage of total employees covered by collective bargaining agreements.                                                                                                                    | ↑ |                                                             |
|                                                                              | Composition of the governance body and its committees by: executive or non-executive, gender, competences relating to economic, environmental and social impacts, stakeholder representation. | - |                                                             |
|                                                                              | Company's openness to stakeholder review and participation in decision-making process.                                                                                                        | ↑ |                                                             |

|                                                                       |                                                                                                                                                              |   |                                            |
|-----------------------------------------------------------------------|--------------------------------------------------------------------------------------------------------------------------------------------------------------|---|--------------------------------------------|
| 1.47. Minimize the use of water during the whole LC of the product    | Total water withdrawal in production.                                                                                                                        | ↓ |                                            |
|                                                                       | Total water withdrawal by suppliers.                                                                                                                         | ↓ |                                            |
|                                                                       | Total water withdrawal in use.                                                                                                                               | ↓ |                                            |
| 1.48. Increasing the wealth of the society                            | Total number and rates of new employee hires.                                                                                                                | ↑ | Availability of human resources. Turnover. |
|                                                                       | Societal investment.                                                                                                                                         | ↑ | Investment potential.                      |
| 1.49. Improve the quality of life (employees, customers, and society) | Quality of life evaluated by employees.                                                                                                                      | ↑ | Employees satisfaction.                    |
| 1.50. Decrease in the frequency of environmental accidents            | Environmental accidents in production.                                                                                                                       | 0 |                                            |
| 1.51. Provide equitable opportunities for all employees               | Percentage of employees feeling equitable opportunities for development.                                                                                     | ↑ | Employees engagement.                      |
| 1.52. Ensure organizational survival                                  | Market share.                                                                                                                                                | ↑ | Competitive advantage.                     |
|                                                                       | Organizational income.                                                                                                                                       | ↑ | Income.                                    |
|                                                                       | Return on average capital employed (ROACE).                                                                                                                  | ↑ |                                            |
| 1.53. Encourage workplace diversity                                   | Percentage of employees within the company in each category, gender, age (under 30 years old, 30-50 years old, over 50 years old), minority groups.          | - |                                            |
| 1.54. Ensure acceptable working hours                                 | Hours of overwork per employee.                                                                                                                              | ↓ | Excessive work overload per employee.      |
|                                                                       | Percentage of working hours outside of normal working hours.                                                                                                 | ↓ |                                            |
| 1.55. Improve company reputation                                      | Reputation of the company.                                                                                                                                   | ↑ |                                            |
|                                                                       | Number of complaints received from the community.                                                                                                            | ↓ |                                            |
|                                                                       | Total number of sanctions for noncompliance with laws and regulations.                                                                                       | ↓ |                                            |
| 1.56. Maximize effectiveness of product over the whole LC             | Duration of product life.                                                                                                                                    | ↑ |                                            |
| 1.57. Reduce pollution to water during the whole LC of the product    | Quality of discharged water from production.                                                                                                                 | ↑ |                                            |
|                                                                       | Quality of discharged water at suppliers' sites.                                                                                                             | ↑ |                                            |
|                                                                       | Total amount of pollutants to water during transportation.                                                                                                   | ↓ |                                            |
|                                                                       | Total amount of pollutants to water during the use.                                                                                                          | ↓ |                                            |
| 1.58. Ensure conformance to laws and regulations                      | Cases of law and regulations violation.                                                                                                                      | ↓ |                                            |
| 1.59. Ensure fair competition                                         | Total number of legal actions for anti-competitive behavior, anti-trust, and monopoly practices.                                                             | ↓ |                                            |
| 1.60. Increase productivity of employees                              | Percentage of employees agreed that their productivity has increased.                                                                                        | ↑ | Perf_Productivity.                         |
|                                                                       | Ratio of monthly product value shipped to monthly labor expenditures,                                                                                        | ↑ | Cost of labour.                            |
| 1.61. Improve occupational health and safety                          | Type of injury and rates of injury, occupational diseases, lost days, and absenteeism, and total number of work-related fatalities, by region and by gender. | ↓ | Injuries.                                  |
| 1.62. Ensure freedom of association and collective bargaining         | Percentage of employees feeling the freedom of associations.                                                                                                 | ↑ |                                            |
|                                                                       | Number of employees in associations.                                                                                                                         | ↑ |                                            |
|                                                                       | Total operations and suppliers in which employee rights to exercise freedom of association or collective bargaining may be violated or at significant risk.  | ↓ |                                            |
| 1.63. Reduce discrimination                                           | Total number of incidents of discrimination and harassment.                                                                                                  | 0 | Work environment.                          |
| 1.64. Improve restoration of natural habitats                         | Investments in restoration of natural habitats.                                                                                                              | ↑ | Investment potential.                      |

|                                                   |                                                                                                                                              |   |                                           |
|---------------------------------------------------|----------------------------------------------------------------------------------------------------------------------------------------------|---|-------------------------------------------|
| 1.65. Increase employment creation                | Net employment creation expressed as percentage contribution to employment in a region.                                                      | ↑ |                                           |
|                                                   | Total number and rates of new employee hires.                                                                                                | ↑ |                                           |
|                                                   | Proportion of orders (in NOK) from local suppliers.                                                                                          | ↑ |                                           |
| 1.66. Improve well-being of local communities     | Investments into community projects (e.g., schools, hospitals, infrastructure) as percentage of revenues.                                    | ↑ | Investment potential.                     |
|                                                   | Local community development programs based on local communities' needs.                                                                      | ↑ |                                           |
|                                                   | Proportion of employees hired from the local community.                                                                                      | ↑ |                                           |
|                                                   | Proportion of orders (in NOK) from local suppliers.                                                                                          | ↑ |                                           |
| 1.67. Ensure human rights for employees           | Cases of violation of human rights.                                                                                                          | 0 |                                           |
|                                                   | Perception of company's performance on human rights by its employees.                                                                        | ↑ |                                           |
| 1.68. Improve work-life balance for employees     | Total hours of overwork.                                                                                                                     | ↓ | Excessive work overload per employee.     |
| 1.69. Respect indigenous rights                   | Total number of incidents of violations involving rights of indigenous peoples.                                                              | 0 |                                           |
| 1.70. Responsible political involvement           | Participation in public policy development.                                                                                                  | ↑ |                                           |
| 1.71. Increase social investment                  | Total social investment.                                                                                                                     | ↑ | Investment potential.                     |
| 1.72. Increase supplier support and collaboration | Improvements projects for suppliers.                                                                                                         | ↑ | Time used for cooperation with suppliers. |
|                                                   | Suppliers owned or staffed by members of vulnerable, marginalized or underrepresented social groups.                                         | ↑ |                                           |
| 1.73. Ensure customers' rights                    | Total number of substantiated complaints regarding breaches of customer privacy and losses of customer data                                  | ↓ | Customers complaints.                     |
| 1.74. Increase stakeholder engagement             | Percentage of stakeholders agreed that they are engaged in decision-making.                                                                  | ↑ |                                           |
|                                                   | Policy and procedures involving consultation and negotiation with employees over changes in the company (e.g., restructuring, redundancies). | ↑ | Employees empowerment.                    |
|                                                   | Summary of the policy on stakeholder involvement,                                                                                            | - |                                           |
| 1.75. Threat suppliers fairly                     | Ratio of supplier price to market price.                                                                                                     | ↑ |                                           |



## CSA tool for Company C

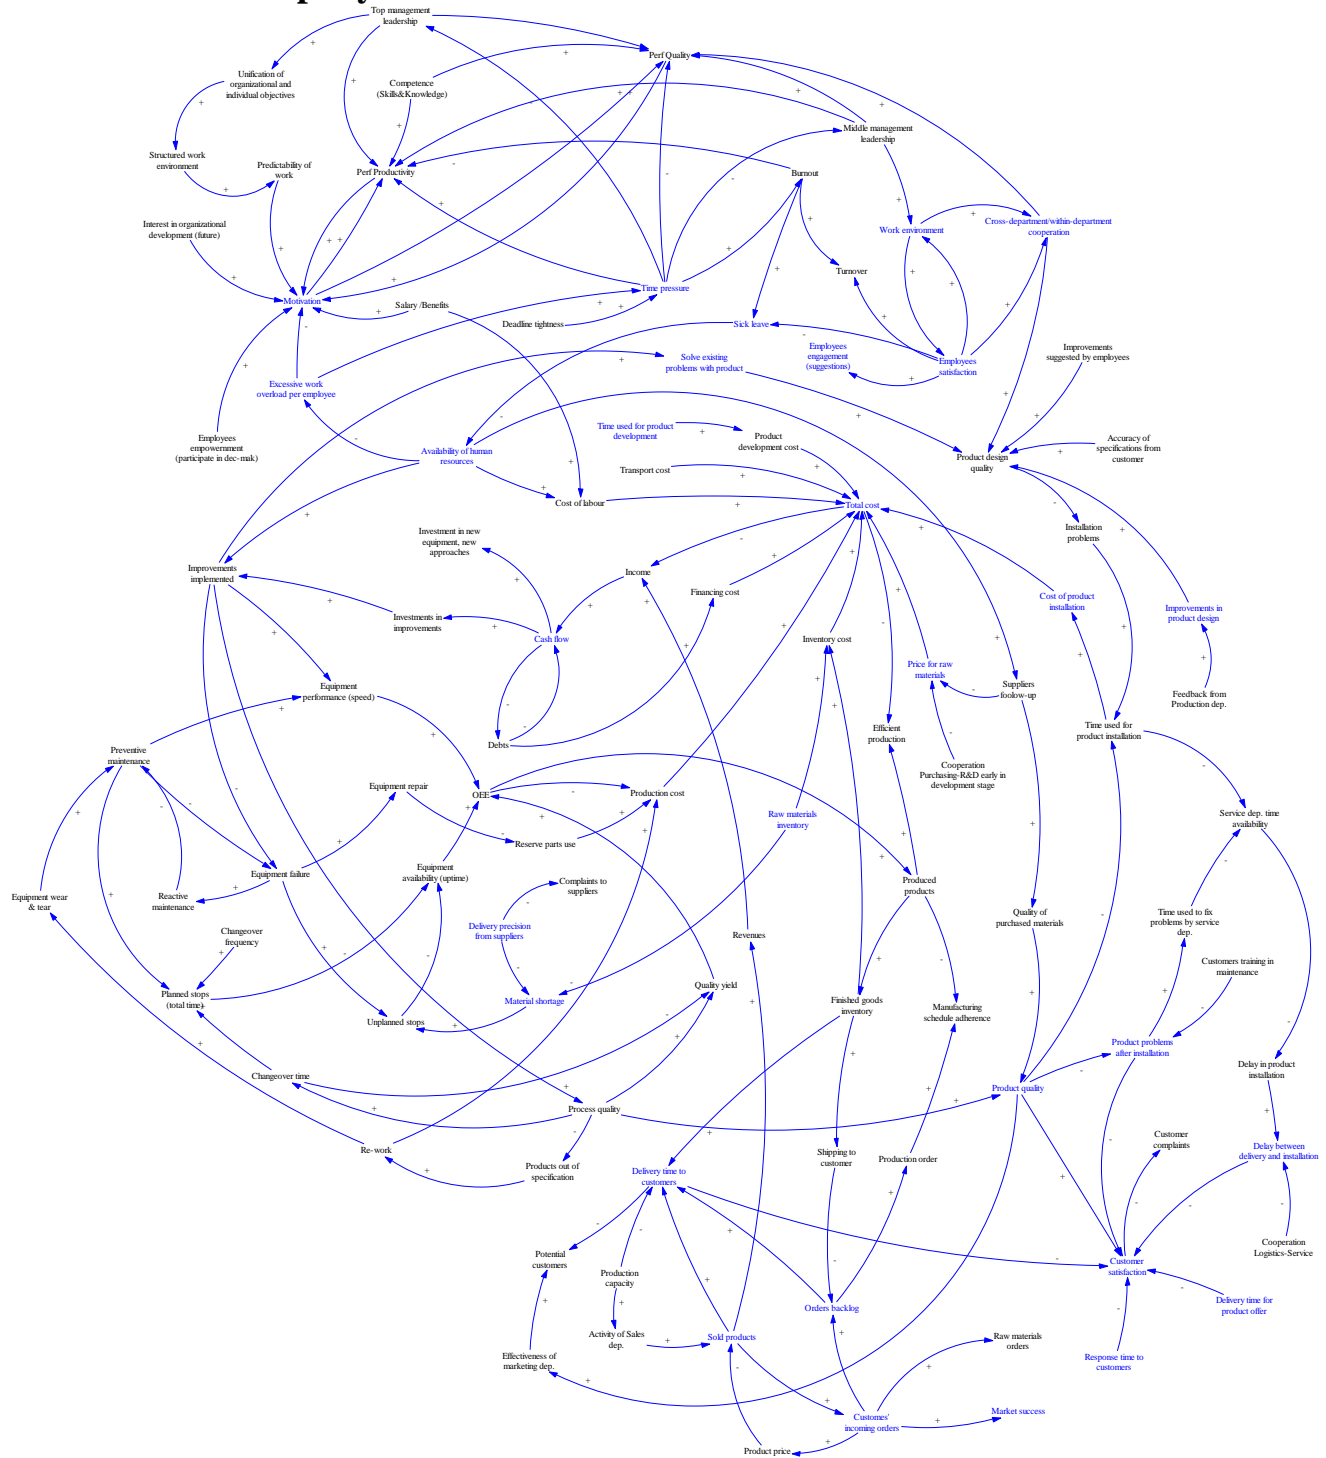

| Sustainability criteria for world                                                                            | Indicators                                                                                                                                                   | Desired direction | Element of organizational model       |
|--------------------------------------------------------------------------------------------------------------|--------------------------------------------------------------------------------------------------------------------------------------------------------------|-------------------|---------------------------------------|
| 2.1. Reduce extreme poverty (Target 1.1, 1.2)                                                                | Minimal wage for workers per year.                                                                                                                           | ↑                 | Cost of labour.                       |
|                                                                                                              | Total tax payed per year.                                                                                                                                    | ↑                 | Revenues.                             |
|                                                                                                              | Range of benefits for workers.                                                                                                                               | ↑                 | Salary/Benefits.                      |
|                                                                                                              | Ratio of supplier price to market price.                                                                                                                     | ↑                 | Price for raw materials.              |
| 2.2. Improve nationally social protection systems and measures (Target 1.3)                                  | Social security benefits for workers.                                                                                                                        | ↑                 | Salary/Benefits.                      |
|                                                                                                              | Number of employees with insurance, per type of insurance.                                                                                                   | ↑                 | Salary/Benefits.                      |
| 2.3. Ensure equal rights to basic services (e.g., new technology) (Target 1.4)                               | Number of new solutions/techniques/technologies implemented.                                                                                                 | ↑                 | Improvements implemented.             |
| 2.4. Reduce exposure and vulnerability to climate-related extreme events. (Target 1.5)                       | Risk management related to climate-related events.                                                                                                           | Y/N               |                                       |
|                                                                                                              | Investments in resilience to environmental hazards and resource scarcity, NOK & % of all investments.                                                        | ↑                 | Investments in improvements.          |
| 2.19. Reduce maternal mortality (Target 3.1)                                                                 | Maternity/paternity leave.                                                                                                                                   | ↑                 |                                       |
|                                                                                                              | Total number of incidents of discrimination against pregnancy.                                                                                               | ↓                 |                                       |
|                                                                                                              | Decent working conditions for female employees.                                                                                                              | ↑                 | Work environment.                     |
| 2.22. Reduce mortality from non-communicable diseases (Target 3.4)                                           | Type of injury and rates of injury, occupational diseases, lost days, and absenteeism, and total number of work related fatalities, by region and by gender. | ↓                 |                                       |
|                                                                                                              | Total hours of overwork.                                                                                                                                     | ↓                 |                                       |
|                                                                                                              | Hours of overwork per employee.                                                                                                                              | ↓                 | Excessive work overload per employee. |
|                                                                                                              | Type of benefits for parents.                                                                                                                                | -                 | Salary/Benefits.                      |
|                                                                                                              | Total air emission (GHGs, ODS, NOx, SOx, POP, VOC, HAP, PM).                                                                                                 | ↓                 |                                       |
|                                                                                                              | Total number and volume of significant spills.                                                                                                               | ↓                 |                                       |
|                                                                                                              | Total water discharge by quality and destination.                                                                                                            | ↓                 |                                       |
|                                                                                                              | Human health impact (e.g., ionizing radiation, human toxicity, respiratory inorganics).                                                                      | ↓                 |                                       |
|                                                                                                              | Legal complaints against vehicles owned by company.                                                                                                          | ↓                 |                                       |
| 2.24.Reduce number of deaths and injuries from road traffic accidents (Target 3.6)                           |                                                                                                                                                              |                   |                                       |
| 2.26. Increase health coverage (Target 3.8)                                                                  | Percentage of employees with life insurance, disability, and invalidity coverage.                                                                            | ↑                 |                                       |
| 2.27. Reduce deaths and illness from hazardous chemicals (Target 3.9)                                        | Total amount of hazardous chemicals used in production.                                                                                                      | ↓                 |                                       |
|                                                                                                              | Total amount of hazardous chemicals in product.                                                                                                              | ↓                 |                                       |
| 2.28. Reduce deaths and illness from air, water, and soil pollution and contamination (Target 3.9)           | Total air emission (GHGs, ODS, NOx, SOx, POP, VOC, HAP, PM).                                                                                                 | ↑                 |                                       |
|                                                                                                              | Water quality within the company.                                                                                                                            | ↑                 |                                       |
|                                                                                                              | Total water discharge by quality and destination.                                                                                                            | ↓                 |                                       |
|                                                                                                              | Total weight of waste by type and disposal method.                                                                                                           | ↓                 |                                       |
| 2.33. Ensure free, equitable and quality primary and secondary education for all girls and boys (Target 4.1) | Operations and suppliers identified as having significant risk for incidents of child labor.                                                                 | 0                 |                                       |
| 2.34. Ensure access to quality early childhood development, care and pre-primary education (Target 4.2)      | Type of support for parents.                                                                                                                                 | -                 | Salary/Benefits.                      |

|                                                                                                                              |                                                                                                                                                         |     |                                           |
|------------------------------------------------------------------------------------------------------------------------------|---------------------------------------------------------------------------------------------------------------------------------------------------------|-----|-------------------------------------------|
| 2.35. Ensure equal access to affordable and quality technical, vocational and tertiary education (Target 4.3)                | Average hours of training per year per employee by gender, and by employee category.                                                                    | ↑   | Competence.                               |
|                                                                                                                              | Programs for skills management and lifelong learning that support the continued employability of employees.                                             | ↑   |                                           |
| 2.36. Increase the number of youth and adults with relevant skills for development/decent jobs/entrepreneurship (Target 4.4) | Percentage of employees receiving regular performance and career development reviews, by gender and age.                                                | ↑   |                                           |
|                                                                                                                              | Programs for skills management and lifelong learning that support the continued employability of employees.                                             | ↑   |                                           |
| 2.37. Eliminate genders disparities in education (Target 4.5)                                                                | Training, internship programs, and further education without discrimination.                                                                            | ↑   |                                           |
| 2.38. Ensure access to education/training for vulnerable (Target 4.5)                                                        | Percentage of employees receiving regular performance and career development reviews, by gender and by employee category.                               | ↑   |                                           |
| 2.40. Improve knowledge and skills to promote SD (Target 4.7)                                                                | Percentage of employees trained in sustainability initiatives and sustainable development, including specific topics on women's rights, water use, etc. | ↑   |                                           |
| 2.44. Reduce discrimination against all women/girls (Target 5.1)                                                             | Percentage of employees in the company by gender.                                                                                                       | -   |                                           |
|                                                                                                                              | Percentage of women in senior executive and senior and middle management ranks.                                                                         | ↑   |                                           |
|                                                                                                                              | Total number of incidents of discrimination and harassment.                                                                                             | 0   | Work environment. Employees satisfaction. |
|                                                                                                                              | Total number of employees that took parental leave, by gender.                                                                                          | -   |                                           |
| 2.45. Eliminate violence against women (Target 5.2)                                                                          | Registered cases of workplace violence and harassment against women.                                                                                    | 0   | Work environment. Employees satisfaction. |
| 2.47. Recognize unpaid domestic work and care (Target 5.4.)                                                                  | Benefits provided to full-time employees compared to temporary or part-time employees.                                                                  | ↓   | Salary/Benefits.                          |
|                                                                                                                              | Flexible work option.                                                                                                                                   | ↑   | Salary/Benefits.                          |
|                                                                                                                              | Total number of employees that took parental leave, by gender.                                                                                          | -   |                                           |
| 2.48. Ensure equal opportunities for women for leadership (Target 5.5)                                                       | Percentage of women in senior executive and senior and middle management ranks.                                                                         | ↑   |                                           |
| 2.53. Promote gender equality (Target 5.c)                                                                                   | Percentage of employees within the company by gender.                                                                                                   | -   |                                           |
|                                                                                                                              | Percentage of women in senior executive and senior and middle management ranks.                                                                         | ↑   |                                           |
|                                                                                                                              | Ratio of basic salary and remuneration of women to men by employee category.                                                                            | -   | Salary/Benefits.                          |
| 2.54. Increase access to safe and affordable drinking water (Target 6.1)                                                     | Total water withdrawal.                                                                                                                                 | ↓   |                                           |
|                                                                                                                              | Total volume of water recycled and reused by the company.                                                                                               | ↑   |                                           |
|                                                                                                                              | Total water discharge by quality and destination.                                                                                                       | ↓   |                                           |
| 2.55. Increase sanitation and hygiene (Target 6.2)                                                                           | Waste management.                                                                                                                                       | ↑   |                                           |
|                                                                                                                              | Access to sanitation facility (% of employees with access to a sanitation facility).                                                                    | ↑   |                                           |
|                                                                                                                              | Sanitation and hygiene management.                                                                                                                      | Y/N |                                           |
|                                                                                                                              |                                                                                                                                                         |     |                                           |
| 2.56. Improve water quality (Target 6.3)                                                                                     | Total water discharge by quality and destination.                                                                                                       | ↓   |                                           |
| 2.57. Increase water-use efficiency (Target 6.4)                                                                             | Water efficiency (consumption per unit produced) within the company.                                                                                    | ↑   | Produced products.                        |
|                                                                                                                              | Water efficiency (consumption per unit produced) at the suppliers' sites.                                                                               | ↑   | Produced products.                        |
|                                                                                                                              | Total water discharge by quality and destination                                                                                                        | ↓   |                                           |
| 2.58. Reduce water scarcity (Target 6.4)                                                                                     | Total water withdrawal.                                                                                                                                 | ↓   |                                           |
|                                                                                                                              | Total volume of water recycled and reused by the company.                                                                                               | ↑   |                                           |
|                                                                                                                              | Total water discharge by quality and destination.                                                                                                       | ↓   |                                           |

|                                                                                      |                                                                                           |   |                                            |
|--------------------------------------------------------------------------------------|-------------------------------------------------------------------------------------------|---|--------------------------------------------|
| 2.60. Protect and restore water-related ecosystems (Target 6.6)                      | Investments in environmental protection.                                                  | ↑ | Investments in improvements.               |
| 2.64. Increase the use of renewable energy (Target 7.2)                              | Proportion of renewable energy used in the company.                                       | ↑ |                                            |
| 2.65. Improve energy efficiency (Target 7.3)                                         | Energy efficiency (consumption per unit produced).                                        | ↑ | Produced products.                         |
|                                                                                      | Energy intensity (consumption per monetary unit of sales).                                | ↓ | Produced products.                         |
| 2.69. Sustain economic growth (Target 8.1)                                           | Revenues.                                                                                 | ↑ | Revenues.                                  |
|                                                                                      | Total tax paid per year.                                                                  | ↑ | Revenues.                                  |
|                                                                                      | Operating cost.                                                                           | ↓ | Total cost. Production cost.               |
|                                                                                      | Employee wages and benefits.                                                              | ↑ | Salary/Benefits.                           |
|                                                                                      | Payments to providers of capital.                                                         | ↑ |                                            |
|                                                                                      | Payments to government.                                                                   | ↑ |                                            |
|                                                                                      | Community investments.                                                                    | ↑ |                                            |
| 2.70. Increase economic productivity (Target 8.2)                                    | Proportion of employees agreed that their productivity has increased.                     | ↑ | Perf_Productivity.                         |
|                                                                                      | Ratio of monthly product value shipped to monthly labor expenditures.                     | ↑ | Cost of labour.                            |
|                                                                                      | Adoption of information technology.                                                       | ↑ |                                            |
|                                                                                      | Technological productivity.                                                               | ↑ |                                            |
| 2.71. Ensure technological upgrading and innovation (Target 8.2)                     | Total number of implemented technological upgrades and innovative practices.              | ↑ | Improvements implemented.                  |
| 2.72. Increase decent job creation (Target 8.3)                                      | Work conditions.                                                                          | ↑ | Work environment. Employees satisfaction.  |
|                                                                                      | Proportion of orders (in NOK) from local suppliers.                                       | ↑ |                                            |
|                                                                                      | Total number and rates of new employee hires.                                             | ↑ | Availability of human resources. Turnover. |
| 2.73. Ensure creativity and innovation (Target 8.3)                                  | Total number of implemented innovative practices.                                         | ↑ | Improvements implemented.                  |
|                                                                                      | Return on implementation of innovative practice.                                          | ↑ |                                            |
|                                                                                      | Proportion of employees by level of education.                                            | - | Competence.                                |
|                                                                                      | Employees' perception of creativity of the company.                                       | ↑ |                                            |
| 2.74. Improve resource efficiency in consumption and production (Target 8.4)         | Energy efficiency (consumption per unit produced).                                        | ↑ | Produced products.                         |
|                                                                                      | Water efficiency (consumption per unit produced).                                         | ↑ | Produced products.                         |
|                                                                                      | Material efficiency (consumption per unit produced).                                      | ↑ | Produced products.                         |
|                                                                                      | Percentage of recycled input materials.                                                   | ↑ |                                            |
|                                                                                      | Percentage of reclaimed products and their packaging materials for each product category. | ↑ |                                            |
|                                                                                      | Duration of product life.                                                                 | ↑ |                                            |
| 2.75. Provide decent work for people, including those with disabilities (Target 8.5) | Total number of employees with disabilities.                                              | - |                                            |
|                                                                                      | Total number and rates of new employee hires.                                             | ↑ | Availability of human resources.           |
|                                                                                      | Employee turnover by age group and gender.                                                | ↓ | Turnover.                                  |
|                                                                                      | Benefits and social protection.                                                           | ↑ | Salary/Benefits.                           |
|                                                                                      | Total number of employees that were entitled to parental leave, by gender.                | - |                                            |
|                                                                                      | Total number of employees that took parental leave, by gender.                            | - |                                            |
|                                                                                      | Return to work and retention rates after parental leave, by gender.                       | ↑ |                                            |
|                                                                                      | Training and education.                                                                   | ↑ |                                            |

|                                                                                         |                                                                                                                                                             |   |                                  |
|-----------------------------------------------------------------------------------------|-------------------------------------------------------------------------------------------------------------------------------------------------------------|---|----------------------------------|
|                                                                                         | Total number of incidents of discrimination and harassment.                                                                                                 | 0 |                                  |
|                                                                                         | Ratio of employees with flexible to fixed working hours.                                                                                                    | ↑ |                                  |
| 2.76. Provide employment to young people (Target 8.5)                                   | Total number of employees' in category under 30 years old.                                                                                                  | ↑ |                                  |
| 2.77. Minimize forced labor (Target 8.7)                                                | Perception of company's performance on human rights by its employees.                                                                                       | ↑ |                                  |
|                                                                                         | Percentage of new suppliers that were screened using human rights criteria.                                                                                 | ↑ |                                  |
| 2.78. Minimize child labor (Target 8.7)                                                 | Operations and suppliers identified as having significant risk for incidents of child labor.                                                                | 0 |                                  |
| 2.79. Improve safe and secure working environment (Target 8.8)                          | Incidents related to occupational health and safety.                                                                                                        | 0 |                                  |
|                                                                                         | Type of injury and rates of injury, occupational diseases, lost days, and absenteeism, and total number of work-related fatalities, by gender.              | ↓ |                                  |
|                                                                                         | Workers with high incidence or high risk of diseases related to their occupation.                                                                           | ↓ |                                  |
|                                                                                         | Total operations and suppliers in which employee rights to exercise freedom of association or collective bargaining may be violated or at significant risk. | ↓ |                                  |
|                                                                                         | Total number of incidents of discrimination and harassment.                                                                                                 | 0 |                                  |
| 2.84. Improve infrastructure (Target 9.1)                                               | Infrastructure investments.                                                                                                                                 | ↑ |                                  |
| 2.85. Increase industry's share of employment and gross domestic product (Target 9.2)   | Total tax paid per year.                                                                                                                                    | ↑ | Revenues.                        |
|                                                                                         | Total number and rates of new employee hires.                                                                                                               | ↑ | Availability of human resources. |
|                                                                                         | Net employment creation expressed as percentage contribution to employment in a region.                                                                     | ↑ |                                  |
| 2.86. Increase the access of small-scale enterprises to financial services (Target 9.3) | Percentage of orders (and invoices) from local SMEs suppliers compared to total orders.                                                                     | ↑ |                                  |
| 2.87. Upgrade infrastructure and retrofit industries (Target 9.4)                       | Total number of implemented technological upgrading projects.                                                                                               | ↑ | Improvements implemented.        |
| 2.88. Increase scientific research (Target 9.5)                                         | Time used for R&D activities as a percentage of total worktime.                                                                                             | ↑ |                                  |
|                                                                                         | ROI in R&D activities.                                                                                                                                      | ↑ |                                  |
|                                                                                         | Total number of cooperation projects with research institutions.                                                                                            | ↑ |                                  |
| 2.93. Increase income of the bottom 40% of population (Target 10.1)                     | Minimal wage for workers per year.                                                                                                                          | ↑ | Salary/Benefits.                 |
| 2.94. Reduce proportion of people below 50% of median income (Target 10.2)              | Minimal wage for workers per year.                                                                                                                          | ↑ | Salary/Benefits.                 |
| 2.95. Reduce inequalities and discrimination (Target 10.3)                              | Total number of incidents of discrimination and harassment.                                                                                                 | 0 |                                  |
|                                                                                         | Training and education.                                                                                                                                     | ↑ |                                  |
|                                                                                         | Benefits provided to full-time employees compared to temporary/part-time employees.                                                                         | ↓ | Salary/Benefits.                 |
| 2.96. Adopt policies to decrease inequality (Target 10.4)                               | Total tax paid per year.                                                                                                                                    | ↑ | Revenues.                        |
|                                                                                         | Percentage of employees in the company in each category, gender, age (under 30 years old, 30-50 years old, over 50 years old), minority groups.             | - |                                  |
|                                                                                         | Average wage for employees within the company in each category, gender, age (under 30 years old, 30-50 years old, over 50 years old), minority groups.      | - |                                  |
| 2.105. Increase access to safe, adequate and affordable housing (Target 11.1)           | Total investments in infrastructure.                                                                                                                        | ↑ |                                  |

|                                                                                                                |                                                                                                                                                                                    |     |                              |
|----------------------------------------------------------------------------------------------------------------|------------------------------------------------------------------------------------------------------------------------------------------------------------------------------------|-----|------------------------------|
| 2.106. Increase access to safe, adequate and affordable transport (Target 11.2)                                | Total investments in infrastructure.                                                                                                                                               | ↑   |                              |
| 2.111. Reduce number of deaths and affected by disasters (Target 11.5)                                         | Disaster risk management.                                                                                                                                                          | Y/N |                              |
| 2.120. Reduce the use of natural resources (Target 12.2)                                                       | Total weight/volume of renewable materials used in production per type of material (raw materials, associated process materials, semi-manufacture parts, packaging materials).     | ↑   |                              |
|                                                                                                                | Total weight/volume of non-renewable materials used in production per type of material (raw materials, associated process materials, semi-manufacture parts, packaging materials). | ↓   |                              |
|                                                                                                                | Energy efficiency (consumption per unit produced).                                                                                                                                 | ↑   | Produced products.           |
|                                                                                                                | Water efficiency (consumption per unit produced).                                                                                                                                  | ↑   | Produced products.           |
|                                                                                                                | Percentage of reclaimed products and their packaging materials for each product category.                                                                                          | ↑   |                              |
| 1.122. Reduce releases to air/water/soil of chemicals and all wastes throughout their life cycle (Target 12.4) | Total air emissions (GHGs, ODS, NOx, SOx, POP, VOC, HAP, PM) during the LC.                                                                                                        | ↓   |                              |
|                                                                                                                | Total weight of waste by type and disposal method during the LC.                                                                                                                   | ↓   |                              |
|                                                                                                                | Total water discharge by quality and destination during the LC.                                                                                                                    | ↓   |                              |
| 2.123. Reduce waste generation (Target 12.5)                                                                   | Total weight of waste by type and disposal method.                                                                                                                                 | ↓   |                              |
|                                                                                                                | Percentage of reclaimed products and their packaging materials for each product category.                                                                                          | ↑   |                              |
| 2.124. Publication of sustainability reports (Target 12.6)                                                     | Comprehensiveness of sustainability report.                                                                                                                                        | ↑   |                              |
|                                                                                                                | Percentage of operations with implemented social impact assessments.                                                                                                               | ↑   |                              |
|                                                                                                                | Percentage of operations with implemented environmental impact assessments.                                                                                                        | ↑   |                              |
| 2.125. Increase the use of sustainable public procurement practices (Target 12.7)                              | Eco-labels/Sustainable certifications for products.                                                                                                                                | ↑   |                              |
|                                                                                                                | Proportion of suppliers ISO 14001 certified.                                                                                                                                       | ↑   |                              |
|                                                                                                                | Percentage of new suppliers that were screened using labor practices criteria.                                                                                                     | ↑   |                              |
|                                                                                                                | Percentage of new suppliers that were screened using environmental criteria.                                                                                                       | ↑   |                              |
|                                                                                                                | Percentage of new suppliers that were screened using human rights criteria.                                                                                                        | ↑   |                              |
|                                                                                                                | Percentage of new suppliers that were screened using criteria for impacts on society.                                                                                              | ↑   |                              |
| 2.126. Promote education about sustainable development (Target 12.8)                                           | Accessibility of product information to customers.                                                                                                                                 | ↑   | Customer satisfaction.       |
|                                                                                                                | Educational initiatives on sustainable development for customers and suppliers.                                                                                                    | ↑   |                              |
| 2.129. Reduce the use of fossil-fuel (Target 12.c)                                                             | Total fossil-fuel energy consumption within the company.                                                                                                                           | ↓   |                              |
|                                                                                                                | Total fossil-fuel energy consumption of suppliers'.                                                                                                                                | ↓   |                              |
|                                                                                                                | Total fossil-fuel energy consumption of logistics.                                                                                                                                 | ↓   |                              |
| 2.130. Increase resilience and adaptive capacity to natural disasters (Target 13.1)                            | Risk management related to climate change.                                                                                                                                         | Y/N |                              |
|                                                                                                                | Environmental protection expenditure.                                                                                                                                              | ↑   | Investments in improvements. |
| 2.132. Improve education on climate change mitigation/adaptation (Target 13.3)                                 | Training and education in climate change projects for stakeholders.                                                                                                                | ↑   |                              |
| 2.133. Increase number of CC mitigation actions (Target 13.3)                                                  | Total environmental expenditures.                                                                                                                                                  | ↑   | Investments in improvements. |
|                                                                                                                | Total investment for pollution prevention and control (air, water, and solid waste).                                                                                               | ↑   | Investments in improvements. |
| 2.135. Reduce marine pollution (Target 14.1)                                                                   | Total water discharge by quality and destination.                                                                                                                                  | ↓   |                              |
|                                                                                                                | Total number and volume of significant spills.                                                                                                                                     | ↓   |                              |
| 2.136. Improve marine and coastal ecosystems (Target 14.2)                                                     | Number of products for reduced fish waste.                                                                                                                                         | ↑   | Sold products.               |
| 2.138. Reduce overfishing (Target 14.4)                                                                        | Number of products to protect juvenile fish.                                                                                                                                       | ↑   | Sold products.               |

|                                                                                            |                                                                                                                                                                  |     |                                                          |
|--------------------------------------------------------------------------------------------|------------------------------------------------------------------------------------------------------------------------------------------------------------------|-----|----------------------------------------------------------|
| 2.139. Reduce destructive fishing practices (Target 14.4)                                  | Number of products to replace destructive fishing practice.                                                                                                      | ↑   | Sold products.                                           |
| 2.144. Increase access for small-scale artisanal fishers to marine resources (Target 14.b) | Product cost for small-scale artisanal fishers.                                                                                                                  | ↑   | Product price.                                           |
| 2.160. Reduce violence and deaths rates related to violence (Target 16.1)                  | Registered cases of workplace violence and harassment.                                                                                                           | ↓   | Work environment. Employees satisfaction.                |
| 2.161. Reduce abuse, exploitation, trafficking and violence against children (Target 16.2) | Operations and suppliers identified as having significant risk for incidents of child labor.                                                                     | 0   |                                                          |
| 2.162. Promote the rule of law at national and international levels (Target 16.3)          | Total monetary value of significant fines for non-compliance with laws and regulations.                                                                          | ↓   | Total cost.                                              |
|                                                                                            | Total number of non-monetary sanctions for non-compliance with laws and regulations.                                                                             | ↓   |                                                          |
|                                                                                            | Total number and percentage of operations assessed for risks related to corruption and the significant risks identified.                                         | ↓   |                                                          |
|                                                                                            | Total number and percentage of employees that the company's anti-corruption policies and procedures have been communicated to, broken down by employee category. | ↑   |                                                          |
| 2.164. Reduce corruption and bribery (Target 16.5)                                         | Total number of confirmed incidents of corruption.                                                                                                               | ↓   |                                                          |
|                                                                                            | Stakeholder engagement plans based on stakeholder mapping.                                                                                                       | ↑   |                                                          |
|                                                                                            | Local community consultation committees and processes that include vulnerable groups.                                                                            | ↑   |                                                          |
|                                                                                            | Works councils, occupational health and safety committees, and other employee representation bodies to deal with impacts.                                        | ↑   |                                                          |
|                                                                                            | Percentage of total workforce represented in formal joint management.                                                                                            | ↑   | Employees empowerment.                                   |
| 2.169. Improve public access to information (Target 16.10)                                 | Publicly available missions and values statement.                                                                                                                | Y/N |                                                          |
|                                                                                            | Publicly available strategy and performance/results.                                                                                                             | Y/N | Unification of organizational and individual objectives. |
| 2.170. Protect fundamental freedoms (Target 16.10)                                         | Total number of substantiated complaints regarding breaches of employees' and customers' privacy and losses of data.                                             | ↓   | Customer satisfaction.                                   |
| 2.172. Reduce discrimination and harassment (Target 16.b)                                  | Total number of incidents of discrimination and harassment.                                                                                                      | 0   | Work environment. Employees satisfaction.                |
| 2.188. Improve public, public-private and civil society partnership (Target 17.17)         | The extent to which the government is present in the shareholding structure.                                                                                     | -   |                                                          |
| 2.190. Improve measurement of progress on sustainable development (Target 17.19)           | Comprehensiveness of sustainability reports (issues covered).                                                                                                    | ↑   |                                                          |

| Sustainability criteria for manufacturing                                                   | Indicators                                                                                                  | Desired direction | Element of organizational model              |
|---------------------------------------------------------------------------------------------|-------------------------------------------------------------------------------------------------------------|-------------------|----------------------------------------------|
| 1.1. Reduce cost of product during the whole LC of the product                              | Total product cost.                                                                                         | ↓                 | Total cost.                                  |
| 1.2. Reduce noise from all processes                                                        | Noise level in the factory.                                                                                 | ↓                 |                                              |
| 1.3. Improve safety of technologies                                                         | Total number of safety incidents.                                                                           | 0                 |                                              |
| 1.4. Reduce pollution to air during the whole LC of the product                             | Total air emissions (GHGs, ODS, NOx, SOx, POP, VOC, HAP, PM) during material extrusion.                     | ↓                 |                                              |
|                                                                                             | Total air emission (GHGs, ODS, NOx, SOx, POP, VOC, HAP, PM) at the suppliers.                               | ↓                 |                                              |
|                                                                                             | Total air emission (GHGs, ODS, NOx, SOx, POP, VOC, HAP, PM) during the production.                          | ↓                 | Produced products. Re-work.                  |
|                                                                                             | Total air emission (GHGs, ODS, NOx, SOx, POP, VOC, HAP, PM) during the distribution.                        | ↓                 |                                              |
|                                                                                             | Total air emission (GHGs, ODS, NOx, SOx, POP, VOC, HAP, PM) during the use.                                 | ↓                 |                                              |
| 1.5. Improve customers satisfaction                                                         | Customer satisfaction.                                                                                      | ↑                 | Customer satisfaction.                       |
| 1.6. Minimize the use of non-renewable natural resources during the whole LC of the product | Ratio of non-renewable natural resources compared to renewable during the production.                       | ↓                 |                                              |
|                                                                                             | Ratio of non-renewable natural resources compared to renewable during the material extrusion.               | ↓                 |                                              |
|                                                                                             | Ratio of non-renewable natural resources compared to renewable during the transportation.                   | ↓                 |                                              |
|                                                                                             | Ratio of non-renewable natural resources compared to renewable at the suppliers.                            | ↓                 |                                              |
| 1.7. Increase value creation for society                                                    | End users' quality of life.                                                                                 | ↑                 |                                              |
| 1.8. Minimize the use of non-renewable energy during the LC of the product                  | Ratio of non-renewable energy compared to renewable during the production.                                  | ↓                 |                                              |
|                                                                                             | Ratio of non-renewable energy compared to renewable during the material extrusion.                          | ↓                 |                                              |
|                                                                                             | Ratio of non-renewable energy compared to renewable during the transportation.                              | ↓                 |                                              |
|                                                                                             | Ratio of non-renewable energy compared to renewable at the suppliers.                                       | ↓                 |                                              |
| 1.9. Minimize the use of land during the product LC                                         | Use of land for extrusion & production.                                                                     | ↓                 |                                              |
| 1.10. Maximize new opportunities for organization                                           | Number of projects with research institutes.                                                                | ↑                 |                                              |
|                                                                                             | Investments in R&D, NOK & % from total investments.                                                         | ↑                 | Investments in improvements.                 |
| 1.11. Reduce generation of waste during the whole LC of the product                         | Total weight of waste by type and disposal method during the LC.                                            | ↓                 |                                              |
|                                                                                             | Total scrap produced.                                                                                       | ↓                 | Products out of specification.               |
| 1.12. Ensure competitiveness of the product                                                 | Cost of product compared to similar products.                                                               | ↓                 | Product price.                               |
|                                                                                             | Quality of product compared to competitors.                                                                 | ↑                 | Product quality.                             |
| 1.13. Ensure competitiveness of the organization                                            | Organizational income.                                                                                      | ↑                 | Income.                                      |
|                                                                                             | Organizational image.                                                                                       | ↑                 | Customers' incoming orders.                  |
|                                                                                             | Technological advancement.                                                                                  | ↑                 | Investment in new equipment, new approaches. |
| 1.14. Improve employees' rights and development                                             | Employees' rights to privacy, fair compensation, and freedom from discrimination.                           | ↑                 |                                              |
|                                                                                             | Employees training and education.                                                                           | ↑                 |                                              |
|                                                                                             | Number of courses/conferences/workshops attended.                                                           | ↑                 |                                              |
|                                                                                             | Investment in employee training and education as percentage of net sales.                                   | ↑                 | Investments in improvements.                 |
| 1.15. Improve operational effectiveness                                                     | Relationship between the planned production cycle to complete a batch and the actual production cycle time. | ↑                 | Manufacturing schedule adherence.            |
|                                                                                             | Total defects (requires rework, repair, reprocessing).                                                      | ↓                 | Re-work. Products out of specification.      |
|                                                                                             | OEE.                                                                                                        | ↑                 | OEE.                                         |
|                                                                                             | Yield loss.                                                                                                 | ↓                 | Quality yield.                               |



|                                                                                                                 |                                                                                                                                                              |   |                                                                        |
|-----------------------------------------------------------------------------------------------------------------|--------------------------------------------------------------------------------------------------------------------------------------------------------------|---|------------------------------------------------------------------------|
| 1.16. Improve operational efficiency                                                                            | Output ratio in time unit (actual versus planned output).                                                                                                    | ↑ | Manufacturing schedule adherence.                                      |
|                                                                                                                 | Ratio of the value added production time to total production time.                                                                                           | ↑ |                                                                        |
|                                                                                                                 | Changeover time.                                                                                                                                             | ↓ | Changeover time.                                                       |
| 1.17. Ensure social equity                                                                                      | Difference between access to benefits among categories of employees.                                                                                         | ↓ | Salary/Benefits.                                                       |
| 1.18. Increase functionality of the product                                                                     | Product's functionality perceived by customer.                                                                                                               | ↑ | Customer satisfaction.                                                 |
| 1.19. Protect personal health during the whole LC of the product/service                                        | Health impact of the product in use.                                                                                                                         | ↓ |                                                                        |
|                                                                                                                 | Type of injury and rates of injury, occupational diseases, lost days, and absenteeism, and total number of work-related fatalities, by region and by gender. | ↓ | Sick leave.                                                            |
|                                                                                                                 | Workers with high incidence or high risk of diseases related to their occupation.                                                                            | ↓ |                                                                        |
| 1.20. Increase innovation (through innovative techniques/ methods/ technologies/ practices/ products/ services) | Total number of implemented innovative practices.                                                                                                            | ↑ | Improvements implemented. Investment in new equipment, new approaches. |
|                                                                                                                 | Return on implementation of innovative practice.                                                                                                             | ↑ |                                                                        |
|                                                                                                                 | Proportion of employees by level of education.                                                                                                               | - | Competence.                                                            |
| 1.21. Improve information security and cybersecurity                                                            | Information security incidents.                                                                                                                              | ↓ |                                                                        |
| 1.22. Enhance learning of employees                                                                             | Investment in employee training and education as percentage of net sales.                                                                                    | ↑ |                                                                        |
|                                                                                                                 | Number of courses/conferences/workshops attended.                                                                                                            | ↑ |                                                                        |
| 1.23. Improve conditions of work and social protection for employees                                            | Conditions of work evaluated by employees.                                                                                                                   | ↑ | Work environment.                                                      |
|                                                                                                                 | Paid days off.                                                                                                                                               | ↑ | Salary/Benefits.                                                       |
| 1.24. Increase organizational productivity                                                                      | Ratio of produced to ordered products.                                                                                                                       | ↑ | Orders backlog.                                                        |
|                                                                                                                 | Ratio of sales per employee.                                                                                                                                 | ↑ |                                                                        |
|                                                                                                                 | Ratio of produced products to labour-hours.                                                                                                                  | ↑ | Produced products.                                                     |
| 1.25. Increase organizational profitability                                                                     | Profit.                                                                                                                                                      | ↑ | Income.                                                                |
|                                                                                                                 | Manufacturing cost as a percentage of revenue.                                                                                                               | ↓ | Production cost. Revenue.                                              |
|                                                                                                                 | Liquidity.                                                                                                                                                   | ↑ |                                                                        |
| 1.26. Improve quality of the product                                                                            | Total number of rejected/returned products by customer.                                                                                                      | ↓ | Customer complaints.                                                   |
|                                                                                                                 | Product durability.                                                                                                                                          | ↑ | Product quality. Product problems after installation.                  |
| 1.27. Improve quality of the process                                                                            | Yield for process.                                                                                                                                           | ↑ | Quality yield.                                                         |
| 1.28. Improve quality of systems                                                                                | Yield for production system.                                                                                                                                 | ↑ |                                                                        |
| 1.29. Improve reliability of the product                                                                        | Failure rate of product in use.                                                                                                                              | ↓ | Equipment failure.                                                     |
| 1.30. Improve reliability of processes                                                                          | Mean Time Between Failure in a process.                                                                                                                      | ↑ | Equipment failure.                                                     |
|                                                                                                                 | Failure Rate of process.                                                                                                                                     | ↓ | Equipment failure.                                                     |
|                                                                                                                 | Ratio of corrective maintenance time in relation to the total maintenance (planned and corrective).                                                          | ↓ | Preventive maintenance. Reactive maintenance.                          |
| 1.31. Improve reliability of technologies                                                                       | Mean Time Between Failure for equipment.                                                                                                                     | ↑ | Equipment failure.                                                     |
|                                                                                                                 | Failure Rate of equipment.                                                                                                                                   | ↓ | Equipment failure.                                                     |
| 1.32. Improve reliability of systems                                                                            | Mean Time Between Failure for production system.                                                                                                             | ↑ |                                                                        |

|                                                                              |                                                                                                                                                                                               |   |                                                  |
|------------------------------------------------------------------------------|-----------------------------------------------------------------------------------------------------------------------------------------------------------------------------------------------|---|--------------------------------------------------|
|                                                                              | Failure Rate of production system.                                                                                                                                                            | ↓ |                                                  |
|                                                                              | Number of emergency events or unplanned shutdowns                                                                                                                                             | ↓ | Unplanned stops.                                 |
| 1.33. Improve safety of the product                                          | Total number of incidents of non-compliance with regulations and voluntary codes concerning the health and safety impacts of products.                                                        | ↓ |                                                  |
| 1.34. Improve safety of processes                                            | Hours of safety training per employee.                                                                                                                                                        | ↑ |                                                  |
|                                                                              | Safety incidents for process.                                                                                                                                                                 | 0 |                                                  |
| 1.35. Ensure fairness on employee wages and benefits                         | Minimal wage for workers per year.                                                                                                                                                            | ↑ | Salary/Benefits                                  |
|                                                                              | Ratio of local minimum wage to the company's entry level wage by gender.                                                                                                                      | ↑ | Salary/Benefits.                                 |
| 1.36. Reduce employee turnover                                               | Employees turnover per year.                                                                                                                                                                  | ↓ | Turnover.                                        |
| 1.37. Protect biodiversity                                                   | Investments in biodiversity.                                                                                                                                                                  | ↑ |                                                  |
| 1.38. No bribery and corruption                                              | Total number and percentage of employees that the company's anti-corruption policies and procedures have been communicated to, broken down by employee category.                              | ↑ |                                                  |
|                                                                              | Total number of confirmed incidents of corruption.                                                                                                                                            | ↓ |                                                  |
| 1.39. Improve professional knowledge and competence of employees             | Percentage of employees who agree that their knowledge and competence has been increased.                                                                                                     | ↑ | Competence.                                      |
| 1.40. Improve safety of systems                                              | Safety incidents in production systems.                                                                                                                                                       | 0 |                                                  |
| 1.41. Ensure compatible salary                                               | Rate of salary compared to average in industry.                                                                                                                                               | ↑ | Salary/Benefits.                                 |
| 1.42. Reduce pollution to soil during the whole LC of the product            | Pollution to soil in production.                                                                                                                                                              | ↓ |                                                  |
|                                                                              | Pollution to soil in suppliers' production.                                                                                                                                                   | ↓ |                                                  |
|                                                                              | Pollution to soil during transportation.                                                                                                                                                      | ↓ |                                                  |
|                                                                              | Pollution to soil during the use.                                                                                                                                                             | ↓ |                                                  |
| 1.43. Improve employees satisfaction                                         | Percentage of employees satisfied with their work.                                                                                                                                            | ↑ | Employees satisfaction.                          |
|                                                                              | Percentage of employees feel motivated at work.                                                                                                                                               | ↑ | Motivation. Improvements suggested by employees. |
|                                                                              | Total grievances registered and resolved.                                                                                                                                                     | ↓ | Work environment.                                |
| 1.44. Minimize the use of toxic materials during the whole LC of the product | Toxic materials in production.                                                                                                                                                                | ↓ |                                                  |
|                                                                              | Toxic materials in product.                                                                                                                                                                   | ↓ |                                                  |
| 1.45. Increase employee involvement and empowerment                          | Percentage of employees who agree that company involve and encourage employees.                                                                                                               | ↑ | Employees empowerment. Employees engagement.     |
|                                                                              | Percentage of employees that are shareholders in the company.                                                                                                                                 | ↑ |                                                  |
|                                                                              | Number of suggested improvements by employee.                                                                                                                                                 | ↑ | Improvements suggested by employees.             |
| 1.46. Provide democratic processes and accountable governance structures     | Percentage of total employees covered by collective bargaining agreements.                                                                                                                    | ↑ |                                                  |
|                                                                              | Composition of the governance body and its committees by: executive or non-executive, gender, competences relating to economic, environmental and social impacts, stakeholder representation. | - |                                                  |
|                                                                              | Company's openness to stakeholder review and participation in decision-making process.                                                                                                        | ↑ |                                                  |
| 1.47. Minimize the use of water during the whole LC of the product           | Total water withdrawal in production.                                                                                                                                                         | ↓ |                                                  |
|                                                                              | Total water withdrawal by suppliers.                                                                                                                                                          | ↓ |                                                  |
|                                                                              | Total water withdrawal in use.                                                                                                                                                                | ↓ |                                                  |
| 1.48. Increasing the wealth of the society                                   | Total number and rates of new employee hires.                                                                                                                                                 | ↑ |                                                  |
|                                                                              | Societal investment.                                                                                                                                                                          | ↑ |                                                  |

|                                                                       |                                                                                                                                                              |   |                                       |
|-----------------------------------------------------------------------|--------------------------------------------------------------------------------------------------------------------------------------------------------------|---|---------------------------------------|
| 1.49. Improve the quality of life (employees, customers, and society) | Quality of life evaluated by employees.                                                                                                                      | ↑ | Employees satisfaction.               |
| 1.50. Decrease in the frequency of environmental accidents            | Environmental accidents in production.                                                                                                                       | 0 |                                       |
| 1.51. Provide equitable opportunities for all employees               | Percentage of employees feeling equitable opportunities for development.                                                                                     | ↑ | Employees satisfaction.               |
| 1.52. Ensure organizational survival                                  | Market share.                                                                                                                                                | ↑ | Market success.                       |
|                                                                       | Organizational income.                                                                                                                                       | ↑ | Income.                               |
|                                                                       | Return on average capital employed (ROACE).                                                                                                                  | ↑ |                                       |
| 1.53. Encourage workplace diversity                                   | Percentage of employees within the company in each category, gender, age (under 30 years old, 30-50 years old, over 50 years old), minority groups.          | - |                                       |
| 1.54. Ensure acceptable working hours                                 | Hours of overwork per employee.                                                                                                                              | ↓ | Excessive work overload per employee. |
|                                                                       | Percentage of working hours outside of normal working hours.                                                                                                 | ↓ |                                       |
| 1.55. Improve company reputation                                      | Reputation of the company.                                                                                                                                   | ↑ | Potential customers.                  |
|                                                                       | Number of complaints received from the community.                                                                                                            | ↓ |                                       |
|                                                                       | Total number of sanctions for noncompliance with laws and regulations.                                                                                       | ↓ |                                       |
| 1.56. Maximize effectiveness of product over the whole LC             | Duration of product life.                                                                                                                                    | ↑ |                                       |
| 1.57. Reduce pollution to water during the whole LC of the product    | Quality of discharged water from production.                                                                                                                 | ↑ |                                       |
|                                                                       | Quality of discharged water at suppliers' sites.                                                                                                             | ↑ |                                       |
|                                                                       | Total amount of pollutants to water during transportation.                                                                                                   | ↓ |                                       |
|                                                                       | Total amount of pollutants to water during the use.                                                                                                          | ↓ |                                       |
| 1.58. Ensure conformance to laws and regulations                      | Cases of law and regulations violation.                                                                                                                      | ↓ |                                       |
| 1.59. Ensure fair competition                                         | Total number of legal actions for anti-competitive behavior, anti-trust, and monopoly practices.                                                             | ↓ |                                       |
| 1.60. Increase productivity of employees                              | Percentage of employees agreed that their productivity has increased.                                                                                        | ↑ | Perf_Productivity.                    |
|                                                                       | Ratio of monthly product value shipped to monthly labor expenditures,                                                                                        | ↑ |                                       |
| 1.61. Improve occupational health and safety                          | Type of injury and rates of injury, occupational diseases, lost days, and absenteeism, and total number of work-related fatalities, by region and by gender. | ↓ |                                       |
| 1.62. Ensure freedom of association and collective bargaining         | Percentage of employees feeling the freedom of associations.                                                                                                 | ↑ |                                       |
|                                                                       | Number of employees in associations.                                                                                                                         | ↑ |                                       |
|                                                                       | Total operations and suppliers in which employee rights to exercise freedom of association or collective bargaining may be violated or at significant risk.  | ↓ |                                       |
| 1.63. Reduce discrimination                                           | Total number of incidents of discrimination and harassment.                                                                                                  | 0 | Work environment.                     |
| 1.64. Improve restoration of natural habitats                         | Investments in restoration of natural habitats.                                                                                                              | ↑ |                                       |
| 1.65. Increase employment creation                                    | Net employment creation expressed as percentage contribution to employment in a region.                                                                      | ↑ |                                       |
|                                                                       | Total number and rates of new employee hires.                                                                                                                | ↑ |                                       |
|                                                                       | Proportion of orders (in NOK) from local suppliers.                                                                                                          | ↑ |                                       |
| 1.66. Improve well-being of local communities                         | Investments into community projects (e.g., schools, hospitals, infrastructure) as percentage of revenues.                                                    | ↑ |                                       |
|                                                                       | Local community development programs based on local communities' needs.                                                                                      | ↑ |                                       |
|                                                                       | Proportion of employees hired from the local community.                                                                                                      | ↑ |                                       |

|                                                   |                                                                                                                                              |   |                                       |
|---------------------------------------------------|----------------------------------------------------------------------------------------------------------------------------------------------|---|---------------------------------------|
|                                                   | Proportion of orders (in NOK) from local suppliers.                                                                                          | ↑ |                                       |
| 1.67. Ensure human rights for employees           | Cases of violation of human rights.                                                                                                          | 0 | Work environment.                     |
|                                                   | Perception of company's performance on human rights by its employees.                                                                        | ↑ |                                       |
| 1.68. Improve work-life balance for employees     | Total hours of overwork.                                                                                                                     | ↓ | Excessive work overload per employee. |
| 1.69. Respect indigenous rights                   | Total number of incidents of violations involving rights of indigenous peoples.                                                              | 0 |                                       |
| 1.70. Responsible political involvement           | Participation in public policy development.                                                                                                  | ↑ |                                       |
| 1.71. Increase social investment                  | Total social investment.                                                                                                                     | ↑ |                                       |
| 1.72. Increase supplier support and collaboration | Improvements projects for suppliers.                                                                                                         | ↑ |                                       |
|                                                   | Suppliers owned or staffed by members of vulnerable, marginalized or underrepresented social groups.                                         | ↑ |                                       |
| 1.73. Ensure customers' rights                    | Total number of substantiated complaints regarding breaches of customer privacy and losses of customer data                                  | ↓ |                                       |
| 1.74. Increase stakeholder engagement             | Percentage of stakeholders agreed that they are engaged in decision-making.                                                                  | ↑ |                                       |
|                                                   | Policy and procedures involving consultation and negotiation with employees over changes in the company (e.g., restructuring, redundancies). | ↑ |                                       |
|                                                   | Summary of the policy on stakeholder involvement,                                                                                            | - |                                       |
| 1.75. Threat suppliers fairly                     | Ratio of supplier price to market price.                                                                                                     | ↑ |                                       |

# CSA tool for Company D

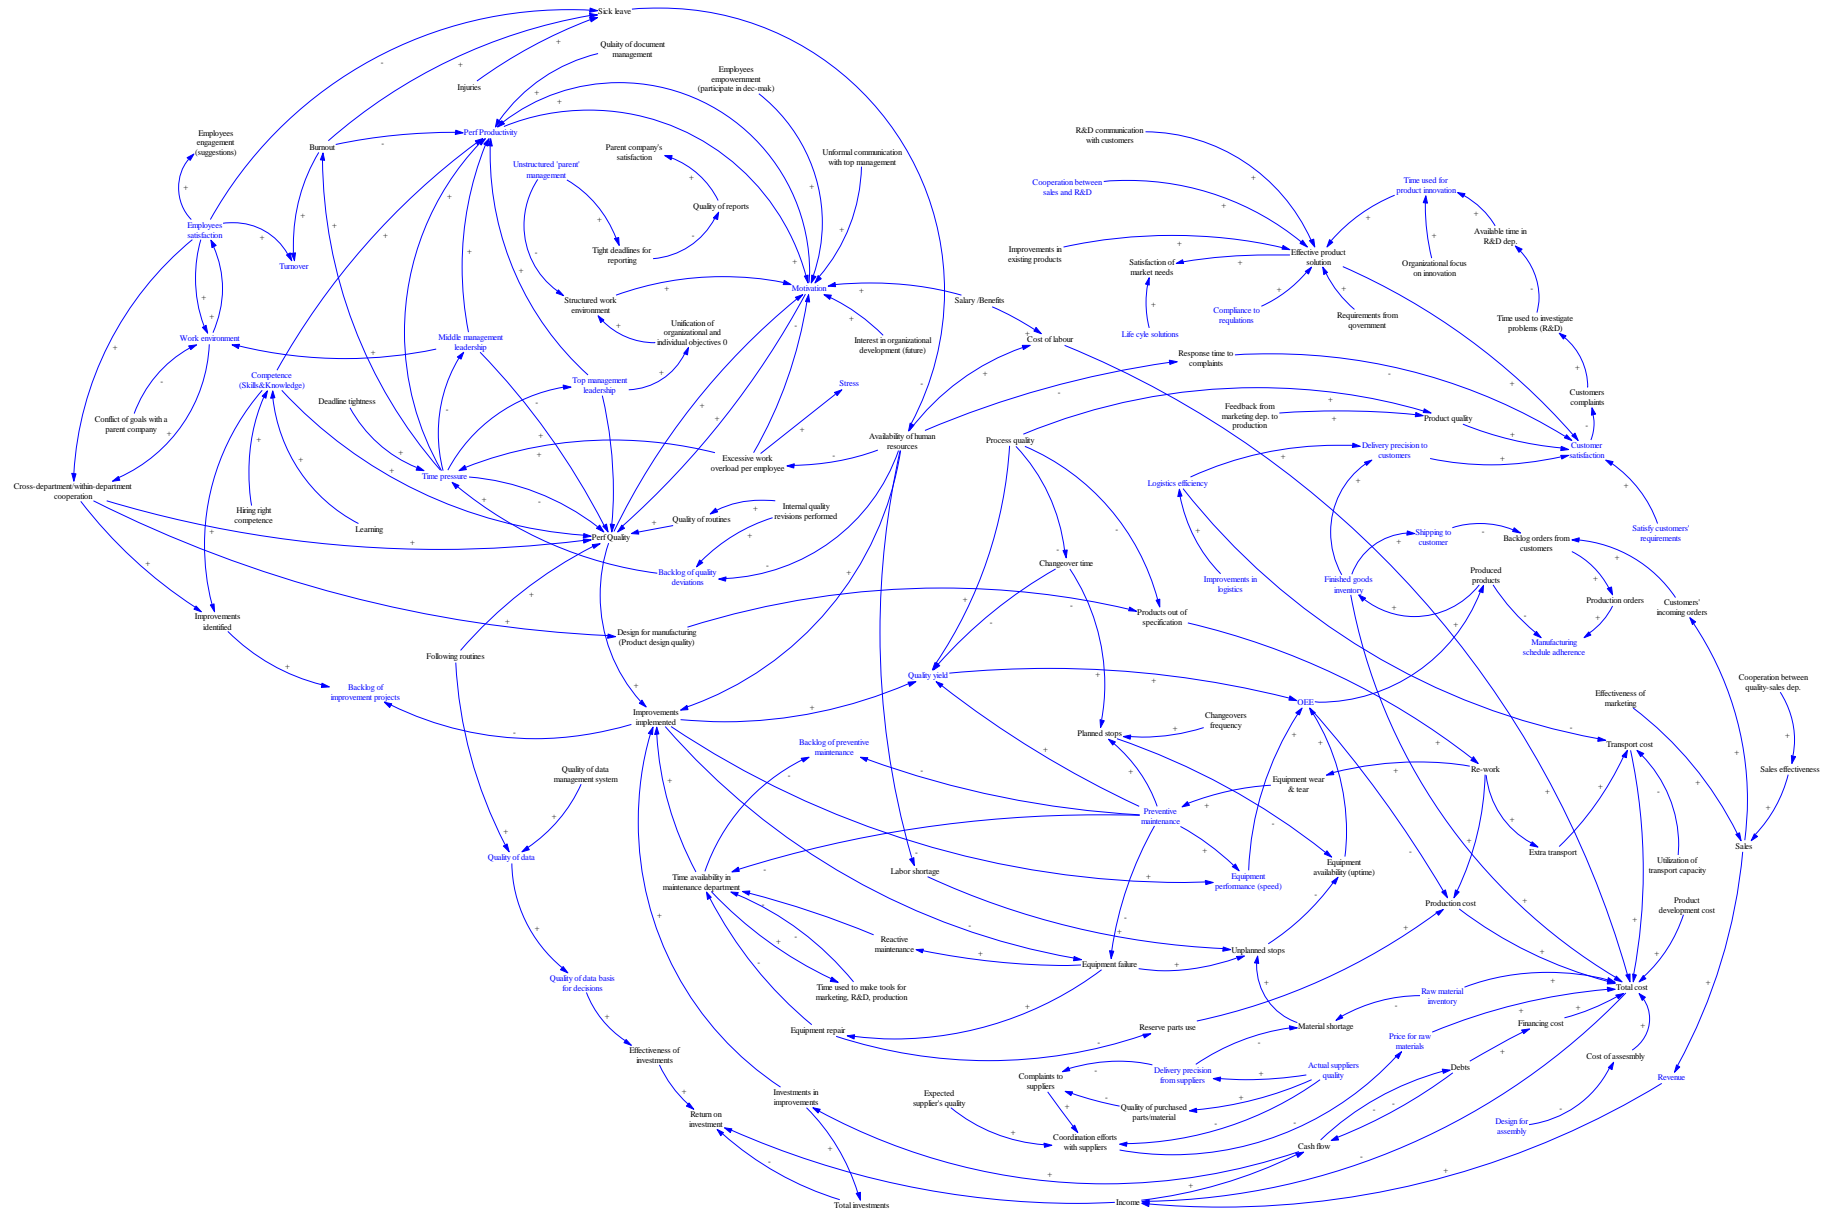

| Sustainability criteria for world                                                                            | Indicators                                                                                                                                                   | Desired direction | Element of organizational model                                                                                                    |
|--------------------------------------------------------------------------------------------------------------|--------------------------------------------------------------------------------------------------------------------------------------------------------------|-------------------|------------------------------------------------------------------------------------------------------------------------------------|
| 2.1. Reduce extreme poverty (Target 1.1, 1.2)                                                                | Minimal wage for workers per year.                                                                                                                           | ↑                 | Salary/Benefits.                                                                                                                   |
|                                                                                                              | Total tax paid per year.                                                                                                                                     | ↑                 | Revenue.                                                                                                                           |
|                                                                                                              | Range of benefits for workers.                                                                                                                               | ↑                 | Salary/Benefits.                                                                                                                   |
|                                                                                                              | Ration of supplier price to market price.                                                                                                                    | ↑                 | Price for raw materials.                                                                                                           |
| 2.2. Improve nationally social protection systems and measures (Target 1.3)                                  | Social security benefits for workers.                                                                                                                        | ↑                 | Salary/Benefits.                                                                                                                   |
|                                                                                                              | Number of employees with insurance, per type of insurance.                                                                                                   | ↑                 | Salary/Benefits.                                                                                                                   |
| 2.3. Ensure equal rights to basic services (e.g., new technology) (Target 1.4)                               | Number of new solutions/techniques/technologies implemented.                                                                                                 | ↑                 | Improvements implemented.<br>Improvements in existing products.<br>Time used for product innovation.<br>Improvements in logistics. |
| 2.4. Reduce exposure and vulnerability to climate-related extreme events. (Target 1.5)                       | Risk management related to climate-related events.                                                                                                           | Y/N               |                                                                                                                                    |
|                                                                                                              | Investments in resilience to environmental hazards and resource scarcity, NOK & % of all investments.                                                        | ↑                 | Total investments.                                                                                                                 |
| 2.19. Reduce maternal mortality (Target 3.1)                                                                 | Maternity/paternity leave.                                                                                                                                   | ↑                 |                                                                                                                                    |
|                                                                                                              | Total number of incidents of discrimination against pregnancy.                                                                                               | ↓                 |                                                                                                                                    |
|                                                                                                              | Decent working conditions for female employees.                                                                                                              | ↑                 | Work environment. Employees satisfaction.                                                                                          |
| 2.22. Reduce mortality from non-communicable diseases (Target 3.4)                                           | Type of injury and rates of injury, occupational diseases, lost days, and absenteeism, and total number of work related fatalities, by region and by gender. | ↓                 | Injuries.                                                                                                                          |
|                                                                                                              | Total hours of overwork.                                                                                                                                     | ↓                 |                                                                                                                                    |
|                                                                                                              | Hours of overwork per employee.                                                                                                                              | ↓                 | Excessive work overload per employee.                                                                                              |
|                                                                                                              | Type of benefits for parents.                                                                                                                                | -                 | Salary/Benefits.                                                                                                                   |
|                                                                                                              | Total air emission (GHGs, ODS, NOx, SOx, POP, VOC, HAP, PM).                                                                                                 | ↓                 | Produced products. Re-work.                                                                                                        |
|                                                                                                              | Total number and volume of significant spills.                                                                                                               | ↓                 |                                                                                                                                    |
|                                                                                                              | Total water discharge by quality and destination.                                                                                                            | ↓                 |                                                                                                                                    |
|                                                                                                              | Human health impact (e.g., ionizing radiation, human toxicity, respiratory inorganics).                                                                      | ↓                 |                                                                                                                                    |
|                                                                                                              |                                                                                                                                                              |                   |                                                                                                                                    |
| 2.24. Reduce number of deaths and injuries from road traffic accidents (Target 3.6)                          | Legal complaints against vehicles owned by company.                                                                                                          | ↓                 |                                                                                                                                    |
| 2.26. Increase health coverage (Target 3.8)                                                                  | Percentage of employees with life insurance, disability, and invalidity coverage.                                                                            | ↑                 |                                                                                                                                    |
| 2.27. Reduce deaths and illness from hazardous chemicals (Target 3.9)                                        | Total amount of hazardous chemicals used in production.                                                                                                      | ↓                 |                                                                                                                                    |
|                                                                                                              | Total amount of hazardous chemicals in a product.                                                                                                            | ↓                 |                                                                                                                                    |
| 2.28. Reduce deaths and illness from air, water, and soil pollution and contamination (Target 3.9)           | Total air emission (GHGs, ODS, NOx, SOx, POP, VOC, HAP, PM).                                                                                                 | ↑                 | Produced products. Re-work.                                                                                                        |
|                                                                                                              | Water quality within the company.                                                                                                                            | ↑                 |                                                                                                                                    |
|                                                                                                              | Total water discharge by quality and destination.                                                                                                            | ↓                 |                                                                                                                                    |
|                                                                                                              | Total weight of waste by type and disposal method.                                                                                                           | ↓                 |                                                                                                                                    |
| 2.33. Ensure free, equitable and quality primary and secondary education for all girls and boys (Target 4.1) | Operations and suppliers identified as having significant risk for incidents of child labor.                                                                 | 0                 |                                                                                                                                    |

|                                                                                                                              |                                                                                                                                                                 |     |                                           |
|------------------------------------------------------------------------------------------------------------------------------|-----------------------------------------------------------------------------------------------------------------------------------------------------------------|-----|-------------------------------------------|
| 2.34. Ensure access to quality early childhood development, care and pre-primary education (Target 4.2)                      | Type of support for parents.                                                                                                                                    | -   | Salary/Benefits.                          |
| 2.35. Ensure equal access to affordable and quality technical, vocational and tertiary education (Target 4.3)                | Average hours of training per year per employee by gender, and by employee category.                                                                            | ↑   | Learning.                                 |
|                                                                                                                              | Programs for skills management and lifelong learning that support the continued employability of employees.                                                     | ↑   | Learning.                                 |
| 2.36. Increase the number of youth and adults with relevant skills for development/decent jobs/entrepreneurship (Target 4.4) | Percentage of employees receiving regular performance and career development reviews, by gender and age.                                                        | ↑   | Learning.                                 |
|                                                                                                                              | Programs for skills management and lifelong learning that support the continued employability of employees.                                                     | ↑   | Learning.                                 |
| 2.37. Eliminate genders disparities in education (Target 4.5)                                                                | Training, internship programs, and further education without discrimination.                                                                                    | ↑   | Learning.                                 |
| 2.38. Ensure access to education/training for vulnerable (Target 4.5)                                                        | Percentage of employees receiving regular performance and career development reviews, by gender and by employee category.                                       | ↑   | Learning.                                 |
| 2.40. Improve knowledge and skills to promote SD (Target 4.7)                                                                | Percentage of employees trained in sustainability initiatives and sustainable development concept, including specific topics on women's rights, water use, etc. | ↑   | Learning.                                 |
| 2.44. Reduce discrimination against all women/girls (Target 5.1)                                                             | Percentage of employees in the company by gender.                                                                                                               | -   |                                           |
|                                                                                                                              | Percentage of women in senior executive and senior and middle management ranks.                                                                                 | ↑   |                                           |
|                                                                                                                              | Total number of incidents of discrimination and harassment.                                                                                                     | 0   | Work environment. Employees satisfaction. |
|                                                                                                                              | Total number of employees that took parental leave, by gender.                                                                                                  | -   |                                           |
| 2.45. Eliminate violence against women (Target 5.2)                                                                          | Registered cases of workplace violence and harassment against women.                                                                                            | 0   | Work environment. Employees satisfaction. |
| 2.47. Recognize unpaid domestic work and care (Target 5.4.)                                                                  | Benefits provided to full-time employees compared to temporary/part-time employees.                                                                             | ↓   | Salary/Benefits.                          |
|                                                                                                                              | Flexible work option.                                                                                                                                           | ↑   | Salary/Benefits.                          |
|                                                                                                                              | Total number of employees that took parental leave, by gender.                                                                                                  | -   |                                           |
| 2.48. Ensure equal opportunities for women for leadership (Target 5.5)                                                       | Percentage of women in senior executive and senior and middle management ranks.                                                                                 | ↑   |                                           |
| 2.53. Promote gender equality (Target 5.c)                                                                                   | Percentage of employees in the company by gender.                                                                                                               | -   |                                           |
|                                                                                                                              | Percentage of women in senior executive and senior and middle management ranks.                                                                                 | ↑   |                                           |
|                                                                                                                              | Ratio of basic salary and remuneration of women to men by employee category.                                                                                    | -   | Salary/Benefits.                          |
| 2.54. Increase access to safe and affordable drinking water (Target 6.1)                                                     | Total water withdrawal.                                                                                                                                         | ↓   |                                           |
|                                                                                                                              | Total volume of water recycled and reused by the company.                                                                                                       | ↑   |                                           |
|                                                                                                                              | Total water discharge by quality and destination.                                                                                                               | ↓   |                                           |
|                                                                                                                              | Total number of products for safe drinking water.                                                                                                               | ↑   | Produced products.                        |
| 2.55. Increase sanitation and hygiene (Target 6.2)                                                                           | Waste management.                                                                                                                                               | ↑   |                                           |
|                                                                                                                              | Access to sanitation facility (% of employees with access to a sanitation facility compared to all employees).                                                  | ↑   |                                           |
|                                                                                                                              | Sanitation and hygiene management.                                                                                                                              | Y/N |                                           |
| 2.56. Improve water quality (Target 6.3)                                                                                     | Total water discharge by quality and destination.                                                                                                               | ↓   |                                           |
|                                                                                                                              | Water efficiency (consumption per unit produced) within the company.                                                                                            | ↑   | Produced products.                        |

|                                                                              |                                                                              |   |                                                                                                                                                                           |
|------------------------------------------------------------------------------|------------------------------------------------------------------------------|---|---------------------------------------------------------------------------------------------------------------------------------------------------------------------------|
| 2.57. Increase water-use efficiency (Target 6.4)                             | Water efficiency (consumption per unit produced) at the suppliers' sites.    | ↑ | Produced products.                                                                                                                                                        |
|                                                                              | Total water discharge by quality and destination                             | ↓ |                                                                                                                                                                           |
| 2.58. Reduce water scarcity (Target 6.4)                                     | Total water withdrawal.                                                      | ↓ |                                                                                                                                                                           |
|                                                                              | Total volume of water recycled and reused by the company.                    | ↑ |                                                                                                                                                                           |
| 2.59. Improve water resources management (Target 6.5)                        | Total number of products for safe drinking water.                            | ↑ | Produced products.                                                                                                                                                        |
| 2.60. Protect and restore water-related ecosystems (Target 6.6)              | Total water discharge by quality and destination.                            | ↓ |                                                                                                                                                                           |
|                                                                              | Investments in environmental protection.                                     | ↑ | Total investments.                                                                                                                                                        |
| 2.64. Increase the use of renewable energy (Target 7.2)                      | Proportion of renewable energy used in the company.                          | ↑ |                                                                                                                                                                           |
| 2.65. Improve energy efficiency (Target 7.3)                                 | Energy efficiency (consumption per unit produced).                           | ↑ | Produced products.                                                                                                                                                        |
|                                                                              | Energy intensity (consumption per monetary unit of sales).                   | ↓ | Produced products.                                                                                                                                                        |
| 2.69. Sustain economic growth (Target 8.1)                                   | Revenues.                                                                    | ↑ | Revenue.                                                                                                                                                                  |
|                                                                              | Total tax paid per year.                                                     | ↑ | Revenue.                                                                                                                                                                  |
|                                                                              | Operating cost.                                                              | ↓ | Total cost. Production cost.                                                                                                                                              |
|                                                                              | Employee wages and benefits.                                                 | ↑ | Salary/Benefits.                                                                                                                                                          |
|                                                                              | Payments to providers of capital.                                            | ↑ |                                                                                                                                                                           |
|                                                                              | Payments to government.                                                      | ↑ |                                                                                                                                                                           |
|                                                                              | Community investments.                                                       | ↑ | Total investments.                                                                                                                                                        |
| 2.70. Increase economic productivity (Target 8.2)                            | Proportion of employees agreed that their productivity has increased.        | ↑ | Prof_Productivity.                                                                                                                                                        |
|                                                                              | Ratio of monthly product value shipped to monthly labor expenditures.        | ↑ | Cost of labour. Shipping to customer.                                                                                                                                     |
|                                                                              | Adoption of information technology.                                          | ↑ |                                                                                                                                                                           |
|                                                                              | Technological productivity.                                                  | ↑ |                                                                                                                                                                           |
| 2.71. Ensure technological upgrading and innovation (Target 8.2)             | Total number of implemented technological upgrades and innovative practices. | ↑ | Improvements implemented.<br>Improvements in existing products.<br>Time used for product innovation.<br>Improvements in logistics.<br>Organizational focus on innovation. |
| 2.72. Increase decent job creation (Target 8.3)                              | Work conditions.                                                             | ↑ | Work environment.                                                                                                                                                         |
|                                                                              | Proportion of orders (in NOK) from local suppliers.                          | ↑ |                                                                                                                                                                           |
|                                                                              | Total number and rates of new employee hires.                                | ↑ | Hiring new competence.                                                                                                                                                    |
| 2.73. Ensure creativity and innovation (Target 8.3)                          | Total number of implemented innovative practices.                            | ↑ | Improvements implemented.<br>Improvements in existing products.<br>Time used for product innovation.<br>Improvements in logistics.<br>Organizational focus on innovation. |
|                                                                              | Return on implementation of innovative practice.                             | ↑ | Return on investments.                                                                                                                                                    |
|                                                                              | Proportion of employees by level of education.                               | - | Competence.                                                                                                                                                               |
|                                                                              | Employees' perception of creativity of the company.                          | ↑ |                                                                                                                                                                           |
|                                                                              |                                                                              |   |                                                                                                                                                                           |
| 2.74. Improve resource efficiency in consumption and production (Target 8.4) | Energy efficiency (consumption per unit produced).                           | ↑ | Produced products.                                                                                                                                                        |
|                                                                              | Water efficiency (consumption per unit produced).                            | ↑ | Produced products.                                                                                                                                                        |
|                                                                              | Material efficiency (consumption per unit produced).                         | ↑ | Produced products.                                                                                                                                                        |



|                                                                                         |                                                                                                                                                             |   |                                                        |
|-----------------------------------------------------------------------------------------|-------------------------------------------------------------------------------------------------------------------------------------------------------------|---|--------------------------------------------------------|
|                                                                                         | Percentage of recycled input materials.                                                                                                                     | ↑ |                                                        |
|                                                                                         | Percentage of reclaimed products and their packaging materials for each product category.                                                                   | ↑ |                                                        |
|                                                                                         | Duration of product life.                                                                                                                                   | ↑ |                                                        |
| 2.75. Provide decent work for people, including those with disabilities (Target 8.5)    | Total number of employees with disabilities.                                                                                                                | - |                                                        |
|                                                                                         | Total number and rates of new employee hires.                                                                                                               | ↑ | Hiring new competence.                                 |
|                                                                                         | Employee turnover by age group and gender.                                                                                                                  | ↓ | Turnover.                                              |
|                                                                                         | Benefits and social protection.                                                                                                                             | ↑ | Salary/Benefits.                                       |
|                                                                                         | Total number of employees that were entitled to parental leave, by gender.                                                                                  | - |                                                        |
|                                                                                         | Total number of employees that took parental leave, by gender.                                                                                              | - |                                                        |
|                                                                                         | Return to work and retention rates after parental leave, by gender.                                                                                         | ↑ |                                                        |
|                                                                                         | Training and education.                                                                                                                                     | ↑ | Learning.                                              |
|                                                                                         | Total number of incidents of discrimination and harassment.                                                                                                 | 0 | Work environment. Employees satisfaction.              |
|                                                                                         | Ration of employees with flexible working hours to fixed hours.                                                                                             | ↑ |                                                        |
|                                                                                         |                                                                                                                                                             |   |                                                        |
| 2.76. Provide employment to young people (Target 8.5)                                   | Total number of employees in category under 30 years old.                                                                                                   | ↑ |                                                        |
| 2.77. Minimize forced labor (Target 8.7)                                                | Perception of company's performance on human rights by its employees.                                                                                       | ↑ |                                                        |
|                                                                                         | Percentage of new suppliers that were screened using human rights criteria.                                                                                 | ↑ | Coordination efforts with suppliers.                   |
| 2.78. Minimize child labor (Target 8.7)                                                 | Operations and suppliers identified as having significant risk for incidents of child labor.                                                                | 0 | Coordination efforts with suppliers.                   |
| 2.79. Improve safe and secure working environment (Target 8.8)                          | Incidents related to occupational health and safety.                                                                                                        | 0 | Injuries.                                              |
|                                                                                         | Type of injury and rates of injury, occupational diseases, lost days, and absenteeism, and total number of work-related fatalities, by gender.              | ↓ | Injuries.                                              |
|                                                                                         | Workers with high incidence or high risk of diseases related to their occupation.                                                                           | ↓ |                                                        |
|                                                                                         | Total operations and suppliers in which employee rights to exercise freedom of association or collective bargaining may be violated or at significant risk. | ↓ |                                                        |
|                                                                                         | Total number of incidents of discrimination and harassment.                                                                                                 | 0 | Work environment. Employees satisfaction.              |
|                                                                                         |                                                                                                                                                             |   |                                                        |
| 2.84. Improve infrastructure (Target 9.1)                                               | Infrastructure investments.                                                                                                                                 | ↑ | Total investments.                                     |
|                                                                                         | Products for improved water infrastructure.                                                                                                                 | ↑ | Produced products.                                     |
| 2.85. Increase industry's share of employment and gross domestic product (Target 9.2)   | Total tax payed per year.                                                                                                                                   | ↑ | Revenue.                                               |
|                                                                                         | Total number and rates of new employee hires.                                                                                                               | ↑ | Hiring new competence.                                 |
|                                                                                         | Net employment creation expressed as percentage contribution to employment in a region.                                                                     | ↑ | Hiring new competence.                                 |
| 2.86. Increase the access of small-scale enterprises to financial services (Target 9.3) | Percentage of orders (and invoices) from local SMEs suppliers compared to total orders.                                                                     | ↑ |                                                        |
| 2.87. Upgrade infrastructure and retrofit industries (Target 9.4)                       | Total number of implemented technological upgrading projects.                                                                                               | ↑ | Improvements implemented.                              |
| 2.88. Increase scientific research (Target 9.5)                                         | Time used for R&D activities as a percentage of total worktime.                                                                                             | ↑ | Effective product solution. Time available in R&D dep. |
|                                                                                         | ROI in R&D activities.                                                                                                                                      | ↑ | Return on investments.                                 |
|                                                                                         | Total number of cooperation projects with research institutions.                                                                                            | ↑ |                                                        |
| 2.93. Increase income of the bottom 40% of population (Target 10.1)                     | Minimal wage for workers per year.                                                                                                                          | ↑ | Salary/Benefits.                                       |

|                                                                                                                |                                                                                                                                                                                    |     |                                           |
|----------------------------------------------------------------------------------------------------------------|------------------------------------------------------------------------------------------------------------------------------------------------------------------------------------|-----|-------------------------------------------|
| 2.94. Reduce proportion of people below 50% of median income (Target 10.2)                                     | Minimal wage for workers per year.                                                                                                                                                 | ↑   | Salary/Benefits.                          |
| 2.95. Reduce inequalities and discrimination (Target 10.3)                                                     | Total number of incidents of discrimination and harassment.                                                                                                                        | 0   | Work environment. Employees satisfaction. |
|                                                                                                                | Training and education.                                                                                                                                                            | ↑   | Learning. Competence.                     |
|                                                                                                                | Benefits provided to full-time employees compared to temporary/part-time employees.                                                                                                | ↓   | Salary/Benefits.                          |
| 2.96. Adopt policies to decrease inequality (Target 10.4)                                                      | Total tax paid per year.                                                                                                                                                           | ↑   | Revenue.                                  |
|                                                                                                                | Percentage of employees in the company in each category, gender, age (under 30 years old, 30-50 years old, over 50 years old), minority groups.                                    | -   |                                           |
|                                                                                                                | Average wage for employees within the company in each category, gender, age (under 30 years old, 30-50 years old, over 50 years old), minority groups.                             | -   | Salary/Benefits.                          |
| 2.105. Increase access to safe, adequate and affordable housing (Target 11.1)                                  | Total investments in infrastructure.                                                                                                                                               | ↑   | Total investments.                        |
| 2.106. Increase access to safe, adequate and affordable transport (Target 11.2)                                | Total investments in infrastructure.                                                                                                                                               | ↑   | Total investments.                        |
| 2.111. Reduce number of deaths and affected by disasters (Target 11.5)                                         | Disaster risk management.                                                                                                                                                          | Y/N |                                           |
| 2.120. Reduce the use of natural resources (Target 12.2)                                                       | Total weight/volume of renewable materials used in production per type of material (raw materials, associated process materials, semi-manufacture parts, packaging materials).     | ↑   | Life cycle solutions.                     |
|                                                                                                                | Total weight/volume of non-renewable materials used in production per type of material (raw materials, associated process materials, semi-manufacture parts, packaging materials). | ↓   | Life cycle solutions.                     |
|                                                                                                                | Energy efficiency (consumption per unit produced).                                                                                                                                 | ↑   | Produced products.                        |
|                                                                                                                | Water efficiency (consumption per unit produced).                                                                                                                                  | ↑   | Produced products.                        |
|                                                                                                                | Percentage of reclaimed products and their packaging materials for each product category.                                                                                          | ↑   |                                           |
| 2.122. Reduce releases to air/water/soil of chemicals and all wastes throughout their life cycle (Target 12.4) | Total air emission (GHGs, ODS, NOx, SOx, POP, VOC, HAP, PM) during the LC.                                                                                                         | ↓   | Produced products. Re-work.               |
|                                                                                                                | Total weight of waste by type and disposal method during the LC.                                                                                                                   | ↓   | Life cycle solutions.                     |
|                                                                                                                | Total water discharge by quality and destination during the LC.                                                                                                                    | ↓   | Life cycle solutions.                     |
| 2.123. Reduce waste generation (Target 12.5)                                                                   | Total weight of waste by type and disposal method.                                                                                                                                 | ↓   |                                           |
|                                                                                                                | Percentage of reclaimed products and their packaging materials for each product category.                                                                                          | ↑   |                                           |
| 2.124. Publication of sustainability reports (Target 12.6)                                                     | Comprehensiveness of sustainability report.                                                                                                                                        | ↑   |                                           |
|                                                                                                                | Percentage of operations with implemented social impact assessments.                                                                                                               | ↑   |                                           |
|                                                                                                                | Percentage of operations with implemented environmental impact assessments.                                                                                                        | ↑   |                                           |
| 2.125. Increase the use of sustainable public procurement practices (Target 12.7)                              | Eco-labels/Sustainable certifications for products.                                                                                                                                | ↑   |                                           |
|                                                                                                                | Proportion of suppliers ISO 14001 certified.                                                                                                                                       | ↑   | Coordination efforts with suppliers.      |
|                                                                                                                | Percentage of new suppliers that were screened using labor practices criteria.                                                                                                     | ↑   | Coordination efforts with suppliers.      |
|                                                                                                                | Percentage of new suppliers that were screened using environmental criteria.                                                                                                       | ↑   | Coordination efforts with suppliers.      |
|                                                                                                                | Percentage of new suppliers that were screened using human rights criteria.                                                                                                        | ↑   | Coordination efforts with suppliers.      |
|                                                                                                                | Percentage of new suppliers that were screened using criteria for impacts on society.                                                                                              | ↑   | Coordination efforts with suppliers.      |
| 2.126. Promote education about sustainable development (Target 12.8)                                           | Accessibility of product information to customers.                                                                                                                                 | ↑   | Customer satisfaction.                    |
|                                                                                                                | Educational initiatives on sustainable development for customers and suppliers.                                                                                                    | ↑   | Coordination efforts with suppliers.      |
|                                                                                                                | Total fossil-fuel energy consumption within the company.                                                                                                                           | ↓   |                                           |

|                                                                                                                   |                                                                                                                                                                  |     |                                                                                       |
|-------------------------------------------------------------------------------------------------------------------|------------------------------------------------------------------------------------------------------------------------------------------------------------------|-----|---------------------------------------------------------------------------------------|
| 2.129. Reduce the use of fossil-fuel (Target 12.c)                                                                | Total fossil-fuel energy consumption of suppliers’.                                                                                                              | ↓   |                                                                                       |
|                                                                                                                   | Total fossil-fuel energy consumption of logistics.                                                                                                               | ↓   | Utilization of transport capacity. Extra transport.                                   |
| 2.130. Increase resilience and adaptive capacity to natural disasters (Target 13.1)                               | Risk management related to climate change.                                                                                                                       | Y/N |                                                                                       |
|                                                                                                                   | Environmental protection expenditure.                                                                                                                            | ↑   | Total investments.                                                                    |
| 2.132. Improve education on climate change mitigation/adaptation (Target 13.3)                                    | Training and education in climate change projects for stakeholders.                                                                                              | ↑   |                                                                                       |
| 2.133. Increase number of CC mitigation actions (Target 13.3)                                                     | Total environmental expenditures.                                                                                                                                | ↑   | Total investments.                                                                    |
|                                                                                                                   | Total investment for pollution prevention and control (air, water, and solid waste).                                                                             | ↑   | Total investments.                                                                    |
| 2.135. Reduce marine pollution (Target 14.1)                                                                      | Total water discharge by quality and destination.                                                                                                                | ↓   |                                                                                       |
|                                                                                                                   | Total number and volume of significant spills.                                                                                                                   | ↓   |                                                                                       |
| 2.160. Reduce violence and deaths rates related to violence (Target 16.1)                                         | Registered cases of workplace violence and harassment.                                                                                                           | ↓   | Work environment. Employees satisfaction.                                             |
| 2.161. Reduce abuse, exploitation, trafficking and violence against children (Target 16.2)                        | Operations and suppliers identified as having significant risk for incidents of child labor.                                                                     | 0   | Coordination efforts with suppliers.                                                  |
| 2.162. Promote the rule of law at national and international levels (Target 16.3)                                 | Total monetary value of significant fines for non-compliance with laws and regulations.                                                                          | ↓   | Total cost.                                                                           |
|                                                                                                                   | Total number of non-monetary sanctions for non-compliance with laws and regulations.                                                                             | ↓   |                                                                                       |
| 2.164. Reduce corruption and bribery (Target 16.5)                                                                | Total number and percentage of operations assessed for risks related to corruption and the significant risks identified.                                         | ↓   |                                                                                       |
|                                                                                                                   | Total number and percentage of employees that the company’s anti-corruption policies and procedures have been communicated to, broken down by employee category. | ↑   |                                                                                       |
|                                                                                                                   | Total number of confirmed incidents of corruption.                                                                                                               | ↓   |                                                                                       |
| 2.166. Improve decision-making at all levels (responsive, inclusive, participatory, representative) (Target 16.7) | Stakeholder engagement plans based on stakeholder mapping.                                                                                                       | ↑   |                                                                                       |
|                                                                                                                   | Local community consultation committees and processes that include vulnerable groups.                                                                            | ↑   |                                                                                       |
|                                                                                                                   | Works councils, occupational health and safety committees, and other employee representation bodies to deal with impacts.                                        | ↑   |                                                                                       |
|                                                                                                                   | Percentage of total workforce represented in formal joint management.                                                                                            | ↑   | Employees empowerment.                                                                |
| 2.169. Improve public access to information (Target 16.10)                                                        | Publicly available missions and values statement.                                                                                                                | Y/N |                                                                                       |
|                                                                                                                   | Publicly available strategy and performance results.                                                                                                             | Y/N | Unification of organizational and individual objectives. Structured work environment. |
| 2.170. Protect fundamental freedoms (Target 16.10)                                                                | Total number of substantiated complaints regarding breaches of employees’ and customers’ privacy and losses of data.                                             | ↓   | Customers complaints.                                                                 |
| 2.172. Reduce discrimination and harassment (Target 16.b)                                                         | Total number of incidents of discrimination and harassment.                                                                                                      | 0   | Work environment. Employees satisfaction.                                             |
| 2.188. Improve public, public-private and civil society partnership (Target 17.17)                                | The extent to which the government is present in the shareholding structure.                                                                                     | -   |                                                                                       |
| 2.190. Improve measurement of progress on sustainable development (Target 17.19)                                  | Comprehensiveness of sustainability reports (issues covered).                                                                                                    | ↑   |                                                                                       |

| Sustainability criteria for manufacturing                                                   | Indicators                                                                                                       | Desired direction | Element of organizational model                      |
|---------------------------------------------------------------------------------------------|------------------------------------------------------------------------------------------------------------------|-------------------|------------------------------------------------------|
| 1.1. Reduce cost of product during the whole LC of the product                              | Total product cost.                                                                                              | ↓                 | Total cost.                                          |
| 1.2. Reduce noise from all processes                                                        | Noise level in the factory.                                                                                      | ↓                 |                                                      |
| 1.3. Improve safety of technologies                                                         | Total number of safety incidents.                                                                                | 0                 |                                                      |
| 1.4. Reduce pollution to air during the whole LC of the product                             | Total air emission (GHGs, ODS, NO <sub>x</sub> , SO <sub>x</sub> , POP, VOC, HAP, PM) during material extrusion. | ↓                 |                                                      |
|                                                                                             | Total air emission (GHGs, ODS, NO <sub>x</sub> , SO <sub>x</sub> , POP, VOC, HAP, PM) at the suppliers.          | ↓                 | Actual suppliers quality.                            |
|                                                                                             | Total air emission (GHGs, ODS, NO <sub>x</sub> , SO <sub>x</sub> , POP, VOC, HAP, PM) during the production.     | ↓                 | Produced products. Re-work.                          |
|                                                                                             | Total air emission (GHGs, ODS, NO <sub>x</sub> , SO <sub>x</sub> , POP, VOC, HAP, PM) during the distribution.   | ↓                 | Extra transport. Utilization of transport capacity.  |
|                                                                                             | Total air emission (GHGs, ODS, NO <sub>x</sub> , SO <sub>x</sub> , POP, VOC, HAP, PM) during the use.            | ↓                 |                                                      |
| 1.5. Improve customers satisfaction                                                         | Customer satisfaction.                                                                                           | ↑                 | Customer satisfaction.                               |
| 1.6. Minimize the use of non-renewable natural resources during the whole LC of the product | Ratio of non-renewable natural resources compared to renewable during the production.                            | ↓                 |                                                      |
|                                                                                             | Ratio of non-renewable natural resources compared to renewable during the material extrusion.                    | ↓                 |                                                      |
|                                                                                             | Ratio of non-renewable natural resources compared to renewable during the transportation.                        | ↓                 |                                                      |
|                                                                                             | Ratio of non-renewable natural resources compared to renewable at the suppliers.                                 | ↓                 |                                                      |
| 1.7. Increase value creation for society                                                    | End users' quality of life.                                                                                      | ↑                 |                                                      |
| 1.8. Minimize the use of non-renewable energy during the LC of the product                  | Ratio of non-renewable energy compared to renewable during the production.                                       | ↓                 |                                                      |
|                                                                                             | Ratio of non-renewable energy compared to renewable during the material extrusion.                               | ↓                 |                                                      |
|                                                                                             | Ratio of non-renewable energy compared to renewable during the transportation.                                   | ↓                 |                                                      |
|                                                                                             | Ratio of non-renewable energy compared to renewable at the suppliers.                                            | ↓                 |                                                      |
| 1.9. Minimize the use of land during the product LC                                         | Use of land for extrusion & production.                                                                          | ↓                 |                                                      |
| 1.10. Maximize new opportunities for organization                                           | Number of projects with research institutes.                                                                     | ↑                 |                                                      |
|                                                                                             | Investments in R&D, NOK & % from total investments.                                                              | ↑                 | Total investments. Time used for product innovation. |
| 1.11. Reduce generation of waste during the whole LC of the product                         | Total weight of waste by type and disposal method during the LC.                                                 | ↓                 |                                                      |
|                                                                                             | Total scrap produced.                                                                                            | ↓                 | Products out of specification.                       |
| 1.12. Ensure competitiveness of the product                                                 | Cost of product compared to similar products.                                                                    | ↓                 |                                                      |
|                                                                                             | Quality of product compared to competitors.                                                                      | ↑                 | Product quality.                                     |
| 1.13. Ensure competitiveness of the organization                                            | Organizational income.                                                                                           | ↑                 | Income.                                              |
|                                                                                             | Organizational image.                                                                                            | ↑                 |                                                      |
|                                                                                             | Technological advancement.                                                                                       | ↑                 |                                                      |
| 1.14. Improve employees' rights and development                                             | Employees 'rights to privacy, fair compensation, and freedom from discrimination.                                | ↑                 |                                                      |
|                                                                                             | Employees training and education.                                                                                | ↑                 | Learning.                                            |
|                                                                                             | Number of courses/conferences/workshops attended.                                                                | ↑                 | Learning.                                            |
|                                                                                             | Investment in employee training and education as percentage of net sales.                                        | ↑                 | Total investments. Competence.                       |
| 1.15. Improve operational effectiveness                                                     | Relationship between the planned production cycle to complete a batch and the actual production cycle time.      | ↑                 | Manufacturing schedule adherence.                    |

|                                                                                                                 |                                                                                                                                                              |   |                                                                                                                                                              |
|-----------------------------------------------------------------------------------------------------------------|--------------------------------------------------------------------------------------------------------------------------------------------------------------|---|--------------------------------------------------------------------------------------------------------------------------------------------------------------|
|                                                                                                                 | Total defects (requires rework, repair, reprocessing).                                                                                                       | ↓ | Products out of specification. Rework.                                                                                                                       |
|                                                                                                                 | OEE.                                                                                                                                                         | ↑ | OEE.                                                                                                                                                         |
|                                                                                                                 | Yield loss.                                                                                                                                                  | ↓ | Quality yield.                                                                                                                                               |
| 1.16. Improve operational efficiency                                                                            | Output ratio in time unit (actual versus planned output).                                                                                                    | ↑ | Manufacturing schedule adherence.                                                                                                                            |
|                                                                                                                 | Ratio of the value added production time to total production time.                                                                                           | ↑ |                                                                                                                                                              |
|                                                                                                                 | Changeover time.                                                                                                                                             | ↓ | Changeover time.                                                                                                                                             |
| 1.17. Ensure social equity                                                                                      | Difference between access to benefits among categories of employees.                                                                                         | ↓ | Salary/Benefits.                                                                                                                                             |
| 1.18. Increase functionality of the product                                                                     | Product's functionality perceived by customer.                                                                                                               | ↑ | Satisfy customers' requirements.                                                                                                                             |
|                                                                                                                 |                                                                                                                                                              |   |                                                                                                                                                              |
| 1.19. Protect personal health during the whole LC of the product/service                                        | Health impact of the product in use.                                                                                                                         | ↓ | Product quality.                                                                                                                                             |
|                                                                                                                 | Type of injury and rates of injury, occupational diseases, lost days, and absenteeism, and total number of work-related fatalities, by region and by gender. | ↓ | Injuries. Sick leave.                                                                                                                                        |
|                                                                                                                 | Workers with high incidence or high risk of diseases related to their occupation.                                                                            | ↓ |                                                                                                                                                              |
| 1.20. Increase innovation (through innovative techniques/ methods/ technologies/ practices/ products/ services) | Total number of implemented innovative practices.                                                                                                            | ↑ | Improvements implemented. Improvements in existing products. Time used for product innovation. Improvements in logistics. Organizational focus on innovation |
|                                                                                                                 | Return on implementation of innovative practice.                                                                                                             | ↑ | Return on investments.                                                                                                                                       |
|                                                                                                                 | Proportion of employees by level of education.                                                                                                               | - | Competence.                                                                                                                                                  |
| 1.21. Improve information security and cybersecurity                                                            | Information security incidents.                                                                                                                              | ↓ |                                                                                                                                                              |
| 1.22. Enhance learning of employees                                                                             | Investment in employee training and education as percentage of net sales.                                                                                    | ↑ | Learning.                                                                                                                                                    |
|                                                                                                                 | Number of courses/conferences/workshops attended.                                                                                                            | ↑ | Learning. Competence.                                                                                                                                        |
| 1.23. Improve conditions of work and social protection for employees                                            | Conditions of work evaluated by employees.                                                                                                                   | ↑ | Work environment.                                                                                                                                            |
|                                                                                                                 | Paid days off.                                                                                                                                               | ↑ | Salary/Benefits.                                                                                                                                             |
| 1.24. Increase organizational productivity                                                                      | Ratio of produced to ordered products.                                                                                                                       | ↑ | Backlog orders from customers.                                                                                                                               |
|                                                                                                                 | Ratio of sales per employee.                                                                                                                                 | ↑ | Sales.                                                                                                                                                       |
|                                                                                                                 | Ratio of produced products to labour-hours.                                                                                                                  | ↑ | Produced products.                                                                                                                                           |
| 1.25. Increase organizational profitability                                                                     | Profit.                                                                                                                                                      | ↑ | Revenue.                                                                                                                                                     |
|                                                                                                                 | Manufacturing cost as a percentage of revenue.                                                                                                               | ↓ | Revenue. Production cost.                                                                                                                                    |
|                                                                                                                 | Liquidity.                                                                                                                                                   | ↑ |                                                                                                                                                              |
| 1.26. Improve quality of the product                                                                            | Total number of rejected/returned products by customer.                                                                                                      | ↓ | Customers complaints.                                                                                                                                        |
|                                                                                                                 | Product durability.                                                                                                                                          | ↑ | Product quality.                                                                                                                                             |
| 1.27. Improve quality of the process                                                                            | Yield for process.                                                                                                                                           | ↑ | Quality yield.                                                                                                                                               |
| 1.28. Improve quality of systems                                                                                | Yield for production system.                                                                                                                                 | ↑ |                                                                                                                                                              |
| 1.29. Improve reliability of the product                                                                        | Failure rate of product in use.                                                                                                                              | ↓ | Equipment failure.                                                                                                                                           |
| 1.30. Improve reliability of processes                                                                          | Mean Time Between Failure in a process.                                                                                                                      | ↑ | Equipment failure.                                                                                                                                           |
|                                                                                                                 | Failure Rate of process.                                                                                                                                     | ↓ | Equipment failure.                                                                                                                                           |

|                                                                              |                                                                                                                                                                                               |   |                                                               |
|------------------------------------------------------------------------------|-----------------------------------------------------------------------------------------------------------------------------------------------------------------------------------------------|---|---------------------------------------------------------------|
|                                                                              | Ratio of corrective maintenance time in relation to the total maintenance (planned and corrective).                                                                                           | ↓ | Reactive maintenance. Preventive maintenance.                 |
| 1.31. Improve reliability of technologies                                    | Mean Time Between Failure for equipment.                                                                                                                                                      | ↑ | Equipment failure.                                            |
|                                                                              | Failure Rate of equipment.                                                                                                                                                                    | ↓ | Equipment failure.                                            |
| 1.32. Improve reliability of systems                                         | Mean Time Between Failure for production system.                                                                                                                                              | ↑ | Equipment failure.                                            |
|                                                                              | Failure Rate of production system.                                                                                                                                                            | ↓ | Equipment failure.                                            |
|                                                                              | Number of emergency events or unplanned shutdowns                                                                                                                                             | ↓ | Unplanned stops.                                              |
| 1.33. Improve safety of the product                                          | Total number of incidents of non-compliance with regulations and voluntary codes concerning the health and safety impacts of products.                                                        | ↓ |                                                               |
| 1.34. Improve safety of processes                                            | Hours of safety training per employee.                                                                                                                                                        | ↑ |                                                               |
|                                                                              | Safety incidents for process.                                                                                                                                                                 | 0 |                                                               |
| 1.35. Ensure fairness on employee wages and benefits                         | Minimal wage for workers per year.                                                                                                                                                            | ↑ | Salary/Benefits.                                              |
|                                                                              | Ratio of local minimum wage to the company's entry level wage by gender.                                                                                                                      | ↑ | Salary/Benefits.                                              |
| 1.36. Reduce employee turnover                                               | Employees turnover per year.                                                                                                                                                                  | ↓ | Turnover.                                                     |
| 1.37. Protect biodiversity                                                   | Investments in biodiversity.                                                                                                                                                                  | ↑ | Total investments.                                            |
| 1.38. No bribery and corruption                                              | Total number and percentage of employees that the company's anti-corruption policies and procedures have been communicated to, broken down by employee category.                              | ↑ |                                                               |
|                                                                              | Total number of confirmed incidents of corruption.                                                                                                                                            | ↓ |                                                               |
| 1.39. Improve professional knowledge and competence of employees             | Percentage of employees who agree that their knowledge and competence has been increased.                                                                                                     | ↑ | Competence.                                                   |
| 1.40. Improve safety of systems                                              | Safety incidents in production systems.                                                                                                                                                       | 0 |                                                               |
| 1.41. Ensure compatible salary                                               | Rate of salary compared to average in industry.                                                                                                                                               | ↑ | Salary/Benefits.                                              |
| 1.42. Reduce pollution to soil during the whole LC of the product            | Pollution to soil in production.                                                                                                                                                              | ↓ | Re-work.                                                      |
|                                                                              | Pollution to soil in suppliers' production.                                                                                                                                                   | ↓ | Actual suppliers quality.                                     |
|                                                                              | Pollution to soil during transportation.                                                                                                                                                      | ↓ | Extra transport. Utilization of transport capacity.           |
|                                                                              | Pollution to soil during the use.                                                                                                                                                             | ↓ | Product quality.                                              |
| 1.43. Improve employees satisfaction                                         | Percentage of employees satisfied with their work.                                                                                                                                            | ↑ | Employees satisfaction.                                       |
|                                                                              | Percentage of employees feel motivated at work.                                                                                                                                               | ↑ | Motivation.                                                   |
|                                                                              | Total grievances registered and resolved.                                                                                                                                                     | ↓ | Work environment.                                             |
| 1.44. Minimize the use of toxic materials during the whole LC of the product | Toxic materials in production.                                                                                                                                                                | ↓ |                                                               |
|                                                                              | Toxic materials in product.                                                                                                                                                                   | ↓ | Product quality. Complaints to regulations.                   |
| 1.45. Increase employee involvement and empowerment                          | Percentage of employees who agree that company involve and encourage employees.                                                                                                               | ↑ | Employees engagement. Employees empowerment.                  |
|                                                                              | Percentage of employees that are shareholders in the company.                                                                                                                                 | ↑ |                                                               |
|                                                                              | Number of suggested improvements by employee.                                                                                                                                                 | ↑ | Employees engagement. Interest in organizational development. |
| 1.46. Provide democratic processes and accountable governance structures     | Percentage of total employees covered by collective bargaining agreements.                                                                                                                    | ↑ |                                                               |
|                                                                              | Composition of the governance body and its committees by: executive or non-executive, gender, competences relating to economic, environmental and social impacts, stakeholder representation. | - |                                                               |
|                                                                              | Company's openness to stakeholder review and participation in decision-making process.                                                                                                        | ↑ |                                                               |

|                                                                       |                                                                                                                                                              |   |                                             |
|-----------------------------------------------------------------------|--------------------------------------------------------------------------------------------------------------------------------------------------------------|---|---------------------------------------------|
| 1.47. Minimize the use of water during the whole LC of the product    | Total water withdrawal in production.                                                                                                                        | ↓ |                                             |
|                                                                       | Total water withdrawal by suppliers.                                                                                                                         | ↓ |                                             |
|                                                                       | Total water withdrawal in use.                                                                                                                               | ↓ |                                             |
| 1.48. Increasing the wealth of the society                            | Total number and rates of new employee hires.                                                                                                                | ↑ | Hiring new competence.                      |
|                                                                       | Societal investment.                                                                                                                                         | ↑ | Total investment.                           |
| 1.49. Improve the quality of life (employees, customers, and society) | Quality of life evaluated by employees.                                                                                                                      | ↑ |                                             |
| 1.50. Decrease in the frequency of environmental accidents            | Environmental accidents in production.                                                                                                                       | 0 |                                             |
| 1.51. Provide equitable opportunities for all employees               | Percentage of employees feeling equitable opportunities for development.                                                                                     | ↑ |                                             |
| 1.52. Ensure organizational survival                                  | Market share.                                                                                                                                                | ↑ |                                             |
|                                                                       | Organizational income.                                                                                                                                       | ↑ | Income.                                     |
|                                                                       | Return on average capital employed (ROACE).                                                                                                                  | ↑ |                                             |
| 1.53. Encourage workplace diversity                                   | Percentage of employees within the company in each category, gender, age (under 30 years old, 30-50 years old, over 50 years old), minority groups.          | - |                                             |
| 1.54. Ensure acceptable working hours                                 | Hours of overwork per employee.                                                                                                                              | ↓ | Excessive work overload per employee.       |
|                                                                       | Percentage of working hours outside of normal working hours.                                                                                                 | ↓ |                                             |
| 1.55. Improve company reputation                                      | Reputation of the company.                                                                                                                                   | ↑ |                                             |
|                                                                       | Number of complaints received from the community.                                                                                                            | ↓ |                                             |
|                                                                       | Total number of sanctions for noncompliance with laws and regulations.                                                                                       | ↓ |                                             |
| 1.56. Maximize effectiveness of product over the whole LC             | Duration of product life.                                                                                                                                    | ↑ | Product quality.                            |
| 1.57. Reduce pollution to water during the whole LC of the product    | Quality of discharged water from production.                                                                                                                 | ↑ |                                             |
|                                                                       | Quality of discharged water at suppliers' sites.                                                                                                             | ↑ |                                             |
|                                                                       | Total amount of pollutants to water during transportation.                                                                                                   | ↓ |                                             |
|                                                                       | Total amount of pollutants to water during the use.                                                                                                          | ↓ |                                             |
| 1.58. Ensure conformance to laws and regulations                      | Cases of law and regulations violation.                                                                                                                      | ↓ |                                             |
| 1.59. Ensure fair competition                                         | Total number of legal actions for anti-competitive behavior, anti-trust, and monopoly practices.                                                             | ↓ |                                             |
| 1.60. Increase productivity of employees                              | Percentage of employees agreed that their productivity has increased.                                                                                        | ↑ | Perf_Productivity.                          |
|                                                                       | Ratio of monthly product value shipped to monthly labor expenditures.                                                                                        | ↑ | Cost of labour. Customers' incoming orders. |
| 1.61. Improve occupational health and safety                          | Type of injury and rates of injury, occupational diseases, lost days, and absenteeism, and total number of work-related fatalities, by region and by gender. | ↓ | Sick leave.                                 |
| 1.62. Ensure freedom of association and collective bargaining         | Percentage of employees feeling the freedom of associations.                                                                                                 | ↑ |                                             |
|                                                                       | Number of employees in associations.                                                                                                                         | ↑ |                                             |
|                                                                       | Total operations and suppliers in which employee rights to exercise freedom of association or collective bargaining may be violated or at significant risk.  | ↓ |                                             |
| 1.63. Reduce discrimination                                           | Total number of incidents of discrimination and harassment.                                                                                                  | 0 | Work environment. Employees satisfaction.   |

|                                                   |                                                                                                                                              |   |                                                                |
|---------------------------------------------------|----------------------------------------------------------------------------------------------------------------------------------------------|---|----------------------------------------------------------------|
| 1.64. Improve restoration of natural habitats     | Investments in restoration of natural habitats.                                                                                              | ↑ | Total investments.                                             |
| 1.65. Increase employment creation                | Net employment creation expressed as percentage contribution to employment in a region.                                                      | ↑ |                                                                |
|                                                   | Total number and rates of new employee hires.                                                                                                | ↑ | Hiring new competence.                                         |
|                                                   | Proportion of orders (in NOK) from local suppliers.                                                                                          | ↑ |                                                                |
| 1.66. Improve well-being of local communities     | Investments into community projects (e.g., schools, hospitals, infrastructure) as percentage of revenues.                                    | ↑ | Total investments.                                             |
|                                                   | Local community development programs based on local communities' needs.                                                                      | ↑ | Total investments.                                             |
|                                                   | Proportion of employees hired from the local community.                                                                                      | ↑ |                                                                |
|                                                   | Proportion of orders (in NOK) from local suppliers.                                                                                          | ↑ |                                                                |
| 1.67. Ensure human rights for employees           | Cases of violation of human rights.                                                                                                          | 0 | Employees satisfaction.                                        |
|                                                   | Perception of company's performance on human rights by its employees.                                                                        | ↑ | Employees satisfaction.                                        |
| 1.68. Improve work-life balance for employees     | Total hours of overwork.                                                                                                                     | ↓ | Excessive work overload per employee.                          |
| 1.69. Respect indigenous rights                   | Total number of incidents of violations involving rights of indigenous peoples.                                                              | 0 |                                                                |
| 1.70. Responsible political involvement           | Participation in public policy development.                                                                                                  | ↑ |                                                                |
| 1.71. Increase social investment                  | Total social investment.                                                                                                                     | ↑ | Total investments.                                             |
| 1.72. Increase supplier support and collaboration | Improvements projects for suppliers.                                                                                                         | ↑ | Coordination efforts with suppliers. Actual suppliers quality. |
|                                                   | Suppliers owned or staffed by members of vulnerable, marginalized or underrepresented social groups.                                         | ↑ |                                                                |
| 1.73. Ensure customers' rights                    | Total number of substantiated complaints regarding breaches of customer privacy and losses of customer data                                  | ↓ | Customers complaints.                                          |
| 1.74. Increase stakeholder engagement             | Percentage of stakeholders agreed that they are engaged in decision-making.                                                                  | ↑ |                                                                |
|                                                   | Policy and procedures involving consultation and negotiation with employees over changes in the company (e.g., restructuring, redundancies). | ↑ | Employees empowerment.                                         |
|                                                   | Summary of the policy on stakeholder involvement.                                                                                            | - |                                                                |
| 1.75. Threat suppliers fairly                     | Ratio of supplier price to market price.                                                                                                     | ↑ | Price of raw materials.                                        |
